# Supplementary material for: Circadian Profiling of the Arabidopsis Proteome Using 2D-DIGE
Source: Front Plant Sci. 2016 Jul 12;7:1007. doi: 10.3389/fpls.2016.01007 (PMC4940426; doi:10.3389/fpls.2016.01007)
Supplement: Supplementary file 7 [file Table7.XLSX]

## Sheet: Sheet1
Identity of each spot in which a given protein was identified for the phenol extraction (red font) and Rubisco depletion (black font) methods
Experiment name	Biological sample category	Biological sample name	MS/MS sample name	Protein name	Protein accession numbers	Database sources	Protein molecular weight (Da)	Protein identification probability	Number of unique peptides	Number of unique spectra	Number of total spectra	Percentage of total spectra	Percentage sequence coverage
201210Orbi_Dave_Gelsample (1)	Uncategorized Sample	BioSample 1	P47 (F020928)	| Symbols: | Lactate/malate dehydrogenase family protein | chr1:1189418-1191267 REVERSE LENGTH=332	AT1G04410.1	TAIR10_pep_20101214_contaminants.fasta	35570.9	1	4	4	2	0.0013	0.0724
201210Orbi_Dave_Gelsample (1)	Uncategorized Sample	BioSample 1	P49 (F020930)	| Symbols: | Lactate/malate dehydrogenase family protein | chr1:1189418-1191267 REVERSE LENGTH=332	AT1G04410.1	TAIR10_pep_20101214_contaminants.fasta	35570.9	1	6	6	5	0.0036	0.0701
201210Orbi_Dave_Gelsample (1)	Uncategorized Sample	BioSample 1	P59 (F020940)	| Symbols: | Lactate/malate dehydrogenase family protein | chr1:1189418-1191267 REVERSE LENGTH=332	AT1G04410.1	TAIR10_pep_20101214_contaminants.fasta	35570.9	1	3	3	10	0.0078	0.172
201211Orbi_Dave_Gelsample2	Uncategorized Sample	BioSample 1	S13 (F020989)	| Symbols: | Lactate/malate dehydrogenase family protein | chr1:1189418-1191267 REVERSE LENGTH=332	AT1G04410.1	TAIR10_pep_20101214_contaminants.fasta	35570.9	1	16	18	34	0.0178	0.502
201211Orbi_Dave_Gelsample2	Uncategorized Sample	BioSample 1	S17 (F020993)	| Symbols: | Lactate/malate dehydrogenase family protein | chr1:1189418-1191267 REVERSE LENGTH=332	AT1G04410.1	TAIR10_pep_20101214_contaminants.fasta	35570.9	0.999	2	2	46	0.026	0.457
201210Orbi_Dave_Gelsample (1)	Uncategorized Sample	BioSample 1	P38 (F020919)	| Symbols: | NAD(P)-linked oxidoreductase superfamily protein | chr1:1191634-1193699 FORWARD LENGTH=412	AT1G04420.1	TAIR10_pep_20101214_contaminants.fasta	46428.2	1	11	15	18	0.0125	0.347
201210Orbi_Dave_Gelsample (1)	Uncategorized Sample	BioSample 1	P40 (F020921)	| Symbols: | NAD(P)-linked oxidoreductase superfamily protein | chr1:1191634-1193699 FORWARD LENGTH=412	AT1G04420.1	TAIR10_pep_20101214_contaminants.fasta	46428.2	1	7	7	12	0.0067	0.24
201211Orbi_Dave_Gelsample2	Uncategorized Sample	BioSample 1	S55 (F021052)	| Symbols: | NAD(P)-linked oxidoreductase superfamily protein | chr1:1191634-1193699 FORWARD LENGTH=412	AT1G04420.1	TAIR10_pep_20101214_contaminants.fasta	46428.2	1	10	10	7	0.00475	0.183
201210Orbi_Dave_Gelsample (1)	Uncategorized Sample	BioSample 1	P14 (F020965)	| Symbols: URH2 | uridine-ribohydrolase 2 | chr1:1679286-1681527 FORWARD LENGTH=322	AT1G05620.1,AT1G05620.2	TAIR10_pep_20101214_contaminants.fasta	34668.8	0.998	2	2	2	0.0028	0.0683
201211Orbi_Dave_Gelsample2	Uncategorized Sample	BioSample 1	S18 (F020994)	| Symbols: URH2 | uridine-ribohydrolase 2 | chr1:1679286-1681527 FORWARD LENGTH=322	AT1G05620.1,AT1G05620.2	TAIR10_pep_20101214_contaminants.fasta	34668.8	1	2	2	2	0.00187	0.0683
201211Orbi_Dave_Gelsample2	Uncategorized Sample	BioSample 1	S58 (F021055)	| Symbols: URH2 | uridine-ribohydrolase 2 | chr1:1679286-1681527 FORWARD LENGTH=322	AT1G05620.1,AT1G05620.2	TAIR10_pep_20101214_contaminants.fasta	34668.8	1	6	6	13	0.0104	0.18
201210Orbi_Dave_Gelsample (1)	Uncategorized Sample	BioSample 1	P38 (F020919)	| Symbols: | UDP-Glycosyltransferase superfamily protein | chr1:1820495-1821802 REVERSE LENGTH=435	AT1G06000.1	TAIR10_pep_20101214_contaminants.fasta	48122.9	1	8	10	18	0.0125	0.214
201210Orbi_Dave_Gelsample (1)	Uncategorized Sample	BioSample 1	P40 (F020921)	| Symbols: | UDP-Glycosyltransferase superfamily protein | chr1:1820495-1821802 REVERSE LENGTH=435	AT1G06000.1	TAIR10_pep_20101214_contaminants.fasta	48122.9	1	7	9	17	0.0095	0.2
201211Orbi_Dave_Gelsample2	Uncategorized Sample	BioSample 1	S55 (F021052)	| Symbols: | UDP-Glycosyltransferase superfamily protein | chr1:1820495-1821802 REVERSE LENGTH=435	AT1G06000.1	TAIR10_pep_20101214_contaminants.fasta	48122.9	1	3	3	4	0.00269	0.0851
201210Orbi_Dave_Gelsample (1)	Uncategorized Sample	BioSample 1	P46 (F020927)	| Symbols: | Tropomyosin-related | chr1:2001625-2002596 FORWARD LENGTH=323	AT1G06530.1	TAIR10_pep_20101214_contaminants.fasta	36119.6	1	9	10	15	0.0106	0.3
201211Orbi_Dave_Gelsample2	Uncategorized Sample	BioSample 1	S12 (F020988)	| Symbols: | Tropomyosin-related | chr1:2001625-2002596 FORWARD LENGTH=323	AT1G06530.1	TAIR10_pep_20101214_contaminants.fasta	36119.6	1	17	18	33	0.0229	0.421
201211Orbi_Dave_Gelsample2	Uncategorized Sample	BioSample 1	S56 (F021053)	| Symbols: | Tropomyosin-related | chr1:2001625-2002596 FORWARD LENGTH=323	AT1G06530.1	TAIR10_pep_20101214_contaminants.fasta	36119.6	1	3	3	3	0.00251	0.0991
201210Orbi_Dave_Gelsample (1)	Uncategorized Sample	BioSample 1	P10 (F020875)	| Symbols: PSBP-1, OEE2, PSII-P, OE23 | photosystem II subunit P-1 | chr1:2047940-2049186 FORWARD LENGTH=263	AT1G06680.1,AT1G06680.2	TAIR10_pep_20101214_contaminants.fasta	28095.4	1	5	6	10	0.0061	0.221
201210Orbi_Dave_Gelsample (1)	Uncategorized Sample	BioSample 1	P15 (F020879)	| Symbols: PSBP-1, OEE2, PSII-P, OE23 | photosystem II subunit P-1 | chr1:2047940-2049186 FORWARD LENGTH=263	AT1G06680.1,AT1G06680.2	TAIR10_pep_20101214_contaminants.fasta	28095.4	1	3	3	3	0.0022	0.167
201210Orbi_Dave_Gelsample (1)	Uncategorized Sample	BioSample 1	P16 (F020880)	| Symbols: PSBP-1, OEE2, PSII-P, OE23 | photosystem II subunit P-1 | chr1:2047940-2049186 FORWARD LENGTH=263	AT1G06680.1,AT1G06680.2	TAIR10_pep_20101214_contaminants.fasta	28095.4	1	8	12	63	0.0599	0.38
201210Orbi_Dave_Gelsample (1)	Uncategorized Sample	BioSample 1	P22 (F020887)	| Symbols: PSBP-1, OEE2, PSII-P, OE23 | photosystem II subunit P-1 | chr1:2047940-2049186 FORWARD LENGTH=263	AT1G06680.1,AT1G06680.2	TAIR10_pep_20101214_contaminants.fasta	28095.4	1	10	14	62	0.0549	0.422
201211Orbi_Dave_Gelsample2	Uncategorized Sample	BioSample 1	S27 (F021003)	| Symbols: PSBP-1, OEE2, PSII-P, OE23 | photosystem II subunit P-1 | chr1:2047940-2049186 FORWARD LENGTH=263	AT1G06680.1,AT1G06680.2	TAIR10_pep_20101214_contaminants.fasta	28095.4	1	3	3	7	0.00557	0.183
201210Orbi_Dave_Gelsample (1)	Uncategorized Sample	BioSample 1	P54 (F020935)	| Symbols: APX1, MEE6, CS1, ATAPX1, ATAPX01 | ascorbate peroxidase 1 | chr1:2438005-2439435 FORWARD LENGTH=250	AT1G07890.1,AT1G07890.2,AT1G07890.3,AT1G07890.4,AT1G07890.5,AT1G07890.6,AT1G07890.7,AT1G07890.8	TAIR10_pep_20101214_contaminants.fasta	27562	0.998	2	2	2	0.0016	0.128
201210Orbi_Dave_Gelsample (1)	Uncategorized Sample	BioSample 1	P59 (F020940)	| Symbols: APX1, MEE6, CS1, ATAPX1, ATAPX01 | ascorbate peroxidase 1 | chr1:2438005-2439435 FORWARD LENGTH=250	AT1G07890.1,AT1G07890.2,AT1G07890.3,AT1G07890.4,AT1G07890.5,AT1G07890.6,AT1G07890.7,AT1G07890.8	TAIR10_pep_20101214_contaminants.fasta	27562	1	6	8	12	0.0107	0.372
201211Orbi_Dave_Gelsample2	Uncategorized Sample	BioSample 1	S27 (F021003)	| Symbols: APX1, MEE6, CS1, ATAPX1, ATAPX01 | ascorbate peroxidase 1 | chr1:2438005-2439435 FORWARD LENGTH=250	AT1G07890.1,AT1G07890.2,AT1G07890.3,AT1G07890.4,AT1G07890.5,AT1G07890.6,AT1G07890.7,AT1G07890.8	TAIR10_pep_20101214_contaminants.fasta	27562	0.999	2	2	17	0.0149	0.31
201210Orbi_Dave_Gelsample (1)	Uncategorized Sample	BioSample 1	P61 (F020942)	| Symbols: | lactoylglutathione lyase family protein / glyoxalase I family protein | chr1:2535702-2537630 FORWARD LENGTH=185	AT1G08110.1,AT1G08110.2,AT1G08110.3,AT1G08110.4	TAIR10_pep_20101214_contaminants.fasta	20849.1	1	13	17	48	0.0453	0.676
201211Orbi_Dave_Gelsample2	Uncategorized Sample	BioSample 1	S29 (F021005)	| Symbols: | lactoylglutathione lyase family protein / glyoxalase I family protein | chr1:2535702-2537630 FORWARD LENGTH=185	AT1G08110.1,AT1G08110.2,AT1G08110.3,AT1G08110.4	TAIR10_pep_20101214_contaminants.fasta	20849.1	0.999	2	2	4	0.00376	0.0973
201210Orbi_Dave_Gelsample (1)	Uncategorized Sample	BioSample 1	P41 (F020922)	| Symbols: NPQ1, AVDE1 | non-photochemical quenching 1 | chr1:2707462-2709387 FORWARD LENGTH=462	AT1G08550.1,AT1G08550.2	TAIR10_pep_20101214_contaminants.fasta	52018.4	1	6	6	8	0.0057	0.212
201210Orbi_Dave_Gelsample (1)	Uncategorized Sample	BioSample 1	P46 (F020927)	| Symbols: NPQ1, AVDE1 | non-photochemical quenching 1 | chr1:2707462-2709387 FORWARD LENGTH=462	AT1G08550.1,AT1G08550.2	TAIR10_pep_20101214_contaminants.fasta	52018.4	1	3	3	5	0.0035	0.0801
201211Orbi_Dave_Gelsample2	Uncategorized Sample	BioSample 1	S18 (F020994)	| Symbols: NPQ1, AVDE1 | non-photochemical quenching 1 | chr1:2707462-2709387 FORWARD LENGTH=462	AT1G08550.1,AT1G08550.2	TAIR10_pep_20101214_contaminants.fasta	52018.4	0.999	2	2	3	0.00281	0.0498
201210Orbi_Dave_Gelsample (1)	Uncategorized Sample	BioSample 1	P38 (F020919)	| Symbols: ATAMI1, AMI1, ATTOC64-I, TOC64-I | amidase 1 | chr1:2884455-2886430 FORWARD LENGTH=425	AT1G08980.1	TAIR10_pep_20101214_contaminants.fasta	45056.6	1	14	21	36	0.0249	0.522
201210Orbi_Dave_Gelsample (1)	Uncategorized Sample	BioSample 1	P40 (F020921)	| Symbols: ATAMI1, AMI1, ATTOC64-I, TOC64-I | amidase 1 | chr1:2884455-2886430 FORWARD LENGTH=425	AT1G08980.1	TAIR10_pep_20101214_contaminants.fasta	45056.6	1	8	12	20	0.0111	0.289
201211Orbi_Dave_Gelsample2	Uncategorized Sample	BioSample 1	S55 (F021052)	| Symbols: ATAMI1, AMI1, ATTOC64-I, TOC64-I | amidase 1 | chr1:2884455-2886430 FORWARD LENGTH=425	AT1G08980.1	TAIR10_pep_20101214_contaminants.fasta	45056.6	1	6	6	11	0.0074	0.233
201210Orbi_Dave_Gelsample (1)	Uncategorized Sample	BioSample 1	P46 (F020927)	| Symbols: CRB, CSP41B, HIP1.3 | chloroplast RNA binding | chr1:3015473-3018035 FORWARD LENGTH=378	AT1G09340.1	TAIR10_pep_20101214_contaminants.fasta	42621.4	1	2	2	2	0.0014	0.0741
201211Orbi_Dave_Gelsample2	Uncategorized Sample	BioSample 1	S10 (F020986)	| Symbols: CRB, CSP41B, HIP1.3 | chloroplast RNA binding | chr1:3015473-3018035 FORWARD LENGTH=378	AT1G09340.1	TAIR10_pep_20101214_contaminants.fasta	42621.4	1	3	3	5	0.00379	0.114
201210Orbi_Dave_Gelsample (1)	Uncategorized Sample	BioSample 1	P48 (F020929)	| Symbols: | NAD(P)-binding Rossmann-fold superfamily protein | chr1:3066811-3068484 FORWARD LENGTH=325	AT1G09500.1	TAIR10_pep_20101214_contaminants.fasta	35773.8	1	17	21	23	0.016	0.473
201211Orbi_Dave_Gelsample2	Uncategorized Sample	BioSample 1	S14 (F020990)	| Symbols: | NAD(P)-binding Rossmann-fold superfamily protein | chr1:3066811-3068484 FORWARD LENGTH=325	AT1G09500.1	TAIR10_pep_20101214_contaminants.fasta	35773.8	1	5	5	4	0.00301	0.102
201210Orbi_Dave_Gelsample (1)	Uncategorized Sample	BioSample 1	P51 (F020932)	| Symbols: ATGLX1, GLX1 | glyoxalase I homolog | chr1:3996045-3997518 FORWARD LENGTH=283	AT1G11840.1,AT1G11840.2,AT1G11840.3,AT1G11840.4,AT1G11840.6	TAIR10_pep_20101214_contaminants.fasta	31929.4	1	2	2	3	0.0023	0.163
201211Orbi_Dave_Gelsample2	Uncategorized Sample	BioSample 1	S22 (F020998)	| Symbols: ATGLX1, GLX1 | glyoxalase I homolog | chr1:3996045-3997518 FORWARD LENGTH=283	AT1G11840.1,AT1G11840.2,AT1G11840.3,AT1G11840.4,AT1G11840.6	TAIR10_pep_20101214_contaminants.fasta	31929.4	1	9	12	23	0.0178	0.371
201211Orbi_Dave_Gelsample2	Uncategorized Sample	BioSample 1	S23 (F020999)	| Symbols: ATGLX1, GLX1 | glyoxalase I homolog | chr1:3996045-3997518 FORWARD LENGTH=283	AT1G11840.1,AT1G11840.2,AT1G11840.3,AT1G11840.4,AT1G11840.6	TAIR10_pep_20101214_contaminants.fasta	31929.4	1	3	3	4	0.00299	0.127
201211Orbi_Dave_Gelsample2	Uncategorized Sample	BioSample 1	S25 (F021001)	| Symbols: ATGLX1, GLX1 | glyoxalase I homolog | chr1:3996045-3997518 FORWARD LENGTH=283	AT1G11840.1,AT1G11840.2,AT1G11840.3,AT1G11840.4,AT1G11840.6	TAIR10_pep_20101214_contaminants.fasta	31929.4	1	19	26	67	0.0443	0.534
201210Orbi_Dave_Gelsample (1)	Uncategorized Sample	BioSample 1	P11 (F020876)	| Symbols: APA1, ATAPA1 | aspartic proteinase A1 | chr1:4017119-4019874 REVERSE LENGTH=506	AT1G11910.1	TAIR10_pep_20101214_contaminants.fasta	54613.7	1	10	11	14	0.0089	0.32
201210Orbi_Dave_Gelsample (1)	Uncategorized Sample	BioSample 1	P51 (F020932)	| Symbols: APA1, ATAPA1 | aspartic proteinase A1 | chr1:4017119-4019874 REVERSE LENGTH=506	AT1G11910.1	TAIR10_pep_20101214_contaminants.fasta	54613.7	1	7	7	8	0.0062	0.196
201211Orbi_Dave_Gelsample2	Uncategorized Sample	BioSample 1	S58 (F021055)	| Symbols: APA1, ATAPA1 | aspartic proteinase A1 | chr1:4017119-4019874 REVERSE LENGTH=506	AT1G11910.1	TAIR10_pep_20101214_contaminants.fasta	54613.7	1	2	2	3	0.00239	0.0395
201210Orbi_Dave_Gelsample (1)	Uncategorized Sample	BioSample 1	P31 (F020913)	| Symbols: ATBETAFRUCT4, VAC-INV | Glycosyl hydrolases family 32 protein | chr1:4153699-4157457 FORWARD LENGTH=664	AT1G12240.1	TAIR10_pep_20101214_contaminants.fasta	73845.3	0.998	2	2	3	0.002	0.0437
201211Orbi_Dave_Gelsample2	Uncategorized Sample	BioSample 1	S26 (F021002)	| Symbols: ATBETAFRUCT4, VAC-INV | Glycosyl hydrolases family 32 protein | chr1:4153699-4157457 FORWARD LENGTH=664	AT1G12240.1	TAIR10_pep_20101214_contaminants.fasta	73845.3	1	4	4	6	0.00526	0.0843
201211Orbi_Dave_Gelsample2	Uncategorized Sample	BioSample 1	S28 (F021004)	| Symbols: PBE1 | 20S proteasome beta subunit E1 | chr1:4452641-4454663 FORWARD LENGTH=274	AT1G13060.1	TAIR10_pep_20101214_contaminants.fasta	29668.4	1	5	5	12	0.00903	0.23
201210Orbi_Dave_Gelsample (1)	Uncategorized Sample	BioSample 1	P60 (F020941)	| Symbols: PBE1 | 20S proteasome beta subunit E1 | chr1:4452641-4454663 FORWARD LENGTH=274	AT1G13060.1,AT1G13060.2	TAIR10_pep_20101214_contaminants.fasta	29668.4	1	3	3	3	0.0022	0.153
201211Orbi_Dave_Gelsample2	Uncategorized Sample	BioSample 1	S29 (F021005)	| Symbols: SAC52, RPL10, RPL10A | Ribosomal protein L16p/L10e family protein | chr1:4888270-4889408 FORWARD LENGTH=220	AT1G14320.1	TAIR10_pep_20101214_contaminants.fasta	24917.5	1	4	4	7	0.00659	0.164
201210Orbi_Dave_Gelsample (1)	Uncategorized Sample	BioSample 1	P16 (F020880)	| Symbols: SAC52, RPL10, RPL10A | Ribosomal protein L16p/L10e family protein | chr1:4888270-4889408 FORWARD LENGTH=220	AT1G14320.1,AT1G26910.1,AT1G66580.1	TAIR10_pep_20101214_contaminants.fasta	24909.5	1	2	2	3	0.0029	0.104
201210Orbi_Dave_Gelsample (1)	Uncategorized Sample	BioSample 1	P15 (F020879)	| Symbols: LHCB6, CP24 | light harvesting complex photosystem II subunit 6 | chr1:5446685-5447676 REVERSE LENGTH=258	AT1G15820.1	TAIR10_pep_20101214_contaminants.fasta	27523.5	1	4	6	9	0.0066	0.19
201210Orbi_Dave_Gelsample (1)	Uncategorized Sample	BioSample 1	P16 (F020880)	| Symbols: LHCB6, CP24 | light harvesting complex photosystem II subunit 6 | chr1:5446685-5447676 REVERSE LENGTH=258	AT1G15820.1	TAIR10_pep_20101214_contaminants.fasta	27523.5	0.998	2	2	3	0.0029	0.109
201210Orbi_Dave_Gelsample (1)	Uncategorized Sample	BioSample 1	P31 (F020913)	| Symbols: LHCB6, CP24 | light harvesting complex photosystem II subunit 6 | chr1:5446685-5447676 REVERSE LENGTH=258	AT1G15820.1	TAIR10_pep_20101214_contaminants.fasta	27523.5	1	3	4	7	0.0048	0.159
201210Orbi_Dave_Gelsample (1)	Uncategorized Sample	BioSample 1	P51 (F020932)	| Symbols: LHCB6, CP24 | light harvesting complex photosystem II subunit 6 | chr1:5446685-5447676 REVERSE LENGTH=258	AT1G15820.1	TAIR10_pep_20101214_contaminants.fasta	27523.5	0.998	2	2	3	0.0023	0.101
201210Orbi_Dave_Gelsample (1)	Uncategorized Sample	BioSample 1	P61 (F020942)	| Symbols: LHCB6, CP24 | light harvesting complex photosystem II subunit 6 | chr1:5446685-5447676 REVERSE LENGTH=258	AT1G15820.1	TAIR10_pep_20101214_contaminants.fasta	27523.5	1	2	2	3	0.0028	0.109
201211Orbi_Dave_Gelsample2	Uncategorized Sample	BioSample 1	S18 (F020994)	| Symbols: LHCB6, CP24 | light harvesting complex photosystem II subunit 6 | chr1:5446685-5447676 REVERSE LENGTH=258	AT1G15820.1	TAIR10_pep_20101214_contaminants.fasta	27523.5	1	6	7	9	0.00843	0.209
201211Orbi_Dave_Gelsample2	Uncategorized Sample	BioSample 1	S22 (F020998)	| Symbols: LHCB6, CP24 | light harvesting complex photosystem II subunit 6 | chr1:5446685-5447676 REVERSE LENGTH=258	AT1G15820.1	TAIR10_pep_20101214_contaminants.fasta	27523.5	1	5	5	8	0.00619	0.19
201210Orbi_Dave_Gelsample (1)	Uncategorized Sample	BioSample 1	P49 (F020930)	| Symbols: ATKDSA2, ATKSDA | Aldolase superfamily protein | chr1:5588123-5590469 REVERSE LENGTH=291	AT1G16340.1,AT1G16340.2,AT1G16340.3	TAIR10_pep_20101214_contaminants.fasta	31676.1	1	11	13	21	0.0126	0.54
201211Orbi_Dave_Gelsample2	Uncategorized Sample	BioSample 1	S16 (F020992)	| Symbols: ATKDSA2, ATKSDA | Aldolase superfamily protein | chr1:5588123-5590469 REVERSE LENGTH=291	AT1G16340.1,AT1G16340.2,AT1G16340.3,AT1G16340.4	TAIR10_pep_20101214_contaminants.fasta	31676.1	1	3	3	8	0.00574	0.134
201210Orbi_Dave_Gelsample (1)	Uncategorized Sample	BioSample 1	P15 (F020879)	| Symbols: PAB1 | proteasome subunit PAB1 | chr1:5623122-5625439 FORWARD LENGTH=235	AT1G16470.1,AT1G16470.2,AT1G79210.1,AT1G79210.2,AT1G79210.3	TAIR10_pep_20101214_contaminants.fasta	25733.7	0.998	2	2	18	0.0137	0.378
201211Orbi_Dave_Gelsample2	Uncategorized Sample	BioSample 1	S27 (F021003)	| Symbols: PAB1 | proteasome subunit PAB1 | chr1:5623122-5625439 FORWARD LENGTH=235	AT1G16470.1,AT1G16470.2,AT1G79210.1,AT1G79210.2,AT1G79210.3	TAIR10_pep_20101214_contaminants.fasta	25733.7	1	7	7	7	0.00655	0.288
201211Orbi_Dave_Gelsample2	Uncategorized Sample	BioSample 1	S19 (F020995)	| Symbols: | uridylyltransferase-related | chr1:5773796-5776125 FORWARD LENGTH=290	AT1G16880.1	TAIR10_pep_20101214_contaminants.fasta	31295.8	1	6	7	15	0.0116	0.193
201210Orbi_Dave_Gelsample (1)	Uncategorized Sample	BioSample 1	P15 (F020879)	| Symbols: | uridylyltransferase-related | chr1:5773796-5776125 FORWARD LENGTH=290	AT1G16880.1,AT1G16880.2	TAIR10_pep_20101214_contaminants.fasta	31295.8	0.998	2	2	4	0.003	0.0828
201210Orbi_Dave_Gelsample (1)	Uncategorized Sample	BioSample 1	P49 (F020930)	| Symbols: GER2 | NAD(P)-binding Rossmann-fold superfamily protein | chr1:6154478-6155596 REVERSE LENGTH=328	AT1G17890.1,AT1G17890.2,AT1G17890.3	TAIR10_pep_20101214_contaminants.fasta	35421.8	1	3	3	5	0.0033	0.132
201211Orbi_Dave_Gelsample2	Uncategorized Sample	BioSample 1	S16 (F020992)	| Symbols: GER2 | NAD(P)-binding Rossmann-fold superfamily protein | chr1:6154478-6155596 REVERSE LENGTH=328	AT1G17890.1,AT1G17890.2,AT1G17890.3	TAIR10_pep_20101214_contaminants.fasta	35421.8	1	7	7	14	0.0101	0.248
201211Orbi_Dave_Gelsample2	Uncategorized Sample	BioSample 1	S17 (F020993)	| Symbols: GER2 | NAD(P)-binding Rossmann-fold superfamily protein | chr1:6154478-6155596 REVERSE LENGTH=328	AT1G17890.1,AT1G17890.2,AT1G17890.3	TAIR10_pep_20101214_contaminants.fasta	35421.8	1	4	4	12	0.00861	0.191
201210Orbi_Dave_Gelsample (1)	Uncategorized Sample	BioSample 1	P08 (F020969)	| Symbols: | Translation elongation factor EF1A/initiation factor IF2gamma family protein | chr1:6214236-6218211 REVERSE LENGTH=532	AT1G18070.1,AT1G18070.2,AT1G18070.3	TAIR10_pep_20101214_contaminants.fasta	59242.4	0.998	2	2	4	0.0053	0.0451
201211Orbi_Dave_Gelsample2	Uncategorized Sample	BioSample 1	S03 (F020979)	| Symbols: | Translation elongation factor EF1A/initiation factor IF2gamma family protein | chr1:6214236-6218211 REVERSE LENGTH=532	AT1G18070.1,AT1G18070.2,AT1G18070.3	TAIR10_pep_20101214_contaminants.fasta	59242.4	1	2	2	10	0.0065	0.176
201210Orbi_Dave_Gelsample (1)	Uncategorized Sample	BioSample 1	P48 (F020929)	| Symbols: ATLFNR2, FNR2 | ferredoxin-NADP(+)-oxidoreductase 2 | chr1:6942851-6944868 FORWARD LENGTH=369	AT1G20020.1,AT1G20020.3	TAIR10_pep_20101214_contaminants.fasta	41169	0.998	2	2	16	0.0102	0.386
201210Orbi_Dave_Gelsample (1)	Uncategorized Sample	BioSample 1	P49 (F020930)	| Symbols: ATLFNR2, FNR2 | ferredoxin-NADP(+)-oxidoreductase 2 | chr1:6942851-6944868 FORWARD LENGTH=369	AT1G20020.1,AT1G20020.3	TAIR10_pep_20101214_contaminants.fasta	41169	1	11	15	8	0.00602	0.136
201210Orbi_Dave_Gelsample (1)	Uncategorized Sample	BioSample 1	P50 (F020931)	| Symbols: ATLFNR2, FNR2 | ferredoxin-NADP(+)-oxidoreductase 2 | chr1:6942851-6944868 FORWARD LENGTH=369	AT1G20020.1,AT1G20020.3	TAIR10_pep_20101214_contaminants.fasta	41169	1	10	10	29	0.0174	0.312
201210Orbi_Dave_Gelsample (1)	Uncategorized Sample	BioSample 1	P53 (F020934)	| Symbols: ATLFNR2, FNR2 | ferredoxin-NADP(+)-oxidoreductase 2 | chr1:6942851-6944868 FORWARD LENGTH=369	AT1G20020.1,AT1G20020.3	TAIR10_pep_20101214_contaminants.fasta	41169	1	4	4	17	0.0109	0.228
201211Orbi_Dave_Gelsample2	Uncategorized Sample	BioSample 1	S16 (F020992)	| Symbols: ATLFNR2, FNR2 | ferredoxin-NADP(+)-oxidoreductase 2 | chr1:6942851-6944868 FORWARD LENGTH=369	AT1G20020.1,AT1G20020.3	TAIR10_pep_20101214_contaminants.fasta	41169	1	3	3	6	0.00431	0.117
201211Orbi_Dave_Gelsample2	Uncategorized Sample	BioSample 1	S52 (F021049)	| Symbols: ATLFNR2, FNR2 | ferredoxin-NADP(+)-oxidoreductase 2 | chr1:6942851-6944868 FORWARD LENGTH=369	AT1G20020.1,AT1G20020.3	TAIR10_pep_20101214_contaminants.fasta	41169	1	6	6	8	0.00498	0.228
201211Orbi_Dave_Gelsample2	Uncategorized Sample	BioSample 1	S06 (F020982)	| Symbols: | Phosphofructokinase family protein | chr1:7297467-7301336 REVERSE LENGTH=614	AT1G20950.1	TAIR10_pep_20101214_contaminants.fasta	67120.5	1	5	5	6	0.0056	0.0733
201210Orbi_Dave_Gelsample (1)	Uncategorized Sample	BioSample 1	P62 (F020943)	| Symbols: PBC1 | proteasome beta subunit C1 | chr1:7626394-7628070 FORWARD LENGTH=204	AT1G21720.1,AT1G77440.1,AT1G77440.2	TAIR10_pep_20101214_contaminants.fasta	22759.8	1	4	5	7	0.0056	0.206
201211Orbi_Dave_Gelsample2	Uncategorized Sample	BioSample 1	S32 (F021014)	| Symbols: PBC1 | proteasome beta subunit C1 | chr1:7626394-7628070 FORWARD LENGTH=204	AT1G21720.1,AT1G77440.1,AT1G77440.2	TAIR10_pep_20101214_contaminants.fasta	22759.8	1	3	4	6	0.00396	0.137
201210Orbi_Dave_Gelsample (1)	Uncategorized Sample	BioSample 1	P29 (F020912)	| Symbols: PGM3 | Phosphoglucomutase/phosphomannomutase family protein | chr1:8219946-8224186 FORWARD LENGTH=583	AT1G23190.1	TAIR10_pep_20101214_contaminants.fasta	63172	1	36	47	13	0.0113	0.181
201210Orbi_Dave_Gelsample (1)	Uncategorized Sample	BioSample 1	P32 (F020914)	| Symbols: PGM3 | Phosphoglucomutase/phosphomannomutase family protein | chr1:8219946-8224186 FORWARD LENGTH=583	AT1G23190.1	TAIR10_pep_20101214_contaminants.fasta	63172	1	30	39	85	0.0496	0.765
201211Orbi_Dave_Gelsample2	Uncategorized Sample	BioSample 1	S05 (F020981)	| Symbols: PGM3 | Phosphoglucomutase/phosphomannomutase family protein | chr1:8219946-8224186 FORWARD LENGTH=583	AT1G23190.1	TAIR10_pep_20101214_contaminants.fasta	63172	1	3	3	3	0.00207	0.0909
201211Orbi_Dave_Gelsample2	Uncategorized Sample	BioSample 1	S05 (F020981)	| Symbols: GGT1, AOAT1, GGAT1 | glutamate:glyoxylate aminotransferase | chr1:8268720-8271329 REVERSE LENGTH=481	AT1G23310.1	TAIR10_pep_20101214_contaminants.fasta	53302.6	1	25	29	55	0.038	0.611
201211Orbi_Dave_Gelsample2	Uncategorized Sample	BioSample 1	S31 (F021013)	| Symbols: GGT1, AOAT1, GGAT1 | glutamate:glyoxylate aminotransferase | chr1:8268720-8271329 REVERSE LENGTH=481	AT1G23310.1	TAIR10_pep_20101214_contaminants.fasta	53302.6	1	4	4	8	0.00615	0.0748
201211Orbi_Dave_Gelsample2	Uncategorized Sample	BioSample 1	S33 (F021015)	| Symbols: GGT1, AOAT1, GGAT1 | glutamate:glyoxylate aminotransferase | chr1:8268720-8271329 REVERSE LENGTH=481	AT1G23310.1	TAIR10_pep_20101214_contaminants.fasta	53302.6	1	10	10	19	0.0161	0.187
201211Orbi_Dave_Gelsample2	Uncategorized Sample	BioSample 1	S35 (F021017)	| Symbols: GGT1, AOAT1, GGAT1 | glutamate:glyoxylate aminotransferase | chr1:8268720-8271329 REVERSE LENGTH=481	AT1G23310.1	TAIR10_pep_20101214_contaminants.fasta	53302.6	1	6	6	11	0.00857	0.127
201211Orbi_Dave_Gelsample2	Uncategorized Sample	BioSample 1	S37 (F021019)	| Symbols: GGT1, AOAT1, GGAT1 | glutamate:glyoxylate aminotransferase | chr1:8268720-8271329 REVERSE LENGTH=481	AT1G23310.1	TAIR10_pep_20101214_contaminants.fasta	53302.6	1	4	4	7	0.00548	0.0748
201210Orbi_Dave_Gelsample (1)	Uncategorized Sample	BioSample 1	P37 (F020918)	| Symbols: GGT1, AOAT1, GGAT1 | glutamate:glyoxylate aminotransferase | chr1:8268720-8271329 REVERSE LENGTH=481	AT1G23310.1,AT1G23310.2	TAIR10_pep_20101214_contaminants.fasta	53302.6	1	4	4	4	0.0029	0.123
201210Orbi_Dave_Gelsample (1)	Uncategorized Sample	BioSample 1	P58 (F020939)	| Symbols: GGT1, AOAT1, GGAT1 | glutamate:glyoxylate aminotransferase | chr1:8268720-8271329 REVERSE LENGTH=481	AT1G23310.1,AT1G23310.2	TAIR10_pep_20101214_contaminants.fasta	53302.6	1	4	4	7	0.0051	0.0915
201210Orbi_Dave_Gelsample (1)	Uncategorized Sample	BioSample 1	P48 (F020929)	| Symbols: | Oxidoreductase, zinc-binding dehydrogenase family protein | chr1:8398245-8399656 REVERSE LENGTH=386	AT1G23740.1	TAIR10_pep_20101214_contaminants.fasta	40986.1	1	8	9	11	0.0082	0.308
201211Orbi_Dave_Gelsample2	Uncategorized Sample	BioSample 1	S14 (F020990)	| Symbols: | Oxidoreductase, zinc-binding dehydrogenase family protein | chr1:8398245-8399656 REVERSE LENGTH=386	AT1G23740.1	TAIR10_pep_20101214_contaminants.fasta	40986.1	1	24	34	58	0.0437	0.663
201210Orbi_Dave_Gelsample (1)	Uncategorized Sample	BioSample 1	P15 (F020879)	| Symbols: APT1, ATAPT1 | adenine phosphoribosyl transferase 1 | chr1:9532042-9533807 FORWARD LENGTH=243	AT1G27450.1,AT1G27450.2,AT1G27450.3	TAIR10_pep_20101214_contaminants.fasta	26397.1	1	3	3	5	0.0037	0.148
201210Orbi_Dave_Gelsample (1)	Uncategorized Sample	BioSample 1	P16 (F020880)	| Symbols: APT1, ATAPT1 | adenine phosphoribosyl transferase 1 | chr1:9532042-9533807 FORWARD LENGTH=243	AT1G27450.1,AT1G27450.2,AT1G27450.3	TAIR10_pep_20101214_contaminants.fasta	26397.1	1	3	3	3	0.0029	0.165
201210Orbi_Dave_Gelsample (1)	Uncategorized Sample	BioSample 1	P22 (F020887)	| Symbols: APT1, ATAPT1 | adenine phosphoribosyl transferase 1 | chr1:9532042-9533807 FORWARD LENGTH=243	AT1G27450.1,AT1G27450.2,AT1G27450.3	TAIR10_pep_20101214_contaminants.fasta	26397.1	0.998	2	2	3	0.0027	0.123
201211Orbi_Dave_Gelsample2	Uncategorized Sample	BioSample 1	S29 (F021005)	| Symbols: APT1, ATAPT1 | adenine phosphoribosyl transferase 1 | chr1:9532042-9533807 FORWARD LENGTH=243	AT1G27450.1,AT1G27450.2,AT1G27450.3	TAIR10_pep_20101214_contaminants.fasta	26397.1	1	5	6	4	0.0036	0.191
201210Orbi_Dave_Gelsample (1)	Uncategorized Sample	BioSample 1	P42 (F020923)	| Symbols: ATIMD3, IMD3, IPMDH1 | isopropylmalate dehydrogenase 3 | chr1:11142843-11144617 REVERSE LENGTH=404	AT1G31180.1	TAIR10_pep_20101214_contaminants.fasta	43849.1	1	6	8	6	0.0034	0.33
201210Orbi_Dave_Gelsample (1)	Uncategorized Sample	BioSample 1	P43 (F020924)	| Symbols: ATIMD3, IMD3, IPMDH1 | isopropylmalate dehydrogenase 3 | chr1:11142843-11144617 REVERSE LENGTH=404	AT1G31180.1	TAIR10_pep_20101214_contaminants.fasta	43849.1	1	13	19	73	0.0412	0.605
201210Orbi_Dave_Gelsample (1)	Uncategorized Sample	BioSample 1	P44 (F020925)	| Symbols: ATIMD3, IMD3, IPMDH1 | isopropylmalate dehydrogenase 3 | chr1:11142843-11144617 REVERSE LENGTH=404	AT1G31180.1	TAIR10_pep_20101214_contaminants.fasta	43849.1	1	13	20	40	0.0209	0.547
201211Orbi_Dave_Gelsample2	Uncategorized Sample	BioSample 1	S50 (F021047)	| Symbols: ATIMD3, IMD3, IPMDH1 | isopropylmalate dehydrogenase 3 | chr1:11142843-11144617 REVERSE LENGTH=404	AT1G31180.1	TAIR10_pep_20101214_contaminants.fasta	43849.1	1	11	11	18	0.0114	0.282
201210Orbi_Dave_Gelsample (1)	Uncategorized Sample	BioSample 1	P42 (F020923)	| Symbols: PRK | phosphoribulokinase | chr1:11532668-11534406 FORWARD LENGTH=395	AT1G32060.1	TAIR10_pep_20101214_contaminants.fasta	44465.3	1	4	4	7	0.0054	0.124
201210Orbi_Dave_Gelsample (1)	Uncategorized Sample	BioSample 1	P43 (F020924)	| Symbols: PRK | phosphoribulokinase | chr1:11532668-11534406 FORWARD LENGTH=395	AT1G32060.1	TAIR10_pep_20101214_contaminants.fasta	44465.3	1	6	6	13	0.0068	0.218
201210Orbi_Dave_Gelsample (1)	Uncategorized Sample	BioSample 1	P44 (F020925)	| Symbols: PRK | phosphoribulokinase | chr1:11532668-11534406 FORWARD LENGTH=395	AT1G32060.1	TAIR10_pep_20101214_contaminants.fasta	44465.3	1	6	6	14	0.0079	0.187
201210Orbi_Dave_Gelsample (1)	Uncategorized Sample	BioSample 1	P45 (F020926)	| Symbols: PRK | phosphoribulokinase | chr1:11532668-11534406 FORWARD LENGTH=395	AT1G32060.1	TAIR10_pep_20101214_contaminants.fasta	44465.3	1	6	6	11	0.008	0.149
201211Orbi_Dave_Gelsample2	Uncategorized Sample	BioSample 1	S50 (F021047)	| Symbols: PRK | phosphoribulokinase | chr1:11532668-11534406 FORWARD LENGTH=395	AT1G32060.1	TAIR10_pep_20101214_contaminants.fasta	44465.3	1	6	6	10	0.00636	0.152
201210Orbi_Dave_Gelsample (1)	Uncategorized Sample	BioSample 1	P37 (F020918)	| Symbols: PKp3 | plastidial pyruvate kinase 3 | chr1:11712205-11714963 FORWARD LENGTH=571	AT1G32440.1	TAIR10_pep_20101214_contaminants.fasta	62615.8	1	4	4	9	0.0066	0.119
201211Orbi_Dave_Gelsample2	Uncategorized Sample	BioSample 1	S57 (F021054)	| Symbols: PKp3 | plastidial pyruvate kinase 3 | chr1:11712205-11714963 FORWARD LENGTH=571	AT1G32440.1	TAIR10_pep_20101214_contaminants.fasta	62615.8	1	6	6	8	0.00511	0.144
201210Orbi_Dave_Gelsample (1)	Uncategorized Sample	BioSample 1	P56 (F020937)	| Symbols: | alpha/beta-Hydrolases superfamily protein | chr1:13026320-13027463 FORWARD LENGTH=310	AT1G35420.1,AT1G35420.2	TAIR10_pep_20101214_contaminants.fasta	34167.5	0.998	2	2	3	0.0025	0.0581
201211Orbi_Dave_Gelsample2	Uncategorized Sample	BioSample 1	S53 (F021050)	| Symbols: | alpha/beta-Hydrolases superfamily protein | chr1:13026320-13027463 FORWARD LENGTH=310	AT1G35420.1,AT1G35420.2	TAIR10_pep_20101214_contaminants.fasta	34167.5	1	6	6	9	0.00663	0.206
201210Orbi_Dave_Gelsample (1)	Uncategorized Sample	BioSample 1	P46 (F020927)	| Symbols: ANNAT1, OXY5, ATOXY5 | annexin 1 | chr1:13225304-13226939 FORWARD LENGTH=317	AT1G35720.1	TAIR10_pep_20101214_contaminants.fasta	36204.9	1	11	11	13	0.0092	0.372
201211Orbi_Dave_Gelsample2	Uncategorized Sample	BioSample 1	S37 (F021019)	| Symbols: ANNAT1, OXY5, ATOXY5 | annexin 1 | chr1:13225304-13226939 FORWARD LENGTH=317	AT1G35720.1	TAIR10_pep_20101214_contaminants.fasta	36204.9	1	5	5	19	0.0121	0.416
201210Orbi_Dave_Gelsample (1)	Uncategorized Sample	BioSample 1	P15 (F020879)	| Symbols: GAPB | glyceraldehyde-3-phosphate dehydrogenase B subunit | chr1:16127552-16129584 FORWARD LENGTH=447	AT1G42970.1	TAIR10_pep_20101214_contaminants.fasta	47659.3	1	5	5	6	0.0044	0.161
201210Orbi_Dave_Gelsample (1)	Uncategorized Sample	BioSample 1	P38 (F020919)	| Symbols: GAPB | glyceraldehyde-3-phosphate dehydrogenase B subunit | chr1:16127552-16129584 FORWARD LENGTH=447	AT1G42970.1	TAIR10_pep_20101214_contaminants.fasta	47659.3	1	4	5	7	0.0048	0.136
201210Orbi_Dave_Gelsample (1)	Uncategorized Sample	BioSample 1	P40 (F020921)	| Symbols: GAPB | glyceraldehyde-3-phosphate dehydrogenase B subunit | chr1:16127552-16129584 FORWARD LENGTH=447	AT1G42970.1	TAIR10_pep_20101214_contaminants.fasta	47659.3	1	10	13	21	0.0117	0.233
201210Orbi_Dave_Gelsample (1)	Uncategorized Sample	BioSample 1	P41 (F020922)	| Symbols: GAPB | glyceraldehyde-3-phosphate dehydrogenase B subunit | chr1:16127552-16129584 FORWARD LENGTH=447	AT1G42970.1	TAIR10_pep_20101214_contaminants.fasta	47659.3	0.998	2	2	2	0.0014	0.0671
201210Orbi_Dave_Gelsample (1)	Uncategorized Sample	BioSample 1	P42 (F020923)	| Symbols: GAPB | glyceraldehyde-3-phosphate dehydrogenase B subunit | chr1:16127552-16129584 FORWARD LENGTH=447	AT1G42970.1	TAIR10_pep_20101214_contaminants.fasta	47659.3	1	8	9	13	0.0101	0.244
201210Orbi_Dave_Gelsample (1)	Uncategorized Sample	BioSample 1	P43 (F020924)	| Symbols: GAPB | glyceraldehyde-3-phosphate dehydrogenase B subunit | chr1:16127552-16129584 FORWARD LENGTH=447	AT1G42970.1	TAIR10_pep_20101214_contaminants.fasta	47659.3	1	3	3	4	0.0021	0.0828
201210Orbi_Dave_Gelsample (1)	Uncategorized Sample	BioSample 1	P44 (F020925)	| Symbols: GAPB | glyceraldehyde-3-phosphate dehydrogenase B subunit | chr1:16127552-16129584 FORWARD LENGTH=447	AT1G42970.1	TAIR10_pep_20101214_contaminants.fasta	47659.3	1	10	11	16	0.009	0.253
201210Orbi_Dave_Gelsample (1)	Uncategorized Sample	BioSample 1	P51 (F020932)	| Symbols: GAPB | glyceraldehyde-3-phosphate dehydrogenase B subunit | chr1:16127552-16129584 FORWARD LENGTH=447	AT1G42970.1	TAIR10_pep_20101214_contaminants.fasta	47659.3	1	3	3	5	0.0039	0.0783
201211Orbi_Dave_Gelsample2	Uncategorized Sample	BioSample 1	S08 (F020984)	| Symbols: GAPB | glyceraldehyde-3-phosphate dehydrogenase B subunit | chr1:16127552-16129584 FORWARD LENGTH=447	AT1G42970.1	TAIR10_pep_20101214_contaminants.fasta	47659.3	1	4	4	6	0.00396	0.101
201211Orbi_Dave_Gelsample2	Uncategorized Sample	BioSample 1	S12 (F020988)	| Symbols: GAPB | glyceraldehyde-3-phosphate dehydrogenase B subunit | chr1:16127552-16129584 FORWARD LENGTH=447	AT1G42970.1	TAIR10_pep_20101214_contaminants.fasta	47659.3	1	2	2	5	0.00346	0.0492
201211Orbi_Dave_Gelsample2	Uncategorized Sample	BioSample 1	S50 (F021047)	| Symbols: GAPB | glyceraldehyde-3-phosphate dehydrogenase B subunit | chr1:16127552-16129584 FORWARD LENGTH=447	AT1G42970.1	TAIR10_pep_20101214_contaminants.fasta	47659.3	1	20	24	38	0.0242	0.418
201211Orbi_Dave_Gelsample2	Uncategorized Sample	BioSample 1	S52 (F021049)	| Symbols: GAPB | glyceraldehyde-3-phosphate dehydrogenase B subunit | chr1:16127552-16129584 FORWARD LENGTH=447	AT1G42970.1	TAIR10_pep_20101214_contaminants.fasta	47659.3	1	3	3	4	0.00249	0.0828
201211Orbi_Dave_Gelsample2	Uncategorized Sample	BioSample 1	S55 (F021052)	| Symbols: GAPB | glyceraldehyde-3-phosphate dehydrogenase B subunit | chr1:16127552-16129584 FORWARD LENGTH=447	AT1G42970.1	TAIR10_pep_20101214_contaminants.fasta	47659.3	1	17	18	31	0.0209	0.362
201211Orbi_Dave_Gelsample2	Uncategorized Sample	BioSample 1	S55 (F021052)	| Symbols: ARP1, emb2207, RPL3A, RP1 | ribosomal protein 1 | chr1:16266992-16268631 FORWARD LENGTH=389	AT1G43170.1,AT1G43170.2,AT1G43170.3,AT1G43170.4,AT1G43170.5,AT1G43170.6,AT1G43170.7,AT1G43170.8,AT1G43170.9	TAIR10_pep_20101214_contaminants.fasta	44559.6	1	4	4	5	0.00336	0.0925
201210Orbi_Dave_Gelsample (1)	Uncategorized Sample	BioSample 1	P56 (F020937)	| Symbols: RD21, RD21A | Granulin repeat cysteine protease family protein | chr1:17283139-17285609 REVERSE LENGTH=462	AT1G47128.1	TAIR10_pep_20101214_contaminants.fasta	50967.2	1	6	8	15	0.0127	0.154
201211Orbi_Dave_Gelsample2	Uncategorized Sample	BioSample 1	S19 (F020995)	| Symbols: RD21, RD21A | Granulin repeat cysteine protease family protein | chr1:17283139-17285609 REVERSE LENGTH=462	AT1G47128.1	TAIR10_pep_20101214_contaminants.fasta	50967.2	1	2	2	3	0.00232	0.0649
201210Orbi_Dave_Gelsample (1)	Uncategorized Sample	BioSample 1	P42 (F020923)	| Symbols: | Serine protease inhibitor (SERPIN) family protein | chr1:17558271-17560061 FORWARD LENGTH=391	AT1G47710.1	TAIR10_pep_20101214_contaminants.fasta	42640.3	1	5	5	9	0.007	0.156
201211Orbi_Dave_Gelsample2	Uncategorized Sample	BioSample 1	S50 (F021047)	| Symbols: | Serine protease inhibitor (SERPIN) family protein | chr1:17558271-17560061 FORWARD LENGTH=391	AT1G47710.1	TAIR10_pep_20101214_contaminants.fasta	42640.3	1	13	13	19	0.0121	0.45
201210Orbi_Dave_Gelsample (1)	Uncategorized Sample	BioSample 1	P34 (F020916)	| Symbols: mtLPD1 | mitochondrial lipoamide dehydrogenase 1 | chr1:17717432-17719141 REVERSE LENGTH=507	AT1G48030.1,AT1G48030.2	TAIR10_pep_20101214_contaminants.fasta	53988.6	1	4	4	5	0.0041	0.0907
201210Orbi_Dave_Gelsample (1)	Uncategorized Sample	BioSample 1	P36 (F020967)	| Symbols: mtLPD1 | mitochondrial lipoamide dehydrogenase 1 | chr1:17717432-17719141 REVERSE LENGTH=507	AT1G48030.1,AT1G48030.2	TAIR10_pep_20101214_contaminants.fasta	53988.6	0.998	2	2	2	0.0032	0.0592
201210Orbi_Dave_Gelsample (1)	Uncategorized Sample	BioSample 1	P37 (F020918)	| Symbols: mtLPD1 | mitochondrial lipoamide dehydrogenase 1 | chr1:17717432-17719141 REVERSE LENGTH=507	AT1G48030.1,AT1G48030.2	TAIR10_pep_20101214_contaminants.fasta	53988.6	1	8	10	17	0.0124	0.252
201211Orbi_Dave_Gelsample2	Uncategorized Sample	BioSample 1	S05 (F020981)	| Symbols: mtLPD1 | mitochondrial lipoamide dehydrogenase 1 | chr1:17717432-17719141 REVERSE LENGTH=507	AT1G48030.1,AT1G48030.2	TAIR10_pep_20101214_contaminants.fasta	53988.6	1	4	4	5	0.00346	0.201
201211Orbi_Dave_Gelsample2	Uncategorized Sample	BioSample 1	S57 (F021054)	| Symbols: mtLPD1 | mitochondrial lipoamide dehydrogenase 1 | chr1:17717432-17719141 REVERSE LENGTH=507	AT1G48030.1,AT1G48030.2	TAIR10_pep_20101214_contaminants.fasta	53988.6	1	3	4	5	0.00319	0.353
201210Orbi_Dave_Gelsample (1)	Uncategorized Sample	BioSample 1	P06 (F020905)	| Symbols: ACT8 | actin 8 | chr1:18216539-18217947 FORWARD LENGTH=377	AT1G49240.1,AT3G18780.2	TAIR10_pep_20101214_contaminants.fasta	41863.5	0.998	2	2	2	0.0013	0.0557
201210Orbi_Dave_Gelsample (1)	Uncategorized Sample	BioSample 1	P10 (F020875)	| Symbols: ACT8 | actin 8 | chr1:18216539-18217947 FORWARD LENGTH=377	AT1G49240.1,AT3G18780.2	TAIR10_pep_20101214_contaminants.fasta	41863.5	0.998	2	2	2	0.0012	0.0557
201210Orbi_Dave_Gelsample (1)	Uncategorized Sample	BioSample 1	P39 (F020920)	| Symbols: ACT8 | actin 8 | chr1:18216539-18217947 FORWARD LENGTH=377	AT1G49240.1,AT3G18780.2	TAIR10_pep_20101214_contaminants.fasta	41863.5	1	2	2	3	0.002	0.0902
201210Orbi_Dave_Gelsample (1)	Uncategorized Sample	BioSample 1	P41 (F020922)	| Symbols: ACT8 | actin 8 | chr1:18216539-18217947 FORWARD LENGTH=377	AT1G49240.1,AT3G18780.2	TAIR10_pep_20101214_contaminants.fasta	41863.5	1	9	11	14	0.0101	0.321
201210Orbi_Dave_Gelsample (1)	Uncategorized Sample	BioSample 1	P42 (F020923)	| Symbols: ACT8 | actin 8 | chr1:18216539-18217947 FORWARD LENGTH=377	AT1G49240.1,AT3G18780.2	TAIR10_pep_20101214_contaminants.fasta	41863.5	0.998	2	2	3	0.0023	0.0902
201210Orbi_Dave_Gelsample (1)	Uncategorized Sample	BioSample 1	P43 (F020924)	| Symbols: ACT8 | actin 8 | chr1:18216539-18217947 FORWARD LENGTH=377	AT1G49240.1,AT3G18780.2	TAIR10_pep_20101214_contaminants.fasta	41863.5	1	7	7	13	0.0068	0.223
201210Orbi_Dave_Gelsample (1)	Uncategorized Sample	BioSample 1	P44 (F020925)	| Symbols: ACT8 | actin 8 | chr1:18216539-18217947 FORWARD LENGTH=377	AT1G49240.1,AT3G18780.2	TAIR10_pep_20101214_contaminants.fasta	41863.5	1	13	17	38	0.0215	0.496
201211Orbi_Dave_Gelsample2	Uncategorized Sample	BioSample 1	S50 (F021047)	| Symbols: ACT8 | actin 8 | chr1:18216539-18217947 FORWARD LENGTH=377	AT1G49240.1,AT3G18780.2	TAIR10_pep_20101214_contaminants.fasta	41863.5	1	2	2	3	0.00191	0.265
201210Orbi_Dave_Gelsample (1)	Uncategorized Sample	BioSample 1	P29 (F020912)	| Symbols: THFS | 10-formyltetrahydrofolate synthetase | chr1:18702064-18704687 FORWARD LENGTH=634	AT1G50480.1	TAIR10_pep_20101214_contaminants.fasta	67803.3	1	3	3	4	0.0023	0.0647
201210Orbi_Dave_Gelsample (1)	Uncategorized Sample	BioSample 1	P32 (F020914)	| Symbols: THFS | 10-formyltetrahydrofolate synthetase | chr1:18702064-18704687 FORWARD LENGTH=634	AT1G50480.1	TAIR10_pep_20101214_contaminants.fasta	67803.3	1	5	5	7	0.0051	0.107
201211Orbi_Dave_Gelsample2	Uncategorized Sample	BioSample 1	S05 (F020981)	| Symbols: THFS | 10-formyltetrahydrofolate synthetase | chr1:18702064-18704687 FORWARD LENGTH=634	AT1G50480.1	TAIR10_pep_20101214_contaminants.fasta	67803.3	1	36	53	118	0.0815	0.708
201211Orbi_Dave_Gelsample2	Uncategorized Sample	BioSample 1	S06 (F020982)	| Symbols: THFS | 10-formyltetrahydrofolate synthetase | chr1:18702064-18704687 FORWARD LENGTH=634	AT1G50480.1	TAIR10_pep_20101214_contaminants.fasta	67803.3	1	7	7	12	0.0112	0.147
201210Orbi_Dave_Gelsample (1)	Uncategorized Sample	BioSample 1	P32 (F020914)	| Symbols: UBP6, ATUBP6 | ubiquitin-specific protease 6 | chr1:19175805-19179894 REVERSE LENGTH=482	AT1G51710.1	TAIR10_pep_20101214_contaminants.fasta	53696.4	0.998	2	2	2	0.0015	0.0747
201210Orbi_Dave_Gelsample (1)	Uncategorized Sample	BioSample 1	P34 (F020916)	| Symbols: UBP6, ATUBP6 | ubiquitin-specific protease 6 | chr1:19175805-19179894 REVERSE LENGTH=482	AT1G51710.1	TAIR10_pep_20101214_contaminants.fasta	53696.4	1	19	28	84	0.0692	0.519
201211Orbi_Dave_Gelsample2	Uncategorized Sample	BioSample 1	S08 (F020984)	| Symbols: UBP6, ATUBP6 | ubiquitin-specific protease 6 | chr1:19175805-19179894 REVERSE LENGTH=482	AT1G51710.1	TAIR10_pep_20101214_contaminants.fasta	53696.4	1	6	6	10	0.0066	0.116
201211Orbi_Dave_Gelsample2	Uncategorized Sample	BioSample 1	S09 (F020985)	| Symbols: UBP6, ATUBP6 | ubiquitin-specific protease 6 | chr1:19175805-19179894 REVERSE LENGTH=482	AT1G51710.1	TAIR10_pep_20101214_contaminants.fasta	53696.4	1	15	15	34	0.0225	0.324
201210Orbi_Dave_Gelsample (1)	Uncategorized Sample	BioSample 1	P49 (F020930)	| Symbols: LysoPL2 | lysophospholipase 2 | chr1:19651378-19652576 FORWARD LENGTH=332	AT1G52760.1	TAIR10_pep_20101214_contaminants.fasta	36976.6	1	4	4	7	0.0042	0.169
201211Orbi_Dave_Gelsample2	Uncategorized Sample	BioSample 1	S16 (F020992)	| Symbols: LysoPL2 | lysophospholipase 2 | chr1:19651378-19652576 FORWARD LENGTH=332	AT1G52760.1	TAIR10_pep_20101214_contaminants.fasta	36976.6	1	5	5	8	0.00574	0.154
201210Orbi_Dave_Gelsample (1)	Uncategorized Sample	BioSample 1	P47 (F020928)	| Symbols: mMDH1 | Lactate/malate dehydrogenase family protein | chr1:19854966-19856802 REVERSE LENGTH=341	AT1G53240.1	TAIR10_pep_20101214_contaminants.fasta	35805.2	0.998	2	2	3	0.002	0.0352
201210Orbi_Dave_Gelsample (1)	Uncategorized Sample	BioSample 1	P48 (F020929)	| Symbols: mMDH1 | Lactate/malate dehydrogenase family protein | chr1:19854966-19856802 REVERSE LENGTH=341	AT1G53240.1	TAIR10_pep_20101214_contaminants.fasta	35805.2	1	8	10	14	0.0105	0.326
201210Orbi_Dave_Gelsample (1)	Uncategorized Sample	BioSample 1	P49 (F020930)	| Symbols: mMDH1 | Lactate/malate dehydrogenase family protein | chr1:19854966-19856802 REVERSE LENGTH=341	AT1G53240.1	TAIR10_pep_20101214_contaminants.fasta	35805.2	1	16	24	39	0.0249	0.545
201210Orbi_Dave_Gelsample (1)	Uncategorized Sample	BioSample 1	P50 (F020931)	| Symbols: mMDH1 | Lactate/malate dehydrogenase family protein | chr1:19854966-19856802 REVERSE LENGTH=341	AT1G53240.1	TAIR10_pep_20101214_contaminants.fasta	35805.2	1	15	22	7	0.00527	0.152
201211Orbi_Dave_Gelsample2	Uncategorized Sample	BioSample 1	S14 (F020990)	| Symbols: mMDH1 | Lactate/malate dehydrogenase family protein | chr1:19854966-19856802 REVERSE LENGTH=341	AT1G53240.1	TAIR10_pep_20101214_contaminants.fasta	35805.2	1	3	4	32	0.023	0.478
201211Orbi_Dave_Gelsample2	Uncategorized Sample	BioSample 1	S16 (F020992)	| Symbols: mMDH1 | Lactate/malate dehydrogenase family protein | chr1:19854966-19856802 REVERSE LENGTH=341	AT1G53240.1	TAIR10_pep_20101214_contaminants.fasta	35805.2	1	11	14	23	0.0162	0.425
201211Orbi_Dave_Gelsample2	Uncategorized Sample	BioSample 1	S17 (F020993)	| Symbols: mMDH1 | Lactate/malate dehydrogenase family protein | chr1:19854966-19856802 REVERSE LENGTH=341	AT1G53240.1	TAIR10_pep_20101214_contaminants.fasta	35805.2	1	9	12	7	0.00534	0.123
201211Orbi_Dave_Gelsample2	Uncategorized Sample	BioSample 1	S21 (F020997)	| Symbols: mMDH1 | Lactate/malate dehydrogenase family protein | chr1:19854966-19856802 REVERSE LENGTH=341	AT1G53240.1	TAIR10_pep_20101214_contaminants.fasta	35805.2	1	3	4	9	0.0067	0.393
201210Orbi_Dave_Gelsample (1)	Uncategorized Sample	BioSample 1	P06 (F020905)	| Symbols: TLP18.3 | thylakoid lumen 18.3 kDa protein | chr1:20439533-20440953 FORWARD LENGTH=285	AT1G54780.1	TAIR10_pep_20101214_contaminants.fasta	31139.8	1	6	6	10	0.0067	0.228
201210Orbi_Dave_Gelsample (1)	Uncategorized Sample	BioSample 1	P36 (F020967)	| Symbols: TLP18.3 | thylakoid lumen 18.3 kDa protein | chr1:20439533-20440953 FORWARD LENGTH=285	AT1G54780.1	TAIR10_pep_20101214_contaminants.fasta	31139.8	0.998	2	3	5	0.008	0.0807
201210Orbi_Dave_Gelsample (1)	Uncategorized Sample	BioSample 1	P61 (F020942)	| Symbols: TLP18.3 | thylakoid lumen 18.3 kDa protein | chr1:20439533-20440953 FORWARD LENGTH=285	AT1G54780.1	TAIR10_pep_20101214_contaminants.fasta	31139.8	1	4	4	5	0.0047	0.168
201211Orbi_Dave_Gelsample2	Uncategorized Sample	BioSample 1	S27 (F021003)	| Symbols: TLP18.3 | thylakoid lumen 18.3 kDa protein | chr1:20439533-20440953 FORWARD LENGTH=285	AT1G54780.1	TAIR10_pep_20101214_contaminants.fasta	31139.8	1	7	8	13	0.0103	0.274
201210Orbi_Dave_Gelsample (1)	Uncategorized Sample	BioSample 1	P04 (F020968)	| Symbols: CPN60B, LEN1 | chaperonin 60 beta | chr1:20715717-20718673 REVERSE LENGTH=600	AT1G55490.1,AT1G55490.2	TAIR10_pep_20101214_contaminants.fasta	63809.3	1	10	12	22	0.0557	0.252
201210Orbi_Dave_Gelsample (1)	Uncategorized Sample	BioSample 1	P05 (F020904)	| Symbols: CPN60B, LEN1 | chaperonin 60 beta | chr1:20715717-20718673 REVERSE LENGTH=600	AT1G55490.1,AT1G55490.2	TAIR10_pep_20101214_contaminants.fasta	63809.3	0.998	2	2	2	0.0016	0.0467
201210Orbi_Dave_Gelsample (1)	Uncategorized Sample	BioSample 1	P10 (F020875)	| Symbols: CPN60B, LEN1 | chaperonin 60 beta | chr1:20715717-20718673 REVERSE LENGTH=600	AT1G55490.1,AT1G55490.2	TAIR10_pep_20101214_contaminants.fasta	63809.3	1	48	71	367	0.224	0.745
201210Orbi_Dave_Gelsample (1)	Uncategorized Sample	BioSample 1	P35 (F020917)	| Symbols: CPN60B, LEN1 | chaperonin 60 beta | chr1:20715717-20718673 REVERSE LENGTH=600	AT1G55490.1,AT1G55490.2	TAIR10_pep_20101214_contaminants.fasta	63809.3	1	4	4	5	0.0047	0.107
201210Orbi_Dave_Gelsample (1)	Uncategorized Sample	BioSample 1	P36 (F020967)	| Symbols: CPN60B, LEN1 | chaperonin 60 beta | chr1:20715717-20718673 REVERSE LENGTH=600	AT1G55490.1,AT1G55490.2	TAIR10_pep_20101214_contaminants.fasta	63809.3	0.998	2	2	2	0.0032	0.0433
201211Orbi_Dave_Gelsample2	Uncategorized Sample	BioSample 1	S03 (F020979)	| Symbols: CPN60B, LEN1 | chaperonin 60 beta | chr1:20715717-20718673 REVERSE LENGTH=600	AT1G55490.1,AT1G55490.2,AT3G13470.1	TAIR10_pep_20101214_contaminants.fasta	63809.3	1	4	4	7	0.00499	0.075
201211Orbi_Dave_Gelsample2	Uncategorized Sample	BioSample 1	S50 (F021047)	| Symbols: CPN60B, LEN1 | chaperonin 60 beta | chr1:20715717-20718673 REVERSE LENGTH=600	AT1G55490.1,AT1G55490.2,AT3G13470.1	TAIR10_pep_20101214_contaminants.fasta	63341.5	1	3	3	3	0.00191	0.0587
201210Orbi_Dave_Gelsample (1)	Uncategorized Sample	BioSample 1	P16 (F020880)	| Symbols: LHCA3 | photosystem I light harvesting complex gene 3 | chr1:22700152-22701149 FORWARD LENGTH=273	AT1G61520.1,AT1G61520.2,AT1G61520.3	TAIR10_pep_20101214_contaminants.fasta	29182.9	0.998	2	2	9	0.0085	0.288
201210Orbi_Dave_Gelsample (1)	Uncategorized Sample	BioSample 1	P48 (F020929)	| Symbols: LHCA3 | photosystem I light harvesting complex gene 3 | chr1:22700152-22701149 FORWARD LENGTH=273	AT1G61520.1,AT1G61520.2,AT1G61520.3	TAIR10_pep_20101214_contaminants.fasta	29182.9	0.998	2	3	6	0.0057	0.158
201211Orbi_Dave_Gelsample2	Uncategorized Sample	BioSample 1	S29 (F021005)	| Symbols: LHCA3 | photosystem I light harvesting complex gene 3 | chr1:22700152-22701149 FORWARD LENGTH=273	AT1G61520.1,AT1G61520.2,AT1G61520.3	TAIR10_pep_20101214_contaminants.fasta	29182.9	1	4	5	9	0.00847	0.231
201210Orbi_Dave_Gelsample (1)	Uncategorized Sample	BioSample 1	P45 (F020926)	| Symbols: ACO2, ATACO2 | ACC oxidase 2 | chr1:23082340-23084068 FORWARD LENGTH=320	AT1G62380.1	TAIR10_pep_20101214_contaminants.fasta	36183.8	1	7	10	19	0.0139	0.266
201210Orbi_Dave_Gelsample (1)	Uncategorized Sample	BioSample 1	P46 (F020927)	| Symbols: ACO2, ATACO2 | ACC oxidase 2 | chr1:23082340-23084068 FORWARD LENGTH=320	AT1G62380.1	TAIR10_pep_20101214_contaminants.fasta	36183.8	0.998	2	2	3	0.0021	0.0781
201211Orbi_Dave_Gelsample2	Uncategorized Sample	BioSample 1	S12 (F020988)	| Symbols: ACO2, ATACO2 | ACC oxidase 2 | chr1:23082340-23084068 FORWARD LENGTH=320	AT1G62380.1	TAIR10_pep_20101214_contaminants.fasta	36183.8	1	4	4	6	0.00416	0.128
201211Orbi_Dave_Gelsample2	Uncategorized Sample	BioSample 1	S18 (F020994)	| Symbols: ACO2, ATACO2 | ACC oxidase 2 | chr1:23082340-23084068 FORWARD LENGTH=320	AT1G62380.1	TAIR10_pep_20101214_contaminants.fasta	36183.8	1	2	2	3	0.00281	0.0531
201210Orbi_Dave_Gelsample (1)	Uncategorized Sample	BioSample 1	P16 (F020880)	| Symbols: ATSCO1, ATSCO1/CPEF-G, SCO1 | Translation elongation factor EFG/EF2 protein | chr1:23233622-23236321 REVERSE LENGTH=783	AT1G62750.1	TAIR10_pep_20101214_contaminants.fasta	86059	1	3	3	5	0.0048	0.0549
201210Orbi_Dave_Gelsample (1)	Uncategorized Sample	BioSample 1	P22 (F020887)	| Symbols: ATSCO1, ATSCO1/CPEF-G, SCO1 | Translation elongation factor EFG/EF2 protein | chr1:23233622-23236321 REVERSE LENGTH=783	AT1G62750.1	TAIR10_pep_20101214_contaminants.fasta	86059	1	24	30	56	0.0496	0.421
201211Orbi_Dave_Gelsample2	Uncategorized Sample	BioSample 1	S03 (F020979)	| Symbols: ATSCO1, ATSCO1/CPEF-G, SCO1 | Translation elongation factor EFG/EF2 protein | chr1:23233622-23236321 REVERSE LENGTH=783	AT1G62750.1	TAIR10_pep_20101214_contaminants.fasta	86059	1	38	51	154	0.11	0.57
201210Orbi_Dave_Gelsample (1)	Uncategorized Sample	BioSample 1	P16 (F020880)	| Symbols: | unknown protein; FUNCTIONS IN: molecular_function unknown; INVOLVED IN: biological_process unknown; LOCATED IN: chloroplast, chloroplast stroma; EXPRESSED IN: 22 plant structures; EXPRESSED DURING: 14 growth stages; Has 94 Blast hits to 94 proteins in 35 species: Archae - 6; Bacteria - 10; Metazoa - 21; Fungi - 2; Plants - 48; Viruses - 0; Other Eukaryotes - 7 (source: NCBI BLink). |…	AT1G62780.1	TAIR10_pep_20101214_contaminants.fasta	27220.5	1	11	13	6	0.0039	0.259
201210Orbi_Dave_Gelsample (1)	Uncategorized Sample	BioSample 1	P22 (F020887)	| Symbols: | unknown protein; FUNCTIONS IN: molecular_function unknown; INVOLVED IN: biological_process unknown; LOCATED IN: chloroplast, chloroplast stroma; EXPRESSED IN: 22 plant structures; EXPRESSED DURING: 14 growth stages; Has 94 Blast hits to 94 proteins in 35 species: Archae - 6; Bacteria - 10; Metazoa - 21; Fungi - 2; Plants - 48; Viruses - 0; Other Eukaryotes - 7 (source: NCBI BLink). |…	AT1G62780.1	TAIR10_pep_20101214_contaminants.fasta	27220.5	1	8	10	2	0.0018	0.0609
201211Orbi_Dave_Gelsample2	Uncategorized Sample	BioSample 1	S29 (F021005)	| Symbols: | unknown protein; FUNCTIONS IN: molecular_function unknown; INVOLVED IN: biological_process unknown; LOCATED IN: chloroplast, chloroplast stroma; EXPRESSED IN: 22 plant structures; EXPRESSED DURING: 14 growth stages; Has 94 Blast hits to 94 proteins in 35 species: Archae - 6; Bacteria - 10; Metazoa - 21; Fungi - 2; Plants - 48; Viruses - 0; Other Eukaryotes - 7 (source: NCBI BLink). |…	AT1G62780.1	TAIR10_pep_20101214_contaminants.fasta	27220.5	1	6	6	3	0.002	0.0668
201210Orbi_Dave_Gelsample (1)	Uncategorized Sample	BioSample 1	P54 (F020935)	| Symbols: NRS/ER, UER1 | nucleotide-rhamnose synthase/epimerase-reductase | chr1:23342510-23343859 FORWARD LENGTH=301	AT1G63000.1	TAIR10_pep_20101214_contaminants.fasta	33598.4	1	6	6	7	0.0055	0.219
201211Orbi_Dave_Gelsample2	Uncategorized Sample	BioSample 1	S21 (F020997)	| Symbols: NRS/ER, UER1 | nucleotide-rhamnose synthase/epimerase-reductase | chr1:23342510-23343859 FORWARD LENGTH=301	AT1G63000.1	TAIR10_pep_20101214_contaminants.fasta	33598.4	1	14	19	66	0.0504	0.611
201210Orbi_Dave_Gelsample (1)	Uncategorized Sample	BioSample 1	P34 (F020916)	| Symbols: | GMP synthase (glutamine-hydrolyzing), putative / glutamine amidotransferase, putative | chr1:23604127-23607080 REVERSE LENGTH=534	AT1G63660.1	TAIR10_pep_20101214_contaminants.fasta	59314.8	1	12	14	19	0.0157	0.369
201211Orbi_Dave_Gelsample2	Uncategorized Sample	BioSample 1	S09 (F020985)	| Symbols: | GMP synthase (glutamine-hydrolyzing), putative / glutamine amidotransferase, putative | chr1:23604127-23607080 REVERSE LENGTH=534	AT1G63660.1,AT1G63660.2	TAIR10_pep_20101214_contaminants.fasta	59314.8	1	3	3	4	0.00265	0.0693
201210Orbi_Dave_Gelsample (1)	Uncategorized Sample	BioSample 1	P53 (F020934)	| Symbols: PTAC4, VIPP1 | plastid transcriptionally active 4 | chr1:24236329-24240428 FORWARD LENGTH=330	AT1G65260.1	TAIR10_pep_20101214_contaminants.fasta	36393.7	1	4	4	11	0.0131	0.252
201210Orbi_Dave_Gelsample (1)	Uncategorized Sample	BioSample 1	P54 (F020935)	| Symbols: PTAC4, VIPP1 | plastid transcriptionally active 4 | chr1:24236329-24240428 FORWARD LENGTH=330	AT1G65260.1	TAIR10_pep_20101214_contaminants.fasta	36393.7	1	5	5	3	0.0024	0.0418
201210Orbi_Dave_Gelsample (1)	Uncategorized Sample	BioSample 1	P55 (F020936)	| Symbols: PTAC4, VIPP1 | plastid transcriptionally active 4 | chr1:24236329-24240428 FORWARD LENGTH=330	AT1G65260.1	TAIR10_pep_20101214_contaminants.fasta	36393.7	1	8	11	5	0.0033	0.179
201211Orbi_Dave_Gelsample2	Uncategorized Sample	BioSample 1	S20 (F020996)	| Symbols: PTAC4, VIPP1 | plastid transcriptionally active 4 | chr1:24236329-24240428 FORWARD LENGTH=330	AT1G65260.1	TAIR10_pep_20101214_contaminants.fasta	36393.7	1	26	37	22	0.0176	0.373
201210Orbi_Dave_Gelsample (1)	Uncategorized Sample	BioSample 1	P38 (F020919)	| Symbols: cICDH | cytosolic NADP+-dependent isocitrate dehydrogenase | chr1:24539088-24541861 FORWARD LENGTH=410	AT1G65930.1	TAIR10_pep_20101214_contaminants.fasta	45747.8	1	21	25	49	0.0339	0.556
201210Orbi_Dave_Gelsample (1)	Uncategorized Sample	BioSample 1	P40 (F020921)	| Symbols: cICDH | cytosolic NADP+-dependent isocitrate dehydrogenase | chr1:24539088-24541861 FORWARD LENGTH=410	AT1G65930.1	TAIR10_pep_20101214_contaminants.fasta	45747.8	1	16	19	49	0.0272	0.427
201210Orbi_Dave_Gelsample (1)	Uncategorized Sample	BioSample 1	P43 (F020924)	| Symbols: cICDH | cytosolic NADP+-dependent isocitrate dehydrogenase | chr1:24539088-24541861 FORWARD LENGTH=410	AT1G65930.1	TAIR10_pep_20101214_contaminants.fasta	45747.8	1	38	54	133	0.0695	0.824
201211Orbi_Dave_Gelsample2	Uncategorized Sample	BioSample 1	S16 (F020992)	| Symbols: cICDH | cytosolic NADP+-dependent isocitrate dehydrogenase | chr1:24539088-24541861 FORWARD LENGTH=410	AT1G65930.1	TAIR10_pep_20101214_contaminants.fasta	45747.8	1	4	4	5	0.00359	0.107
201211Orbi_Dave_Gelsample2	Uncategorized Sample	BioSample 1	S55 (F021052)	| Symbols: cICDH | cytosolic NADP+-dependent isocitrate dehydrogenase | chr1:24539088-24541861 FORWARD LENGTH=410	AT1G65930.1	TAIR10_pep_20101214_contaminants.fasta	45747.8	1	22	25	48	0.0323	0.485
201210Orbi_Dave_Gelsample (1)	Uncategorized Sample	BioSample 1	P32 (F020914)	| Symbols: RBCS1A | ribulose bisphosphate carboxylase small chain 1A | chr1:25048465-25049249 REVERSE LENGTH=180	AT1G67090.1	TAIR10_pep_20101214_contaminants.fasta	20216.6	1	6	7	10	0.0073	0.361
201210Orbi_Dave_Gelsample (1)	Uncategorized Sample	BioSample 1	P49 (F020930)	| Symbols: RBCS1A | ribulose bisphosphate carboxylase small chain 1A | chr1:25048465-25049249 REVERSE LENGTH=180	AT1G67090.1	TAIR10_pep_20101214_contaminants.fasta	20216.6	0.998	2	2	2	0.0012	0.122
201210Orbi_Dave_Gelsample (1)	Uncategorized Sample	BioSample 1	P54 (F020935)	| Symbols: RBCS1A | ribulose bisphosphate carboxylase small chain 1A | chr1:25048465-25049249 REVERSE LENGTH=180	AT1G67090.1	TAIR10_pep_20101214_contaminants.fasta	20216.6	0.998	2	2	4	0.0031	0.122
201210Orbi_Dave_Gelsample (1)	Uncategorized Sample	BioSample 1	P58 (F020939)	| Symbols: RBCS1A | ribulose bisphosphate carboxylase small chain 1A | chr1:25048465-25049249 REVERSE LENGTH=180	AT1G67090.1	TAIR10_pep_20101214_contaminants.fasta	20216.6	0.998	2	2	3	0.0022	0.122
201210Orbi_Dave_Gelsample (1)	Uncategorized Sample	BioSample 1	P62 (F020943)	| Symbols: RBCS1A | ribulose bisphosphate carboxylase small chain 1A | chr1:25048465-25049249 REVERSE LENGTH=180	AT1G67090.1	TAIR10_pep_20101214_contaminants.fasta	20216.6	1	4	4	5	0.004	0.261
201210Orbi_Dave_Gelsample (1)	Uncategorized Sample	BioSample 1	P65 (F020946)	| Symbols: RBCS1A | ribulose bisphosphate carboxylase small chain 1A | chr1:25048465-25049249 REVERSE LENGTH=180	AT1G67090.1	TAIR10_pep_20101214_contaminants.fasta	20216.6	0.998	2	2	2	0.0017	0.122
201210Orbi_Dave_Gelsample (1)	Uncategorized Sample	BioSample 1	P72 (F020953)	| Symbols: RBCS1A | ribulose bisphosphate carboxylase small chain 1A | chr1:25048465-25049249 REVERSE LENGTH=180	AT1G67090.1	TAIR10_pep_20101214_contaminants.fasta	20216.6	0.998	2	2	3	0.003	0.178
201210Orbi_Dave_Gelsample (1)	Uncategorized Sample	BioSample 1	P73 (F020954)	| Symbols: RBCS1A | ribulose bisphosphate carboxylase small chain 1A | chr1:25048465-25049249 REVERSE LENGTH=180	AT1G67090.1	TAIR10_pep_20101214_contaminants.fasta	20216.6	1	8	8	13	0.0145	0.467
201210Orbi_Dave_Gelsample (1)	Uncategorized Sample	BioSample 1	P75 (F020956)	| Symbols: RBCS1A | ribulose bisphosphate carboxylase small chain 1A | chr1:25048465-25049249 REVERSE LENGTH=180	AT1G67090.1	TAIR10_pep_20101214_contaminants.fasta	20216.6	1	11	17	35	0.0346	0.478
201211Orbi_Dave_Gelsample2	Uncategorized Sample	BioSample 1	S49 (F021046)	| Symbols: RBCS1A | ribulose bisphosphate carboxylase small chain 1A | chr1:25048465-25049249 REVERSE LENGTH=180	AT1G67090.1	TAIR10_pep_20101214_contaminants.fasta	20216.6	0.999	2	2	2	0.00421	0.3
201210Orbi_Dave_Gelsample (1)	Uncategorized Sample	BioSample 1	P51 (F020932)	| Symbols: | Glyoxalase/Bleomycin resistance protein/Dioxygenase superfamily protein | chr1:25188563-25190547 REVERSE LENGTH=350	AT1G67280.1	TAIR10_pep_20101214_contaminants.fasta	39168.7	1	8	8	14	0.0109	0.254
201211Orbi_Dave_Gelsample2	Uncategorized Sample	BioSample 1	S25 (F021001)	| Symbols: | Glyoxalase/Bleomycin resistance protein/Dioxygenase superfamily protein | chr1:25188563-25190547 REVERSE LENGTH=350	AT1G67280.1,AT1G67280.2	TAIR10_pep_20101214_contaminants.fasta	39168.7	1	3	3	4	0.00265	0.16
201211Orbi_Dave_Gelsample2	Uncategorized Sample	BioSample 1	S10 (F020986)	| Symbols: HPR, ATHPR1 | hydroxypyruvate reductase | chr1:25493418-25495720 FORWARD LENGTH=386	AT1G68010.1	TAIR10_pep_20101214_contaminants.fasta	42248.5	1	17	18	43	0.0326	0.541
201211Orbi_Dave_Gelsample2	Uncategorized Sample	BioSample 1	S31 (F021013)	| Symbols: HPR, ATHPR1 | hydroxypyruvate reductase | chr1:25493418-25495720 FORWARD LENGTH=386	AT1G68010.1	TAIR10_pep_20101214_contaminants.fasta	42248.5	0.999	2	2	3	0.00231	0.0518
201211Orbi_Dave_Gelsample2	Uncategorized Sample	BioSample 1	S33 (F021015)	| Symbols: HPR, ATHPR1 | hydroxypyruvate reductase | chr1:25493418-25495720 FORWARD LENGTH=386	AT1G68010.1	TAIR10_pep_20101214_contaminants.fasta	42248.5	0.999	2	2	3	0.00254	0.0518
201211Orbi_Dave_Gelsample2	Uncategorized Sample	BioSample 1	S37 (F021019)	| Symbols: HPR, ATHPR1 | hydroxypyruvate reductase | chr1:25493418-25495720 FORWARD LENGTH=386	AT1G68010.1	TAIR10_pep_20101214_contaminants.fasta	42248.5	1	3	3	3	0.00235	0.127
201211Orbi_Dave_Gelsample2	Uncategorized Sample	BioSample 1	S52 (F021049)	| Symbols: HPR, ATHPR1 | hydroxypyruvate reductase | chr1:25493418-25495720 FORWARD LENGTH=386	AT1G68010.1	TAIR10_pep_20101214_contaminants.fasta	42248.5	1	12	14	24	0.0149	0.342
201210Orbi_Dave_Gelsample (1)	Uncategorized Sample	BioSample 1	P43 (F020924)	| Symbols: HPR, ATHPR1 | hydroxypyruvate reductase | chr1:25493418-25495720 FORWARD LENGTH=386	AT1G68010.1,AT1G68010.2	TAIR10_pep_20101214_contaminants.fasta	42248.5	1	4	4	4	0.0021	0.114
201210Orbi_Dave_Gelsample (1)	Uncategorized Sample	BioSample 1	P45 (F020926)	| Symbols: HPR, ATHPR1 | hydroxypyruvate reductase | chr1:25493418-25495720 FORWARD LENGTH=386	AT1G68010.1,AT1G68010.2	TAIR10_pep_20101214_contaminants.fasta	42248.5	0.998	2	2	2	0.0015	0.0674
201210Orbi_Dave_Gelsample (1)	Uncategorized Sample	BioSample 1	P53 (F020934)	| Symbols: HPR, ATHPR1 | hydroxypyruvate reductase | chr1:25493418-25495720 FORWARD LENGTH=386	AT1G68010.1,AT1G68010.2	TAIR10_pep_20101214_contaminants.fasta	42248.5	0.998	2	2	2	0.0013	0.0622
201210Orbi_Dave_Gelsample (1)	Uncategorized Sample	BioSample 1	P10 (F020875)	| Symbols: | phosphoglucomutase, putative / glucose phosphomutase, putative | chr1:26705594-26708034 FORWARD LENGTH=615	AT1G70820.1	TAIR10_pep_20101214_contaminants.fasta	67314	0.998	2	2	2	0.0012	0.0585
201211Orbi_Dave_Gelsample2	Uncategorized Sample	BioSample 1	S56 (F021053)	| Symbols: | phosphoglucomutase, putative / glucose phosphomutase, putative | chr1:26705594-26708034 FORWARD LENGTH=615	AT1G70820.1	TAIR10_pep_20101214_contaminants.fasta	67314	1	6	6	12	0.0101	0.0846
201210Orbi_Dave_Gelsample (1)	Uncategorized Sample	BioSample 1	P44 (F020925)	| Symbols: MLP43 | MLP-like protein 43 | chr1:26725912-26726489 REVERSE LENGTH=158	AT1G70890.1	TAIR10_pep_20101214_contaminants.fasta	17889.2	0.998	2	2	64	0.0549	0.682
201210Orbi_Dave_Gelsample (1)	Uncategorized Sample	BioSample 1	P62 (F020943)	| Symbols: MLP43 | MLP-like protein 43 | chr1:26725912-26726489 REVERSE LENGTH=158	AT1G70890.1	TAIR10_pep_20101214_contaminants.fasta	17889.2	0.998	2	2	3	0.0033	0.181
201210Orbi_Dave_Gelsample (1)	Uncategorized Sample	BioSample 1	P68 (F020949)	| Symbols: MLP43 | MLP-like protein 43 | chr1:26725912-26726489 REVERSE LENGTH=158	AT1G70890.1	TAIR10_pep_20101214_contaminants.fasta	17889.2	1	4	4	4	0.0023	0.114
201211Orbi_Dave_Gelsample2	Uncategorized Sample	BioSample 1	S38 (F021020)	| Symbols: MLP43 | MLP-like protein 43 | chr1:26725912-26726489 REVERSE LENGTH=158	AT1G70890.1	TAIR10_pep_20101214_contaminants.fasta	17889.2	1	6	6	6	0.0069	0.253
201211Orbi_Dave_Gelsample2	Uncategorized Sample	BioSample 1	S43 (F021040)	| Symbols: MLP43 | MLP-like protein 43 | chr1:26725912-26726489 REVERSE LENGTH=158	AT1G70890.1	TAIR10_pep_20101214_contaminants.fasta	17889.2	1	6	6	14	0.0121	0.367
201211Orbi_Dave_Gelsample2	Uncategorized Sample	BioSample 1	S44 (F021041)	| Symbols: MLP43 | MLP-like protein 43 | chr1:26725912-26726489 REVERSE LENGTH=158	AT1G70890.1	TAIR10_pep_20101214_contaminants.fasta	17889.2	1	6	6	14	0.0188	0.367
201211Orbi_Dave_Gelsample2	Uncategorized Sample	BioSample 1	S51 (F021048)	| Symbols: MLP43 | MLP-like protein 43 | chr1:26725912-26726489 REVERSE LENGTH=158	AT1G70890.1	TAIR10_pep_20101214_contaminants.fasta	17889.2	1	3	3	4	0.00318	0.165
201210Orbi_Dave_Gelsample (1)	Uncategorized Sample	BioSample 1	P41 (F020922)	| Symbols: P40, AP40, RP40, RPSAA | 40s ribosomal protein SA | chr1:27243148-27244842 REVERSE LENGTH=298	AT1G72370.1,AT1G72370.2	TAIR10_pep_20101214_contaminants.fasta	32291.9	0.998	2	2	3	0.0022	0.101
201210Orbi_Dave_Gelsample (1)	Uncategorized Sample	BioSample 1	P42 (F020923)	| Symbols: P40, AP40, RP40, RPSAA | 40s ribosomal protein SA | chr1:27243148-27244842 REVERSE LENGTH=298	AT1G72370.1,AT1G72370.2	TAIR10_pep_20101214_contaminants.fasta	32291.9	1	6	6	9	0.007	0.211
201210Orbi_Dave_Gelsample (1)	Uncategorized Sample	BioSample 1	P45 (F020926)	| Symbols: P40, AP40, RP40, RPSAA | 40s ribosomal protein SA | chr1:27243148-27244842 REVERSE LENGTH=298	AT1G72370.1,AT1G72370.2	TAIR10_pep_20101214_contaminants.fasta	32291.9	1	6	6	16	0.0117	0.245
201210Orbi_Dave_Gelsample (1)	Uncategorized Sample	BioSample 1	P46 (F020927)	| Symbols: P40, AP40, RP40, RPSAA | 40s ribosomal protein SA | chr1:27243148-27244842 REVERSE LENGTH=298	AT1G72370.1,AT1G72370.2	TAIR10_pep_20101214_contaminants.fasta	32291.9	1	9	10	21	0.0148	0.342
201211Orbi_Dave_Gelsample2	Uncategorized Sample	BioSample 1	S12 (F020988)	| Symbols: P40, AP40, RP40, RPSAA | 40s ribosomal protein SA | chr1:27243148-27244842 REVERSE LENGTH=298	AT1G72370.1,AT1G72370.2	TAIR10_pep_20101214_contaminants.fasta	32291.9	1	4	4	10	0.00693	0.128
201211Orbi_Dave_Gelsample2	Uncategorized Sample	BioSample 1	S05 (F020981)	| Symbols: | ADP-glucose pyrophosphorylase family protein | chr1:28135770-28138456 REVERSE LENGTH=415	AT1G74910.1,AT1G74910.2	TAIR10_pep_20101214_contaminants.fasta	45564.1	1	6	6	8	0.00553	0.173
201210Orbi_Dave_Gelsample (1)	Uncategorized Sample	BioSample 1	P37 (F020918)	| Symbols: | ADP-glucose pyrophosphorylase family protein | chr1:28135770-28138456 REVERSE LENGTH=415	AT1G74910.1,AT1G74910.2,AT1G74910.3	TAIR10_pep_20101214_contaminants.fasta	45564.1	1	3	3	4	0.0029	0.094
201210Orbi_Dave_Gelsample (1)	Uncategorized Sample	BioSample 1	P43 (F020924)	| Symbols: FAB1, KAS2, ATKAS2 | fatty acid biosynthesis 1 | chr1:28152564-28155948 REVERSE LENGTH=541	AT1G74960.1,AT1G74960.2,AT1G74960.3	TAIR10_pep_20101214_contaminants.fasta	57600.4	1	10	11	22	0.0115	0.24
201211Orbi_Dave_Gelsample2	Uncategorized Sample	BioSample 1	S55 (F021052)	| Symbols: FAB1, KAS2, ATKAS2 | fatty acid biosynthesis 1 | chr1:28152564-28155948 REVERSE LENGTH=541	AT1G74960.1,AT1G74960.2,AT1G74960.3	TAIR10_pep_20101214_contaminants.fasta	57600.4	1	8	8	13	0.00875	0.15
201210Orbi_Dave_Gelsample (1)	Uncategorized Sample	BioSample 1	P47 (F020928)	| Symbols: OTC | ornithine carbamoyltransferase | chr1:28266457-28268383 REVERSE LENGTH=375	AT1G75330.1	TAIR10_pep_20101214_contaminants.fasta	41002.4	1	6	8	14	0.0093	0.171
201211Orbi_Dave_Gelsample2	Uncategorized Sample	BioSample 1	S16 (F020992)	| Symbols: OTC | ornithine carbamoyltransferase | chr1:28266457-28268383 REVERSE LENGTH=375	AT1G75330.1	TAIR10_pep_20101214_contaminants.fasta	41002.4	1	4	4	6	0.00431	0.125
201211Orbi_Dave_Gelsample2	Uncategorized Sample	BioSample 1	S17 (F020993)	| Symbols: OTC | ornithine carbamoyltransferase | chr1:28266457-28268383 REVERSE LENGTH=375	AT1G75330.1	TAIR10_pep_20101214_contaminants.fasta	41002.4	1	10	14	48	0.0338	0.253
201210Orbi_Dave_Gelsample (1)	Uncategorized Sample	BioSample 1	P57 (F020938)	| Symbols: ATCDSP32, CDSP32 | chloroplastic drought-induced stress protein of 32 kD | chr1:28548063-28549348 REVERSE LENGTH=302	AT1G76080.1	TAIR10_pep_20101214_contaminants.fasta	33685	1	4	4	5	0.0032	0.132
201211Orbi_Dave_Gelsample2	Uncategorized Sample	BioSample 1	S24 (F021000)	| Symbols: ATCDSP32, CDSP32 | chloroplastic drought-induced stress protein of 32 kD | chr1:28548063-28549348 REVERSE LENGTH=302	AT1G76080.1	TAIR10_pep_20101214_contaminants.fasta	33685	1	3	3	5	0.00347	0.0927
201210Orbi_Dave_Gelsample (1)	Uncategorized Sample	BioSample 1	P22 (F020887)	| Symbols: | Prolyl oligopeptidase family protein | chr1:28571187-28574852 FORWARD LENGTH=795	AT1G76140.1,AT1G76140.2	TAIR10_pep_20101214_contaminants.fasta	89406.9	1	3	3	5	0.0044	0.0553
201211Orbi_Dave_Gelsample2	Uncategorized Sample	BioSample 1	S03 (F020979)	| Symbols: | Prolyl oligopeptidase family protein | chr1:28571187-28574852 FORWARD LENGTH=795	AT1G76140.1,AT1G76140.2	TAIR10_pep_20101214_contaminants.fasta	89406.9	1	6	6	2	0.0026	0.0177
201210Orbi_Dave_Gelsample (1)	Uncategorized Sample	BioSample 1	P62 (F020943)	| Symbols: | Mog1/PsbP/DUF1795-like photosystem II reaction center PsbP family protein | chr1:28960576-28961875 REVERSE LENGTH=260	AT1G77090.1	TAIR10_pep_20101214_contaminants.fasta	28501.5	1	3	3	8	0.00678	0.223
201211Orbi_Dave_Gelsample2	Uncategorized Sample	BioSample 1	S33 (F021015)	| Symbols: | Mog1/PsbP/DUF1795-like photosystem II reaction center PsbP family protein | chr1:28960576-28961875 REVERSE LENGTH=260	AT1G77090.1	TAIR10_pep_20101214_contaminants.fasta	28501.5	1	5	5	5	0.0033	0.153
201211Orbi_Dave_Gelsample2	Uncategorized Sample	BioSample 1	S34 (F021016)	| Symbols: | Mog1/PsbP/DUF1795-like photosystem II reaction center PsbP family protein | chr1:28960576-28961875 REVERSE LENGTH=260	AT1G77090.1	TAIR10_pep_20101214_contaminants.fasta	28501.5	1	9	10	13	0.0102	0.298
201211Orbi_Dave_Gelsample2	Uncategorized Sample	BioSample 1	S35 (F021017)	| Symbols: | Mog1/PsbP/DUF1795-like photosystem II reaction center PsbP family protein | chr1:28960576-28961875 REVERSE LENGTH=260	AT1G77090.1	TAIR10_pep_20101214_contaminants.fasta	28501.5	1	7	8	4	0.0032	0.231
201211Orbi_Dave_Gelsample2	Uncategorized Sample	BioSample 1	S37 (F021019)	| Symbols: | Mog1/PsbP/DUF1795-like photosystem II reaction center PsbP family protein | chr1:28960576-28961875 REVERSE LENGTH=260	AT1G77090.1	TAIR10_pep_20101214_contaminants.fasta	28501.5	1	8	8	4	0.0034	0.357
201210Orbi_Dave_Gelsample (1)	Uncategorized Sample	BioSample 1	P47 (F020928)	| Symbols: | D-mannose binding lectin protein with Apple-like carbohydrate-binding domain | chr1:29634401-29635768 REVERSE LENGTH=455	AT1G78820.1	TAIR10_pep_20101214_contaminants.fasta	50595.6	0.998	2	2	2	0.0013	0.0835
201211Orbi_Dave_Gelsample2	Uncategorized Sample	BioSample 1	S57 (F021054)	| Symbols: | D-mannose binding lectin protein with Apple-like carbohydrate-binding domain | chr1:29642072-29643397 REVERSE LENGTH=441	AT1G78850.1	TAIR10_pep_20101214_contaminants.fasta	49052.5	1	3	3	5	0.00319	0.0703
201210Orbi_Dave_Gelsample (1)	Uncategorized Sample	BioSample 1	P37 (F020918)	| Symbols: | D-mannose binding lectin protein with Apple-like carbohydrate-binding domain | chr1:29642072-29643397 REVERSE LENGTH=441	AT1G78850.1,AT1G78860.1	TAIR10_pep_20101214_contaminants.fasta	49195.3	1	3	4	5	0.0036	0.0903
201210Orbi_Dave_Gelsample (1)	Uncategorized Sample	BioSample 1	P02 (F020884)	| Symbols: VHA-A | vacuolar ATP synthase subunit A | chr1:29660463-29664575 FORWARD LENGTH=623	AT1G78900.1,AT1G78900.2	TAIR10_pep_20101214_contaminants.fasta	68814.5	1	9	10	18	0.0108	0.205
201210Orbi_Dave_Gelsample (1)	Uncategorized Sample	BioSample 1	P07 (F020906)	| Symbols: VHA-A | vacuolar ATP synthase subunit A | chr1:29660463-29664575 FORWARD LENGTH=623	AT1G78900.1,AT1G78900.2	TAIR10_pep_20101214_contaminants.fasta	68814.5	1	30	38	64	0.0448	0.637
201210Orbi_Dave_Gelsample (1)	Uncategorized Sample	BioSample 1	P08 (F020969)	| Symbols: VHA-A | vacuolar ATP synthase subunit A | chr1:29660463-29664575 FORWARD LENGTH=623	AT1G78900.1,AT1G78900.2	TAIR10_pep_20101214_contaminants.fasta	68814.5	1	16	17	31	0.0413	0.321
201210Orbi_Dave_Gelsample (1)	Uncategorized Sample	BioSample 1	P14 (F020965)	| Symbols: VHA-A | vacuolar ATP synthase subunit A | chr1:29660463-29664575 FORWARD LENGTH=623	AT1G78900.1,AT1G78900.2	TAIR10_pep_20101214_contaminants.fasta	68814.5	1	12	14	23	0.0323	0.257
201210Orbi_Dave_Gelsample (1)	Uncategorized Sample	BioSample 1	P30 (F020966)	| Symbols: VHA-A | vacuolar ATP synthase subunit A | chr1:29660463-29664575 FORWARD LENGTH=623	AT1G78900.1,AT1G78900.2	TAIR10_pep_20101214_contaminants.fasta	68814.5	1	15	16	25	0.0347	0.323
201210Orbi_Dave_Gelsample (1)	Uncategorized Sample	BioSample 1	P31 (F020913)	| Symbols: VHA-A | vacuolar ATP synthase subunit A | chr1:29660463-29664575 FORWARD LENGTH=623	AT1G78900.1,AT1G78900.2	TAIR10_pep_20101214_contaminants.fasta	68814.5	1	20	22	45	0.0305	0.411
201211Orbi_Dave_Gelsample2	Uncategorized Sample	BioSample 1	S03 (F020979)	| Symbols: VHA-A | vacuolar ATP synthase subunit A | chr1:29660463-29664575 FORWARD LENGTH=623	AT1G78900.1,AT1G78900.2	TAIR10_pep_20101214_contaminants.fasta	68814.5	1	3	3	5	0.00356	0.0658
201210Orbi_Dave_Gelsample (1)	Uncategorized Sample	BioSample 1	P14 (F020965)	| Symbols: ST1, ATMST1, MST1, ATRDH1, STR1 | mercaptopyruvate sulfurtransferase 1 | chr1:29800824-29803679 FORWARD LENGTH=379	AT1G79230.1,AT1G79230.3	TAIR10_pep_20101214_contaminants.fasta	41894.3	1	5	5	6	0.0084	0.177
201211Orbi_Dave_Gelsample2	Uncategorized Sample	BioSample 1	S51 (F021048)	| Symbols: ST1, ATMST1, MST1, ATRDH1, STR1 | mercaptopyruvate sulfurtransferase 1 | chr1:29800824-29803679 FORWARD LENGTH=379	AT1G79230.1,AT1G79230.3	TAIR10_pep_20101214_contaminants.fasta	41894.3	1	12	17	46	0.0366	0.425
201210Orbi_Dave_Gelsample (1)	Uncategorized Sample	BioSample 1	P45 (F020926)	| Symbols: PGK | phosphoglycerate kinase | chr1:29924347-29926295 REVERSE LENGTH=401	AT1G79550.1,AT1G79550.2	TAIR10_pep_20101214_contaminants.fasta	42132.9	1	6	7	46	0.024	0.574
201211Orbi_Dave_Gelsample2	Uncategorized Sample	BioSample 1	S11 (F020987)	| Symbols: PGK | phosphoglycerate kinase | chr1:29924347-29926295 REVERSE LENGTH=401	AT1G79550.1,AT1G79550.2	TAIR10_pep_20101214_contaminants.fasta	42132.9	1	16	23	9	0.0066	0.133
201210Orbi_Dave_Gelsample (1)	Uncategorized Sample	BioSample 1	P42 (F020923)	| Symbols: ATIMD2, IMD2 | isopropylmalate dehydrogenase 2 | chr1:30287833-30290126 FORWARD LENGTH=405	AT1G80560.1	TAIR10_pep_20101214_contaminants.fasta	43371.6	1	11	13	3	0.0016	0.286
201210Orbi_Dave_Gelsample (1)	Uncategorized Sample	BioSample 1	P43 (F020924)	| Symbols: ATIMD2, IMD2 | isopropylmalate dehydrogenase 2 | chr1:30287833-30290126 FORWARD LENGTH=405	AT1G80560.1	TAIR10_pep_20101214_contaminants.fasta	43371.6	1	19	25	45	0.0235	0.602
201210Orbi_Dave_Gelsample (1)	Uncategorized Sample	BioSample 1	P44 (F020925)	| Symbols: ATIMD2, IMD2 | isopropylmalate dehydrogenase 2 | chr1:30287833-30290126 FORWARD LENGTH=405	AT1G80560.1	TAIR10_pep_20101214_contaminants.fasta	43371.6	1	22	32	18	0.014	0.369
201211Orbi_Dave_Gelsample2	Uncategorized Sample	BioSample 1	S50 (F021047)	| Symbols: ATIMD2, IMD2 | isopropylmalate dehydrogenase 2 | chr1:30287833-30290126 FORWARD LENGTH=405	AT1G80560.1	TAIR10_pep_20101214_contaminants.fasta	43371.6	1	4	5	49	0.0277	0.562
201210Orbi_Dave_Gelsample (1)	Uncategorized Sample	BioSample 1	P47 (F020928)	| Symbols: | Aldolase superfamily protein | chr2:95006-96491 REVERSE LENGTH=391	AT2G01140.1	TAIR10_pep_20101214_contaminants.fasta	42328.1	1	22	28	54	0.036	0.527
201210Orbi_Dave_Gelsample (1)	Uncategorized Sample	BioSample 1	P48 (F020929)	| Symbols: | Aldolase superfamily protein | chr2:95006-96491 REVERSE LENGTH=391	AT2G01140.1	TAIR10_pep_20101214_contaminants.fasta	42328.1	1	3	3	5	0.0037	0.115
201211Orbi_Dave_Gelsample2	Uncategorized Sample	BioSample 1	S05 (F020981)	| Symbols: | Aldolase superfamily protein | chr2:95006-96491 REVERSE LENGTH=391	AT2G01140.1	TAIR10_pep_20101214_contaminants.fasta	42328.1	1	2	2	3	0.00207	0.0691
201211Orbi_Dave_Gelsample2	Uncategorized Sample	BioSample 1	S17 (F020993)	| Symbols: | Aldolase superfamily protein | chr2:95006-96491 REVERSE LENGTH=391	AT2G01140.1	TAIR10_pep_20101214_contaminants.fasta	42328.1	0.999	2	2	2	0.00141	0.0691
201211Orbi_Dave_Gelsample2	Uncategorized Sample	BioSample 1	S52 (F021049)	| Symbols: | Aldolase superfamily protein | chr2:95006-96491 REVERSE LENGTH=391	AT2G01140.1	TAIR10_pep_20101214_contaminants.fasta	42328.1	1	3	3	3	0.00187	0.0767
201210Orbi_Dave_Gelsample (1)	Uncategorized Sample	BioSample 1	P48 (F020929)	| Symbols: MOD1, ENR1 | NAD(P)-binding Rossmann-fold superfamily protein | chr2:2322876-2324867 FORWARD LENGTH=390	AT2G05990.1,AT2G05990.2	TAIR10_pep_20101214_contaminants.fasta	41215.8	1	4	4	10	0.0116	0.0805
201210Orbi_Dave_Gelsample (1)	Uncategorized Sample	BioSample 1	P49 (F020930)	| Symbols: MOD1, ENR1 | NAD(P)-binding Rossmann-fold superfamily protein | chr2:2322876-2324867 FORWARD LENGTH=390	AT2G05990.1,AT2G05990.2	TAIR10_pep_20101214_contaminants.fasta	41215.8	1	5	6	3	0.0018	0.104
201211Orbi_Dave_Gelsample2	Uncategorized Sample	BioSample 1	S16 (F020992)	| Symbols: MOD1, ENR1 | NAD(P)-binding Rossmann-fold superfamily protein | chr2:2322876-2324867 FORWARD LENGTH=390	AT2G05990.1,AT2G05990.2	TAIR10_pep_20101214_contaminants.fasta	41215.8	1	10	11	10	0.00704	0.224
201211Orbi_Dave_Gelsample2	Uncategorized Sample	BioSample 1	S17 (F020993)	| Symbols: MOD1, ENR1 | NAD(P)-binding Rossmann-fold superfamily protein | chr2:2322876-2324867 FORWARD LENGTH=390	AT2G05990.1,AT2G05990.2	TAIR10_pep_20101214_contaminants.fasta	41215.8	1	6	6	5	0.00352	0.109
201210Orbi_Dave_Gelsample (1)	Uncategorized Sample	BioSample 1	P11 (F020876)	| Symbols: | ATPase, F1 complex, alpha subunit protein | chr2:3361474-3364028 FORWARD LENGTH=777	AT2G07698.1	TAIR10_pep_20101214_contaminants.fasta	85935.7	1	3	3	4	0.0026	0.0952
201210Orbi_Dave_Gelsample (1)	Uncategorized Sample	BioSample 1	P32 (F020914)	| Symbols: | ATPase, F1 complex, alpha subunit protein | chr2:3361474-3364028 FORWARD LENGTH=777	AT2G07698.1	TAIR10_pep_20101214_contaminants.fasta	85935.7	1	5	5	6	0.0044	0.0837
201210Orbi_Dave_Gelsample (1)	Uncategorized Sample	BioSample 1	P34 (F020916)	| Symbols: | ATPase, F1 complex, alpha subunit protein | chr2:3361474-3364028 FORWARD LENGTH=777	AT2G07698.1	TAIR10_pep_20101214_contaminants.fasta	85935.7	1	3	4	6	0.005	0.0502
201210Orbi_Dave_Gelsample (1)	Uncategorized Sample	BioSample 1	P36 (F020967)	| Symbols: | ATPase, F1 complex, alpha subunit protein | chr2:3361474-3364028 FORWARD LENGTH=777	AT2G07698.1	TAIR10_pep_20101214_contaminants.fasta	85935.7	0.998	2	2	4	0.0064	0.0296
201210Orbi_Dave_Gelsample (1)	Uncategorized Sample	BioSample 1	P37 (F020918)	| Symbols: | ATPase, F1 complex, alpha subunit protein | chr2:3361474-3364028 FORWARD LENGTH=777	AT2G07698.1	TAIR10_pep_20101214_contaminants.fasta	85935.7	1	12	14	27	0.0197	0.218
201211Orbi_Dave_Gelsample2	Uncategorized Sample	BioSample 1	S09 (F020985)	| Symbols: | ATPase, F1 complex, alpha subunit protein | chr2:3361474-3364028 FORWARD LENGTH=777	AT2G07698.1	TAIR10_pep_20101214_contaminants.fasta	85935.7	1	6	6	8	0.00529	0.0849
201211Orbi_Dave_Gelsample2	Uncategorized Sample	BioSample 1	S38 (F021020)	| Symbols: | ATPase, F1 complex, alpha subunit protein | chr2:3361474-3364028 FORWARD LENGTH=777	AT2G07698.1	TAIR10_pep_20101214_contaminants.fasta	85935.7	1	8	8	16	0.0138	0.102
201211Orbi_Dave_Gelsample2	Uncategorized Sample	BioSample 1	S57 (F021054)	| Symbols: | ATPase, F1 complex, alpha subunit protein | chr2:3361474-3364028 FORWARD LENGTH=777	AT2G07698.1	TAIR10_pep_20101214_contaminants.fasta	85935.7	1	21	25	41	0.0262	0.254
201210Orbi_Dave_Gelsample (1)	Uncategorized Sample	BioSample 1	P33 (F020915)	| Symbols: NIR1, NIR, ATHNIR | nitrite reductase 1 | chr2:6810552-6812666 FORWARD LENGTH=586	AT2G15620.1	TAIR10_pep_20101214_contaminants.fasta	65505.8	1	40	59	149	0.105	0.642
201211Orbi_Dave_Gelsample2	Uncategorized Sample	BioSample 1	S56 (F021053)	| Symbols: NIR1, NIR, ATHNIR | nitrite reductase 1 | chr2:6810552-6812666 FORWARD LENGTH=586	AT2G15620.1	TAIR10_pep_20101214_contaminants.fasta	65505.8	1	16	17	28	0.0235	0.302
201210Orbi_Dave_Gelsample (1)	Uncategorized Sample	BioSample 1	P47 (F020928)	| Symbols: HSK, DMR1 | homoserine kinase | chr2:7508606-7509718 FORWARD LENGTH=370	AT2G17265.1	TAIR10_pep_20101214_contaminants.fasta	38528.9	0.998	2	3	3	0.002	0.0568
201211Orbi_Dave_Gelsample2	Uncategorized Sample	BioSample 1	S17 (F020993)	| Symbols: HSK, DMR1 | homoserine kinase | chr2:7508606-7509718 FORWARD LENGTH=370	AT2G17265.1	TAIR10_pep_20101214_contaminants.fasta	38528.9	1	5	5	8	0.00563	0.222
201210Orbi_Dave_Gelsample (1)	Uncategorized Sample	BioSample 1	P47 (F020928)	| Symbols: NTRA, ATNTRA, NTR2 | NADPH-dependent thioredoxin reductase A | chr2:7564357-7566219 FORWARD LENGTH=378	AT2G17420.1	TAIR10_pep_20101214_contaminants.fasta	40015	1	7	7	5	0.003	0.122
201210Orbi_Dave_Gelsample (1)	Uncategorized Sample	BioSample 1	P49 (F020930)	| Symbols: NTRA, ATNTRA, NTR2 | NADPH-dependent thioredoxin reductase A | chr2:7564357-7566219 FORWARD LENGTH=378	AT2G17420.1	TAIR10_pep_20101214_contaminants.fasta	40015	1	3	3	4	0.0026	0.111
201210Orbi_Dave_Gelsample (1)	Uncategorized Sample	BioSample 1	P50 (F020931)	| Symbols: NTRA, ATNTRA, NTR2 | NADPH-dependent thioredoxin reductase A | chr2:7564357-7566219 FORWARD LENGTH=378	AT2G17420.1	TAIR10_pep_20101214_contaminants.fasta	40015	1	3	3	5	0.0074	0.0741
201210Orbi_Dave_Gelsample (1)	Uncategorized Sample	BioSample 1	P77 (F020958)	| Symbols: NTRA, ATNTRA, NTR2 | NADPH-dependent thioredoxin reductase A | chr2:7564357-7566219 FORWARD LENGTH=378	AT2G17420.1	TAIR10_pep_20101214_contaminants.fasta	40015	0.998	2	3	4	0.00303	0.122
201211Orbi_Dave_Gelsample2	Uncategorized Sample	BioSample 1	S20 (F020996)	| Symbols: NTRA, ATNTRA, NTR2 | NADPH-dependent thioredoxin reductase A | chr2:7564357-7566219 FORWARD LENGTH=378	AT2G17420.1	TAIR10_pep_20101214_contaminants.fasta	40015	1	3	3	3	0.0018	0.0718
201210Orbi_Dave_Gelsample (1)	Uncategorized Sample	BioSample 1	P10 (F020875)	| Symbols: | lumazine-binding family protein | chr2:8923342-8924621 FORWARD LENGTH=271	AT2G20690.1	TAIR10_pep_20101214_contaminants.fasta	29638.8	1	3	3	4	0.0024	0.114
201210Orbi_Dave_Gelsample (1)	Uncategorized Sample	BioSample 1	P16 (F020880)	| Symbols: | lumazine-binding family protein | chr2:8923342-8924621 FORWARD LENGTH=271	AT2G20690.1	TAIR10_pep_20101214_contaminants.fasta	29638.8	1	9	12	37	0.0352	0.232
201210Orbi_Dave_Gelsample (1)	Uncategorized Sample	BioSample 1	P22 (F020887)	| Symbols: | lumazine-binding family protein | chr2:8923342-8924621 FORWARD LENGTH=271	AT2G20690.1	TAIR10_pep_20101214_contaminants.fasta	29638.8	1	10	12	29	0.0257	0.232
201211Orbi_Dave_Gelsample2	Uncategorized Sample	BioSample 1	S29 (F021005)	| Symbols: | lumazine-binding family protein | chr2:8923342-8924621 FORWARD LENGTH=271	AT2G20690.1	TAIR10_pep_20101214_contaminants.fasta	29638.8	1	5	5	8	0.00753	0.155
201211Orbi_Dave_Gelsample2	Uncategorized Sample	BioSample 1	S27 (F021003)	| Symbols: TIM, PDTPI | triosephosphate isomerase | chr2:9071047-9073106 REVERSE LENGTH=315	AT2G21170.1	TAIR10_pep_20101214_contaminants.fasta	33345.4	1	10	13	25	0.0199	0.375
201210Orbi_Dave_Gelsample (1)	Uncategorized Sample	BioSample 1	P15 (F020879)	| Symbols: TIM, PDTPI | triosephosphate isomerase | chr2:9071047-9073106 REVERSE LENGTH=315	AT2G21170.1,AT2G21170.2	TAIR10_pep_20101214_contaminants.fasta	33345.4	1	6	6	6	0.0044	0.235
201210Orbi_Dave_Gelsample (1)	Uncategorized Sample	BioSample 1	P49 (F020930)	| Symbols: | NAD(P)-linked oxidoreductase superfamily protein | chr2:9103408-9105116 REVERSE LENGTH=309	AT2G21250.1	TAIR10_pep_20101214_contaminants.fasta	35011	1	8	9	20	0.0141	0.284
201211Orbi_Dave_Gelsample2	Uncategorized Sample	BioSample 1	S16 (F020992)	| Symbols: | NAD(P)-linked oxidoreductase superfamily protein | chr2:9103408-9105116 REVERSE LENGTH=309	AT2G21250.1	TAIR10_pep_20101214_contaminants.fasta	35011	1	22	26	11	0.00775	0.244
201211Orbi_Dave_Gelsample2	Uncategorized Sample	BioSample 1	S17 (F020993)	| Symbols: | NAD(P)-linked oxidoreductase superfamily protein | chr2:9103408-9105116 REVERSE LENGTH=309	AT2G21250.1	TAIR10_pep_20101214_contaminants.fasta	35011	1	10	10	14	0.00986	0.311
201210Orbi_Dave_Gelsample (1)	Uncategorized Sample	BioSample 1	P46 (F020927)	| Symbols: FBA1 | fructose-bisphosphate aldolase 1 | chr2:9128416-9130152 REVERSE LENGTH=399	AT2G21330.1	TAIR10_pep_20101214_contaminants.fasta	42931.5	1	3	3	3	0.0021	0.0952
201210Orbi_Dave_Gelsample (1)	Uncategorized Sample	BioSample 1	P48 (F020929)	| Symbols: FBA1 | fructose-bisphosphate aldolase 1 | chr2:9128416-9130152 REVERSE LENGTH=399	AT2G21330.1	TAIR10_pep_20101214_contaminants.fasta	42931.5	1	17	23	4	0.0031	0.0627
201210Orbi_Dave_Gelsample (1)	Uncategorized Sample	BioSample 1	P51 (F020932)	| Symbols: FBA1 | fructose-bisphosphate aldolase 1 | chr2:9128416-9130152 REVERSE LENGTH=399	AT2G21330.1	TAIR10_pep_20101214_contaminants.fasta	42931.5	0.998	2	2	25	0.0187	0.58
201211Orbi_Dave_Gelsample2	Uncategorized Sample	BioSample 1	S14 (F020990)	| Symbols: FBA1 | fructose-bisphosphate aldolase 1 | chr2:9128416-9130152 REVERSE LENGTH=399	AT2G21330.1	TAIR10_pep_20101214_contaminants.fasta	42931.5	1	8	12	9	0.00581	0.143
201210Orbi_Dave_Gelsample (1)	Uncategorized Sample	BioSample 1	P69 (F020950)	| Symbols: ATGRP7, CCR2, GR-RBP7, GRP7 | cold, circadian rhythm, and rna binding 2 | chr2:9265477-9266316 REVERSE LENGTH=176	AT2G21660.1	TAIR10_pep_20101214_contaminants.fasta	16890.1	1	18	22	63	0.0767	0.841
201211Orbi_Dave_Gelsample2	Uncategorized Sample	BioSample 1	S59 (F021056)	| Symbols: ATGRP7, CCR2, GR-RBP7, GRP7 | cold, circadian rhythm, and rna binding 2 | chr2:9265477-9266316 REVERSE LENGTH=176	AT2G21660.1	TAIR10_pep_20101214_contaminants.fasta	16890.1	1	13	14	31	0.041	0.83
201210Orbi_Dave_Gelsample (1)	Uncategorized Sample	BioSample 1	P47 (F020928)	| Symbols: | NAD(P)-linked oxidoreductase superfamily protein | chr2:11803981-11805965 REVERSE LENGTH=384	AT2G27680.1	TAIR10_pep_20101214_contaminants.fasta	43155.4	1	7	9	14	0.00942	0.289
201211Orbi_Dave_Gelsample2	Uncategorized Sample	BioSample 1	S17 (F020993)	| Symbols: | NAD(P)-linked oxidoreductase superfamily protein | chr2:11803981-11805965 REVERSE LENGTH=384	AT2G27680.1	TAIR10_pep_20101214_contaminants.fasta	43155.4	1	9	10	44	0.031	0.471
201210Orbi_Dave_Gelsample (1)	Uncategorized Sample	BioSample 1	P03 (F020895)	| Symbols: CPN60A, CH-CPN60A, SLP | chaperonin-60alpha | chr2:11926603-11929184 FORWARD LENGTH=586	AT2G28000.1	TAIR10_pep_20101214_contaminants.fasta	62073.4	1	49	72	249	0.185	0.807
201210Orbi_Dave_Gelsample (1)	Uncategorized Sample	BioSample 1	P04 (F020968)	| Symbols: CPN60A, CH-CPN60A, SLP | chaperonin-60alpha | chr2:11926603-11929184 FORWARD LENGTH=586	AT2G28000.1	TAIR10_pep_20101214_contaminants.fasta	62073.4	1	6	7	9	0.0228	0.14
201210Orbi_Dave_Gelsample (1)	Uncategorized Sample	BioSample 1	P05 (F020904)	| Symbols: CPN60A, CH-CPN60A, SLP | chaperonin-60alpha | chr2:11926603-11929184 FORWARD LENGTH=586	AT2G28000.1	TAIR10_pep_20101214_contaminants.fasta	62073.4	0.998	2	4	7	0.0055	0.0887
201210Orbi_Dave_Gelsample (1)	Uncategorized Sample	BioSample 1	P09 (F020907)	| Symbols: CPN60A, CH-CPN60A, SLP | chaperonin-60alpha | chr2:11926603-11929184 FORWARD LENGTH=586	AT2G28000.1	TAIR10_pep_20101214_contaminants.fasta	62073.4	1	9	11	19	0.0221	0.244
201210Orbi_Dave_Gelsample (1)	Uncategorized Sample	BioSample 1	P35 (F020917)	| Symbols: CPN60A, CH-CPN60A, SLP | chaperonin-60alpha | chr2:11926603-11929184 FORWARD LENGTH=586	AT2G28000.1	TAIR10_pep_20101214_contaminants.fasta	62073.4	1	30	41	91	0.0863	0.664
201211Orbi_Dave_Gelsample2	Uncategorized Sample	BioSample 1	S56 (F021053)	| Symbols: CPN60A, CH-CPN60A, SLP | chaperonin-60alpha | chr2:11926603-11929184 FORWARD LENGTH=586	AT2G28000.1	TAIR10_pep_20101214_contaminants.fasta	62073.4	1	25	28	51	0.0427	0.466
201210Orbi_Dave_Gelsample (1)	Uncategorized Sample	BioSample 1	P58 (F020939)	| Symbols: ATGSTU7, GST25, GSTU7 | glutathione S-transferase tau 7 | chr2:12618111-12618871 REVERSE LENGTH=227	AT2G29420.1	TAIR10_pep_20101214_contaminants.fasta	26113.2	1	8	10	14	0.0175	0.476
201211Orbi_Dave_Gelsample2	Uncategorized Sample	BioSample 1	S28 (F021004)	| Symbols: ATGSTU7, GST25, GSTU7 | glutathione S-transferase tau 7 | chr2:12618111-12618871 REVERSE LENGTH=227	AT2G29420.1	TAIR10_pep_20101214_contaminants.fasta	26113.2	1	6	9	18	0.0125	0.198
201210Orbi_Dave_Gelsample (1)	Uncategorized Sample	BioSample 1	P53 (F020934)	| Symbols: | catalytics;transferases;[acyl-carrier-protein] S-malonyltransferases;binding | chr2:12883162-12885482 REVERSE LENGTH=393	AT2G30200.1	TAIR10_pep_20101214_contaminants.fasta	41523.7	1	20	32	66	0.043	0.529
201210Orbi_Dave_Gelsample (1)	Uncategorized Sample	BioSample 1	P54 (F020935)	| Symbols: | catalytics;transferases;[acyl-carrier-protein] S-malonyltransferases;binding | chr2:12883162-12885482 REVERSE LENGTH=393	AT2G30200.1	TAIR10_pep_20101214_contaminants.fasta	41523.7	0.998	2	2	2	0.0016	0.0789
201211Orbi_Dave_Gelsample2	Uncategorized Sample	BioSample 1	S21 (F020997)	| Symbols: | catalytics;transferases;[acyl-carrier-protein] S-malonyltransferases;binding | chr2:12883162-12885482 REVERSE LENGTH=393	AT2G30200.1	TAIR10_pep_20101214_contaminants.fasta	41523.7	1	14	14	28	0.0214	0.361
201211Orbi_Dave_Gelsample2	Uncategorized Sample	BioSample 1	S16 (F020992)	| Symbols: ATGSTF9, GLUTTR, ATGSTF7, GSTF9 | glutathione S-transferase PHI 9 | chr2:13139132-13140057 FORWARD LENGTH=215	AT2G30860.1	TAIR10_pep_20101214_contaminants.fasta	24146.4	1	4	4	8	0.0086	0.478
201211Orbi_Dave_Gelsample2	Uncategorized Sample	BioSample 1	S28 (F021004)	| Symbols: ATGSTF9, GLUTTR, ATGSTF7, GSTF9 | glutathione S-transferase PHI 9 | chr2:13139132-13140057 FORWARD LENGTH=215	AT2G30860.1	TAIR10_pep_20101214_contaminants.fasta	24146.4	1	3	3	7	0.00763	0.213
201211Orbi_Dave_Gelsample2	Uncategorized Sample	BioSample 1	S33 (F021015)	| Symbols: ATGSTF9, GLUTTR, ATGSTF7, GSTF9 | glutathione S-transferase PHI 9 | chr2:13139132-13140057 FORWARD LENGTH=215	AT2G30860.1	TAIR10_pep_20101214_contaminants.fasta	24146.4	1	2	2	3	0.00234	0.142
201210Orbi_Dave_Gelsample (1)	Uncategorized Sample	BioSample 1	P58 (F020939)	| Symbols: ATGSTF9, GLUTTR, ATGSTF7, GSTF9 | glutathione S-transferase PHI 9 | chr2:13139132-13140057 FORWARD LENGTH=215	AT2G30860.1,AT2G30860.2	TAIR10_pep_20101214_contaminants.fasta	24146.4	0.998	2	2	3	0.0115	0.374
201210Orbi_Dave_Gelsample (1)	Uncategorized Sample	BioSample 1	P59 (F020940)	| Symbols: ATGSTF9, GLUTTR, ATGSTF7, GSTF9 | glutathione S-transferase PHI 9 | chr2:13139132-13140057 FORWARD LENGTH=215	AT2G30860.1,AT2G30860.2	TAIR10_pep_20101214_contaminants.fasta	24146.4	1	4	4	6	0.0076	0.212
201210Orbi_Dave_Gelsample (1)	Uncategorized Sample	BioSample 1	P60 (F020941)	| Symbols: ATGSTF9, GLUTTR, ATGSTF7, GSTF9 | glutathione S-transferase PHI 9 | chr2:13139132-13140057 FORWARD LENGTH=215	AT2G30860.1,AT2G30860.2	TAIR10_pep_20101214_contaminants.fasta	24146.4	1	6	7	11	0.00932	0.41
201210Orbi_Dave_Gelsample (1)	Uncategorized Sample	BioSample 1	P34 (F020916)	| Symbols: SYCO ARATH | Cysteinyl-tRNA synthetase, class Ia family protein | chr2:13282559-13285616 REVERSE LENGTH=563	AT2G31170.1	TAIR10_pep_20101214_contaminants.fasta	63916.3	1	6	6	8	0.0066	0.155
201211Orbi_Dave_Gelsample2	Uncategorized Sample	BioSample 1	S09 (F020985)	| Symbols: SYCO ARATH | Cysteinyl-tRNA synthetase, class Ia family protein | chr2:13282559-13285616 REVERSE LENGTH=563	AT2G31170.1	TAIR10_pep_20101214_contaminants.fasta	63916.3	1	8	10	17	0.0113	0.149
201210Orbi_Dave_Gelsample (1)	Uncategorized Sample	BioSample 1	P16 (F020880)	| Symbols: | Stress responsive alpha-beta barrel domain protein | chr2:13472699-13473490 REVERSE LENGTH=263	AT2G31670.1	TAIR10_pep_20101214_contaminants.fasta	28865.9	1	6	7	12	0.0114	0.274
201210Orbi_Dave_Gelsample (1)	Uncategorized Sample	BioSample 1	P22 (F020887)	| Symbols: | Stress responsive alpha-beta barrel domain protein | chr2:13472699-13473490 REVERSE LENGTH=263	AT2G31670.1	TAIR10_pep_20101214_contaminants.fasta	28865.9	1	4	5	8	0.0071	0.205
201211Orbi_Dave_Gelsample2	Uncategorized Sample	BioSample 1	S29 (F021005)	| Symbols: | Stress responsive alpha-beta barrel domain protein | chr2:13472699-13473490 REVERSE LENGTH=263	AT2G31670.1	TAIR10_pep_20101214_contaminants.fasta	28865.9	1	7	7	13	0.0122	0.338
201210Orbi_Dave_Gelsample (1)	Uncategorized Sample	BioSample 1	P15 (F020879)	| Symbols: | alpha/beta-Hydrolases superfamily protein | chr2:13805823-13807442 REVERSE LENGTH=239	AT2G32520.1	TAIR10_pep_20101214_contaminants.fasta	25921.6	1	7	7	10	0.0074	0.414
201211Orbi_Dave_Gelsample2	Uncategorized Sample	BioSample 1	S27 (F021003)	| Symbols: | alpha/beta-Hydrolases superfamily protein | chr2:13805823-13807442 REVERSE LENGTH=239	AT2G32520.1	TAIR10_pep_20101214_contaminants.fasta	25921.6	1	6	6	10	0.00796	0.268
201210Orbi_Dave_Gelsample (1)	Uncategorized Sample	BioSample 1	P15 (F020879)	| Symbols: LHB1B2, LHCB1.5 | photosystem II light harvesting complex gene B1B2 | chr2:14522716-14523513 REVERSE LENGTH=265	AT2G34420.1	TAIR10_pep_20101214_contaminants.fasta	28054.7	1	8	13	43	0.0317	0.449
201210Orbi_Dave_Gelsample (1)	Uncategorized Sample	BioSample 1	P30 (F020966)	| Symbols: LHB1B2, LHCB1.5 | photosystem II light harvesting complex gene B1B2 | chr2:14522716-14523513 REVERSE LENGTH=265	AT2G34420.1	TAIR10_pep_20101214_contaminants.fasta	28054.7	0.998	2	2	3	0.0042	0.0679
201210Orbi_Dave_Gelsample (1)	Uncategorized Sample	BioSample 1	P35 (F020917)	| Symbols: LHB1B2, LHCB1.5 | photosystem II light harvesting complex gene B1B2 | chr2:14522716-14523513 REVERSE LENGTH=265	AT2G34420.1	TAIR10_pep_20101214_contaminants.fasta	28054.7	0.998	2	2	3	0.0028	0.0604
201210Orbi_Dave_Gelsample (1)	Uncategorized Sample	BioSample 1	P41 (F020922)	| Symbols: LHB1B2, LHCB1.5 | photosystem II light harvesting complex gene B1B2 | chr2:14522716-14523513 REVERSE LENGTH=265	AT2G34420.1	TAIR10_pep_20101214_contaminants.fasta	28054.7	1	3	3	5	0.0036	0.0679
201210Orbi_Dave_Gelsample (1)	Uncategorized Sample	BioSample 1	P42 (F020923)	| Symbols: LHB1B2, LHCB1.5 | photosystem II light harvesting complex gene B1B2 | chr2:14522716-14523513 REVERSE LENGTH=265	AT2G34420.1	TAIR10_pep_20101214_contaminants.fasta	28054.7	1	5	7	10	0.0078	0.177
201210Orbi_Dave_Gelsample (1)	Uncategorized Sample	BioSample 1	P45 (F020926)	| Symbols: LHB1B2, LHCB1.5 | photosystem II light harvesting complex gene B1B2 | chr2:14522716-14523513 REVERSE LENGTH=265	AT2G34420.1	TAIR10_pep_20101214_contaminants.fasta	28054.7	1	3	4	5	0.0037	0.0679
201210Orbi_Dave_Gelsample (1)	Uncategorized Sample	BioSample 1	P46 (F020927)	| Symbols: LHB1B2, LHCB1.5 | photosystem II light harvesting complex gene B1B2 | chr2:14522716-14523513 REVERSE LENGTH=265	AT2G34420.1	TAIR10_pep_20101214_contaminants.fasta	28054.7	1	4	4	5	0.0035	0.113
201210Orbi_Dave_Gelsample (1)	Uncategorized Sample	BioSample 1	P51 (F020932)	| Symbols: LHB1B2, LHCB1.5 | photosystem II light harvesting complex gene B1B2 | chr2:14522716-14523513 REVERSE LENGTH=265	AT2G34420.1	TAIR10_pep_20101214_contaminants.fasta	28054.7	1	3	3	6	0.0047	0.106
201210Orbi_Dave_Gelsample (1)	Uncategorized Sample	BioSample 1	P56 (F020937)	| Symbols: LHB1B2, LHCB1.5 | photosystem II light harvesting complex gene B1B2 | chr2:14522716-14523513 REVERSE LENGTH=265	AT2G34420.1	TAIR10_pep_20101214_contaminants.fasta	28054.7	0.998	2	2	2	0.0017	0.0377
201210Orbi_Dave_Gelsample (1)	Uncategorized Sample	BioSample 1	P58 (F020939)	| Symbols: LHB1B2, LHCB1.5 | photosystem II light harvesting complex gene B1B2 | chr2:14522716-14523513 REVERSE LENGTH=265	AT2G34420.1	TAIR10_pep_20101214_contaminants.fasta	28054.7	1	3	3	4	0.0029	0.106
201210Orbi_Dave_Gelsample (1)	Uncategorized Sample	BioSample 1	P34 (F020916)	| Symbols: | AICARFT/IMPCHase bienzyme family protein | chr2:14765347-14768269 REVERSE LENGTH=596	AT2G35040.1,AT2G35040.2	TAIR10_pep_20101214_contaminants.fasta	64906.7	1	5	6	11	0.0091	0.148
201211Orbi_Dave_Gelsample2	Uncategorized Sample	BioSample 1	S08 (F020984)	| Symbols: | AICARFT/IMPCHase bienzyme family protein | chr2:14765347-14768269 REVERSE LENGTH=596	AT2G35040.1,AT2G35040.2	TAIR10_pep_20101214_contaminants.fasta	64906.7	1	19	20	41	0.027	0.332
201211Orbi_Dave_Gelsample2	Uncategorized Sample	BioSample 1	S09 (F020985)	| Symbols: | AICARFT/IMPCHase bienzyme family protein | chr2:14765347-14768269 REVERSE LENGTH=596	AT2G35040.1,AT2G35040.2	TAIR10_pep_20101214_contaminants.fasta	64906.7	1	29	35	76	0.0503	0.554
201210Orbi_Dave_Gelsample (1)	Uncategorized Sample	BioSample 1	P14 (F020965)	| Symbols: | RNA-binding (RRM/RBD/RNP motifs) family protein | chr2:14898341-14899590 FORWARD LENGTH=308	AT2G35410.1	TAIR10_pep_20101214_contaminants.fasta	33786.3	0.998	2	2	3	0.0042	0.0844
201211Orbi_Dave_Gelsample2	Uncategorized Sample	BioSample 1	S18 (F020994)	| Symbols: | RNA-binding (RRM/RBD/RNP motifs) family protein | chr2:14898341-14899590 FORWARD LENGTH=308	AT2G35410.1	TAIR10_pep_20101214_contaminants.fasta	33786.3	1	4	4	12	0.0101	0.174
201211Orbi_Dave_Gelsample2	Uncategorized Sample	BioSample 1	S58 (F021055)	| Symbols: | RNA-binding (RRM/RBD/RNP motifs) family protein | chr2:14898341-14899590 FORWARD LENGTH=308	AT2G35410.1	TAIR10_pep_20101214_contaminants.fasta	33786.3	1	4	5	21	0.011	0.352
201210Orbi_Dave_Gelsample (1)	Uncategorized Sample	BioSample 1	P53 (F020934)	| Symbols: | catalytics;hydrolases | chr2:14903201-14905361 REVERSE LENGTH=346	AT2G35450.1	TAIR10_pep_20101214_contaminants.fasta	38163.8	0.998	2	2	2	0.0013	0.0578
201210Orbi_Dave_Gelsample (1)	Uncategorized Sample	BioSample 1	P54 (F020935)	| Symbols: | catalytics;hydrolases | chr2:14903201-14905361 REVERSE LENGTH=346	AT2G35450.1	TAIR10_pep_20101214_contaminants.fasta	38163.8	0.998	2	2	2	0.0016	0.0694
201211Orbi_Dave_Gelsample2	Uncategorized Sample	BioSample 1	S20 (F020996)	| Symbols: | catalytics;hydrolases | chr2:14903201-14905361 REVERSE LENGTH=346	AT2G35450.1	TAIR10_pep_20101214_contaminants.fasta	38163.8	1	3	3	4	0.00303	0.0896
201211Orbi_Dave_Gelsample2	Uncategorized Sample	BioSample 1	S21 (F020997)	| Symbols: | catalytics;hydrolases | chr2:14903201-14905361 REVERSE LENGTH=346	AT2G35450.1	TAIR10_pep_20101214_contaminants.fasta	38163.8	1	9	11	22	0.0168	0.286
201210Orbi_Dave_Gelsample (1)	Uncategorized Sample	BioSample 1	P14 (F020965)	| Symbols: SKL2 | shikimate kinase like 2 | chr2:14914038-14915909 FORWARD LENGTH=387	AT2G35500.1	TAIR10_pep_20101214_contaminants.fasta	42688.2	1	3	3	5	0.007	0.114
201210Orbi_Dave_Gelsample (1)	Uncategorized Sample	BioSample 1	P51 (F020932)	| Symbols: SKL2 | shikimate kinase like 2 | chr2:14914038-14915909 FORWARD LENGTH=387	AT2G35500.1	TAIR10_pep_20101214_contaminants.fasta	42688.2	1	4	4	4	0.0031	0.132
201211Orbi_Dave_Gelsample2	Uncategorized Sample	BioSample 1	S18 (F020994)	| Symbols: SKL2 | shikimate kinase like 2 | chr2:14914038-14915909 FORWARD LENGTH=387	AT2G35500.1	TAIR10_pep_20101214_contaminants.fasta	42688.2	1	4	4	5	0.00468	0.134
201211Orbi_Dave_Gelsample2	Uncategorized Sample	BioSample 1	S58 (F021055)	| Symbols: SKL2 | shikimate kinase like 2 | chr2:14914038-14915909 FORWARD LENGTH=387	AT2G35500.1	TAIR10_pep_20101214_contaminants.fasta	42688.2	1	8	9	17	0.0136	0.238
201210Orbi_Dave_Gelsample (1)	Uncategorized Sample	BioSample 1	P36 (F020967)	| Symbols: LOS2, ENO2 | Enolase | chr2:15321081-15323786 REVERSE LENGTH=444	AT2G36530.1	TAIR10_pep_20101214_contaminants.fasta	47719.7	1	2	2	2	0.0032	0.0608
201210Orbi_Dave_Gelsample (1)	Uncategorized Sample	BioSample 1	P40 (F020921)	| Symbols: LOS2, ENO2 | Enolase | chr2:15321081-15323786 REVERSE LENGTH=444	AT2G36530.1	TAIR10_pep_20101214_contaminants.fasta	47719.7	1	3	3	4	0.0022	0.0856
201211Orbi_Dave_Gelsample2	Uncategorized Sample	BioSample 1	S01 (F020977)	| Symbols: LOS2, ENO2 | Enolase | chr2:15321081-15323786 REVERSE LENGTH=444	AT2G36530.1	TAIR10_pep_20101214_contaminants.fasta	47719.7	1	6	6	12	0.0141	0.178
201211Orbi_Dave_Gelsample2	Uncategorized Sample	BioSample 1	S22 (F020998)	| Symbols: LOS2, ENO2 | Enolase | chr2:15321081-15323786 REVERSE LENGTH=444	AT2G36530.1	TAIR10_pep_20101214_contaminants.fasta	47719.7	1	4	5	7	0.00541	0.122
201211Orbi_Dave_Gelsample2	Uncategorized Sample	BioSample 1	S53 (F021050)	| Symbols: LOS2, ENO2 | Enolase | chr2:15321081-15323786 REVERSE LENGTH=444	AT2G36530.1	TAIR10_pep_20101214_contaminants.fasta	47719.7	1	6	9	14	0.0103	0.178
201210Orbi_Dave_Gelsample (1)	Uncategorized Sample	BioSample 1	P38 (F020919)	| Symbols: MAT3 | methionine adenosyltransferase 3 | chr2:15479721-15480893 REVERSE LENGTH=390	AT2G36880.1,AT2G36880.2	TAIR10_pep_20101214_contaminants.fasta	42497.8	1	11	13	5	0.003	0.111
201210Orbi_Dave_Gelsample (1)	Uncategorized Sample	BioSample 1	P40 (F020921)	| Symbols: MAT3 | methionine adenosyltransferase 3 | chr2:15479721-15480893 REVERSE LENGTH=390	AT2G36880.1,AT2G36880.2	TAIR10_pep_20101214_contaminants.fasta	42497.8	1	7	8	3	0.0018	0.0657
201211Orbi_Dave_Gelsample2	Uncategorized Sample	BioSample 1	S55 (F021052)	| Symbols: MAT3 | methionine adenosyltransferase 3 | chr2:15479721-15480893 REVERSE LENGTH=390	AT2G36880.1,AT2G36880.2	TAIR10_pep_20101214_contaminants.fasta	42497.8	1	3	3	4	0.00269	0.0821
201211Orbi_Dave_Gelsample2	Uncategorized Sample	BioSample 1	S16 (F020992)	| Symbols: | NAD(P)-linked oxidoreductase superfamily protein | chr2:15831995-15833742 FORWARD LENGTH=311	AT2G37760.1,AT2G37760.2	TAIR10_pep_20101214_contaminants.fasta	34685.7	1	13	15	25	0.0179	0.402
201211Orbi_Dave_Gelsample2	Uncategorized Sample	BioSample 1	S17 (F020993)	| Symbols: | NAD(P)-linked oxidoreductase superfamily protein | chr2:15831995-15833742 FORWARD LENGTH=311	AT2G37760.1,AT2G37760.2	TAIR10_pep_20101214_contaminants.fasta	34685.7	1	8	8	14	0.0084	0.304
201210Orbi_Dave_Gelsample (1)	Uncategorized Sample	BioSample 1	P49 (F020930)	| Symbols: | NAD(P)-linked oxidoreductase superfamily protein | chr2:15831995-15833742 FORWARD LENGTH=311	AT2G37760.1,AT2G37760.2,AT2G37760.3,AT2G37760.4,AT2G37760.5	TAIR10_pep_20101214_contaminants.fasta	34685.7	1	4	4	15	0.01	0.24
201211Orbi_Dave_Gelsample2	Uncategorized Sample	BioSample 1	S17 (F020993)	| Symbols: | NAD(P)-linked oxidoreductase superfamily protein | chr2:15838838-15840752 FORWARD LENGTH=314	AT2G37790.1	TAIR10_pep_20101214_contaminants.fasta	34913.5	1	13	16	67	0.0481	0.54
201210Orbi_Dave_Gelsample (1)	Uncategorized Sample	BioSample 1	P52 (F020933)	| Symbols: ATPDX1.1, PDX1.1 | pyridoxine biosynthesis 1.1 | chr2:16011475-16012404 FORWARD LENGTH=309	AT2G38230.1	TAIR10_pep_20101214_contaminants.fasta	32861.1	1	5	6	9	0.0067	0.191
201210Orbi_Dave_Gelsample (1)	Uncategorized Sample	BioSample 1	P53 (F020934)	| Symbols: ATPDX1.1, PDX1.1 | pyridoxine biosynthesis 1.1 | chr2:16011475-16012404 FORWARD LENGTH=309	AT2G38230.1	TAIR10_pep_20101214_contaminants.fasta	32861.1	1	7	8	14	0.0091	0.252
201210Orbi_Dave_Gelsample (1)	Uncategorized Sample	BioSample 1	P54 (F020935)	| Symbols: ATPDX1.1, PDX1.1 | pyridoxine biosynthesis 1.1 | chr2:16011475-16012404 FORWARD LENGTH=309	AT2G38230.1	TAIR10_pep_20101214_contaminants.fasta	32861.1	1	8	10	14	0.011	0.314
201210Orbi_Dave_Gelsample (1)	Uncategorized Sample	BioSample 1	P55 (F020936)	| Symbols: ATPDX1.1, PDX1.1 | pyridoxine biosynthesis 1.1 | chr2:16011475-16012404 FORWARD LENGTH=309	AT2G38230.1	TAIR10_pep_20101214_contaminants.fasta	32861.1	1	10	13	33	0.0265	0.307
201211Orbi_Dave_Gelsample2	Uncategorized Sample	BioSample 1	S21 (F020997)	| Symbols: ATPDX1.1, PDX1.1 | pyridoxine biosynthesis 1.1 | chr2:16011475-16012404 FORWARD LENGTH=309	AT2G38230.1	TAIR10_pep_20101214_contaminants.fasta	32861.1	1	5	5	12	0.00916	0.353
201210Orbi_Dave_Gelsample (1)	Uncategorized Sample	BioSample 1	P43 (F020924)	| Symbols: MVD1, ATMVD1 | mevalonate diphosphate decarboxylase 1 | chr2:16180918-16183785 REVERSE LENGTH=412	AT2G38700.1	TAIR10_pep_20101214_contaminants.fasta	45586.5	1	14	18	36	0.0188	0.417
201211Orbi_Dave_Gelsample2	Uncategorized Sample	BioSample 1	S10 (F020986)	| Symbols: MVD1, ATMVD1 | mevalonate diphosphate decarboxylase 1 | chr2:16180918-16183785 REVERSE LENGTH=412	AT2G38700.1	TAIR10_pep_20101214_contaminants.fasta	45586.5	1	9	9	19	0.0144	0.24
201210Orbi_Dave_Gelsample (1)	Uncategorized Sample	BioSample 1	P42 (F020923)	| Symbols: YLS5 | Class I glutamine amidotransferase-like superfamily protein | chr2:16233629-16235207 REVERSE LENGTH=389	AT2G38860.1,AT2G38860.2	TAIR10_pep_20101214_contaminants.fasta	41668.3	1	3	3	3	0.0023	0.0925
201211Orbi_Dave_Gelsample2	Uncategorized Sample	BioSample 1	S50 (F021047)	| Symbols: YLS5 | Class I glutamine amidotransferase-like superfamily protein | chr2:16233629-16235207 REVERSE LENGTH=389	AT2G38860.1,AT2G38860.2	TAIR10_pep_20101214_contaminants.fasta	41668.3	1	9	9	15	0.00954	0.206
201210Orbi_Dave_Gelsample (1)	Uncategorized Sample	BioSample 1	P05 (F020904)	| Symbols: RCA | rubisco activase | chr2:16570951-16573345 REVERSE LENGTH=474	AT2G39730.1	TAIR10_pep_20101214_contaminants.fasta	51982	1	6	7	8	0.0063	0.188
201210Orbi_Dave_Gelsample (1)	Uncategorized Sample	BioSample 1	P06 (F020905)	| Symbols: RCA | rubisco activase | chr2:16570951-16573345 REVERSE LENGTH=474	AT2G39730.1	TAIR10_pep_20101214_contaminants.fasta	51982	1	17	24	153	0.102	0.475
201210Orbi_Dave_Gelsample (1)	Uncategorized Sample	BioSample 1	P07 (F020906)	| Symbols: RCA | rubisco activase | chr2:16570951-16573345 REVERSE LENGTH=474	AT2G39730.1	TAIR10_pep_20101214_contaminants.fasta	51982	1	4	4	6	0.0042	0.135
201210Orbi_Dave_Gelsample (1)	Uncategorized Sample	BioSample 1	P09 (F020907)	| Symbols: RCA | rubisco activase | chr2:16570951-16573345 REVERSE LENGTH=474	AT2G39730.1	TAIR10_pep_20101214_contaminants.fasta	51982	0.999	2	2	2	0.0023	0.0823
201210Orbi_Dave_Gelsample (1)	Uncategorized Sample	BioSample 1	P12 (F020877)	| Symbols: RCA | rubisco activase | chr2:16570951-16573345 REVERSE LENGTH=474	AT2G39730.1	TAIR10_pep_20101214_contaminants.fasta	51982	1	23	37	313	0.354	0.62
201210Orbi_Dave_Gelsample (1)	Uncategorized Sample	BioSample 1	P19 (F020883)	| Symbols: RCA | rubisco activase | chr2:16570951-16573345 REVERSE LENGTH=474	AT2G39730.1	TAIR10_pep_20101214_contaminants.fasta	51982	1	3	3	4	0.0051	0.0886
201210Orbi_Dave_Gelsample (1)	Uncategorized Sample	BioSample 1	P21 (F020886)	| Symbols: RCA | rubisco activase | chr2:16570951-16573345 REVERSE LENGTH=474	AT2G39730.1	TAIR10_pep_20101214_contaminants.fasta	51982	1	6	6	7	0.0055	0.217
201210Orbi_Dave_Gelsample (1)	Uncategorized Sample	BioSample 1	P22 (F020887)	| Symbols: RCA | rubisco activase | chr2:16570951-16573345 REVERSE LENGTH=474	AT2G39730.1	TAIR10_pep_20101214_contaminants.fasta	51982	1	7	7	8	0.0071	0.222
201210Orbi_Dave_Gelsample (1)	Uncategorized Sample	BioSample 1	P27 (F020910)	| Symbols: RCA | rubisco activase | chr2:16570951-16573345 REVERSE LENGTH=474	AT2G39730.1	TAIR10_pep_20101214_contaminants.fasta	51982	1	9	9	14	0.0093	0.251
201210Orbi_Dave_Gelsample (1)	Uncategorized Sample	BioSample 1	P28 (F020911)	| Symbols: RCA | rubisco activase | chr2:16570951-16573345 REVERSE LENGTH=474	AT2G39730.1	TAIR10_pep_20101214_contaminants.fasta	51982	1	11	11	16	0.0108	0.319
201210Orbi_Dave_Gelsample (1)	Uncategorized Sample	BioSample 1	P30 (F020966)	| Symbols: RCA | rubisco activase | chr2:16570951-16573345 REVERSE LENGTH=474	AT2G39730.1	TAIR10_pep_20101214_contaminants.fasta	51982	1	8	9	17	0.0236	0.236
201210Orbi_Dave_Gelsample (1)	Uncategorized Sample	BioSample 1	P31 (F020913)	| Symbols: RCA | rubisco activase | chr2:16570951-16573345 REVERSE LENGTH=474	AT2G39730.1	TAIR10_pep_20101214_contaminants.fasta	51982	1	4	4	5	0.0034	0.124
201210Orbi_Dave_Gelsample (1)	Uncategorized Sample	BioSample 1	P35 (F020917)	| Symbols: RCA | rubisco activase | chr2:16570951-16573345 REVERSE LENGTH=474	AT2G39730.1	TAIR10_pep_20101214_contaminants.fasta	51982	0.998	2	2	3	0.0028	0.0527
201210Orbi_Dave_Gelsample (1)	Uncategorized Sample	BioSample 1	P39 (F020920)	| Symbols: RCA | rubisco activase | chr2:16570951-16573345 REVERSE LENGTH=474	AT2G39730.1	TAIR10_pep_20101214_contaminants.fasta	51982	1	14	17	34	0.0223	0.367
201210Orbi_Dave_Gelsample (1)	Uncategorized Sample	BioSample 1	P40 (F020921)	| Symbols: RCA | rubisco activase | chr2:16570951-16573345 REVERSE LENGTH=474	AT2G39730.1	TAIR10_pep_20101214_contaminants.fasta	51982	0.997	2	2	2	0.0011	0.0506
201210Orbi_Dave_Gelsample (1)	Uncategorized Sample	BioSample 1	P41 (F020922)	| Symbols: RCA | rubisco activase | chr2:16570951-16573345 REVERSE LENGTH=474	AT2G39730.1	TAIR10_pep_20101214_contaminants.fasta	51982	1	5	5	9	0.0065	0.141
201210Orbi_Dave_Gelsample (1)	Uncategorized Sample	BioSample 1	P42 (F020923)	| Symbols: RCA | rubisco activase | chr2:16570951-16573345 REVERSE LENGTH=474	AT2G39730.1	TAIR10_pep_20101214_contaminants.fasta	51982	1	10	10	21	0.0163	0.314
201210Orbi_Dave_Gelsample (1)	Uncategorized Sample	BioSample 1	P43 (F020924)	| Symbols: RCA | rubisco activase | chr2:16570951-16573345 REVERSE LENGTH=474	AT2G39730.1	TAIR10_pep_20101214_contaminants.fasta	51982	1	10	11	20	0.0105	0.283
201210Orbi_Dave_Gelsample (1)	Uncategorized Sample	BioSample 1	P44 (F020925)	| Symbols: RCA | rubisco activase | chr2:16570951-16573345 REVERSE LENGTH=474	AT2G39730.1	TAIR10_pep_20101214_contaminants.fasta	51982	1	16	19	36	0.0203	0.439
201210Orbi_Dave_Gelsample (1)	Uncategorized Sample	BioSample 1	P53 (F020934)	| Symbols: RCA | rubisco activase | chr2:16570951-16573345 REVERSE LENGTH=474	AT2G39730.1	TAIR10_pep_20101214_contaminants.fasta	51982	0.998	2	2	3	0.002	0.0506
201210Orbi_Dave_Gelsample (1)	Uncategorized Sample	BioSample 1	P54 (F020935)	| Symbols: RCA | rubisco activase | chr2:16570951-16573345 REVERSE LENGTH=474	AT2G39730.1	TAIR10_pep_20101214_contaminants.fasta	51982	0.998	2	2	2	0.0016	0.0506
201210Orbi_Dave_Gelsample (1)	Uncategorized Sample	BioSample 1	P58 (F020939)	| Symbols: RCA | rubisco activase | chr2:16570951-16573345 REVERSE LENGTH=474	AT2G39730.1	TAIR10_pep_20101214_contaminants.fasta	51982	1	3	3	5	0.0036	0.0717
201211Orbi_Dave_Gelsample2	Uncategorized Sample	BioSample 1	S03 (F020979)	| Symbols: RCA | rubisco activase | chr2:16570951-16573345 REVERSE LENGTH=474	AT2G39730.1	TAIR10_pep_20101214_contaminants.fasta	51982	1	11	11	23	0.0164	0.291
201211Orbi_Dave_Gelsample2	Uncategorized Sample	BioSample 1	S04 (F020980)	| Symbols: RCA | rubisco activase | chr2:16570951-16573345 REVERSE LENGTH=474	AT2G39730.1	TAIR10_pep_20101214_contaminants.fasta	51982	1	8	8	12	0.00775	0.219
201211Orbi_Dave_Gelsample2	Uncategorized Sample	BioSample 1	S11 (F020987)	| Symbols: RCA | rubisco activase | chr2:16570951-16573345 REVERSE LENGTH=474	AT2G39730.1	TAIR10_pep_20101214_contaminants.fasta	51982	1	29	44	216	0.152	0.614
201211Orbi_Dave_Gelsample2	Uncategorized Sample	BioSample 1	S14 (F020990)	| Symbols: RCA | rubisco activase | chr2:16570951-16573345 REVERSE LENGTH=474	AT2G39730.1	TAIR10_pep_20101214_contaminants.fasta	51982	1	2	2	2	0.00151	0.0506
201211Orbi_Dave_Gelsample2	Uncategorized Sample	BioSample 1	S21 (F020997)	| Symbols: RCA | rubisco activase | chr2:16570951-16573345 REVERSE LENGTH=474	AT2G39730.1	TAIR10_pep_20101214_contaminants.fasta	51982	1	9	9	15	0.0115	0.243
201211Orbi_Dave_Gelsample2	Uncategorized Sample	BioSample 1	S24 (F021000)	| Symbols: RCA | rubisco activase | chr2:16570951-16573345 REVERSE LENGTH=474	AT2G39730.1	TAIR10_pep_20101214_contaminants.fasta	51982	1	3	3	5	0.00347	0.0992
201211Orbi_Dave_Gelsample2	Uncategorized Sample	BioSample 1	S29 (F021005)	| Symbols: RCA | rubisco activase | chr2:16570951-16573345 REVERSE LENGTH=474	AT2G39730.1	TAIR10_pep_20101214_contaminants.fasta	51982	1	11	16	39	0.0367	0.207
201211Orbi_Dave_Gelsample2	Uncategorized Sample	BioSample 1	S50 (F021047)	| Symbols: RCA | rubisco activase | chr2:16570951-16573345 REVERSE LENGTH=474	AT2G39730.1	TAIR10_pep_20101214_contaminants.fasta	51982	1	13	15	31	0.0197	0.312
201211Orbi_Dave_Gelsample2	Uncategorized Sample	BioSample 1	S51 (F021048)	| Symbols: RCA | rubisco activase | chr2:16570951-16573345 REVERSE LENGTH=474	AT2G39730.1	TAIR10_pep_20101214_contaminants.fasta	51982	1	4	4	5	0.00397	0.12
201211Orbi_Dave_Gelsample2	Uncategorized Sample	BioSample 1	S56 (F021053)	| Symbols: RCA | rubisco activase | chr2:16570951-16573345 REVERSE LENGTH=474	AT2G39730.1	TAIR10_pep_20101214_contaminants.fasta	51982	1	3	3	6	0.00503	0.0886
201210Orbi_Dave_Gelsample (1)	Uncategorized Sample	BioSample 1	P48 (F020929)	| Symbols: | S-adenosyl-L-methionine-dependent methyltransferases superfamily protein | chr2:17121499-17123064 FORWARD LENGTH=352	AT2G41040.1	TAIR10_pep_20101214_contaminants.fasta	39231.7	1	12	17	40	0.0299	0.398
201211Orbi_Dave_Gelsample2	Uncategorized Sample	BioSample 1	S14 (F020990)	| Symbols: | S-adenosyl-L-methionine-dependent methyltransferases superfamily protein | chr2:17121499-17123064 FORWARD LENGTH=352	AT2G41040.1	TAIR10_pep_20101214_contaminants.fasta	39231.7	1	12	13	4	0.0031	0.115
201210Orbi_Dave_Gelsample (1)	Uncategorized Sample	BioSample 1	P13 (F020878)	| Symbols: VLN2, ATVLN2 | villin 2 | chr2:17410962-17416878 REVERSE LENGTH=976	AT2G41740.1	TAIR10_pep_20101214_contaminants.fasta	107844	1	29	37	71	0.128	0.393
201211Orbi_Dave_Gelsample2	Uncategorized Sample	BioSample 1	S02 (F020978)	| Symbols: VLN2, ATVLN2 | villin 2 | chr2:17410962-17416878 REVERSE LENGTH=976	AT2G41740.1	TAIR10_pep_20101214_contaminants.fasta	107844	1	4	4	8	0.0045	0.0632
201210Orbi_Dave_Gelsample (1)	Uncategorized Sample	BioSample 1	P20 (F020885)	| Symbols: ATPPC2, PPC2 | phosphoenolpyruvate carboxylase 2 | chr2:17734541-17738679 REVERSE LENGTH=963	AT2G42600.1,AT2G42600.2	TAIR10_pep_20101214_contaminants.fasta	109757	1	21	23	38	0.0298	0.298
201211Orbi_Dave_Gelsample2	Uncategorized Sample	BioSample 1	S01 (F020977)	| Symbols: ATPPC2, PPC2 | phosphoenolpyruvate carboxylase 2 | chr2:17734541-17738679 REVERSE LENGTH=963	AT2G42600.1,AT2G42600.2	TAIR10_pep_20101214_contaminants.fasta	109757	1	4	4	8	0.00937	0.0478
201210Orbi_Dave_Gelsample (1)	Uncategorized Sample	BioSample 1	P64 (F020945)	| Symbols: | FKBP-like peptidyl-prolyl cis-trans isomerase family protein | chr2:18073995-18075385 REVERSE LENGTH=223	AT2G43560.1	TAIR10_pep_20101214_contaminants.fasta	23564.9	1	6	6	9	0.0093	0.48
201211Orbi_Dave_Gelsample2	Uncategorized Sample	BioSample 1	S43 (F021040)	| Symbols: | FKBP-like peptidyl-prolyl cis-trans isomerase family protein | chr2:18073995-18075385 REVERSE LENGTH=223	AT2G43560.1	TAIR10_pep_20101214_contaminants.fasta	23564.9	1	10	12	39	0.0524	0.457
201210Orbi_Dave_Gelsample (1)	Uncategorized Sample	BioSample 1	P48 (F020929)	| Symbols: OASB, ACS1, CPACS1, ATCS-B | O-acetylserine (thiol) lyase B | chr2:18129604-18132322 REVERSE LENGTH=392	AT2G43750.1,AT2G43750.2	TAIR10_pep_20101214_contaminants.fasta	41657.6	1	22	26	54	0.0404	0.74
201210Orbi_Dave_Gelsample (1)	Uncategorized Sample	BioSample 1	P49 (F020930)	| Symbols: OASB, ACS1, CPACS1, ATCS-B | O-acetylserine (thiol) lyase B | chr2:18129604-18132322 REVERSE LENGTH=392	AT2G43750.1,AT2G43750.2	TAIR10_pep_20101214_contaminants.fasta	41657.6	0.998	2	2	3	0.0018	0.0587
201210Orbi_Dave_Gelsample (1)	Uncategorized Sample	BioSample 1	P50 (F020931)	| Symbols: OASB, ACS1, CPACS1, ATCS-B | O-acetylserine (thiol) lyase B | chr2:18129604-18132322 REVERSE LENGTH=392	AT2G43750.1,AT2G43750.2	TAIR10_pep_20101214_contaminants.fasta	41657.6	1	21	26	59	0.0377	0.602
201211Orbi_Dave_Gelsample2	Uncategorized Sample	BioSample 1	S14 (F020990)	| Symbols: OASB, ACS1, CPACS1, ATCS-B | O-acetylserine (thiol) lyase B | chr2:18129604-18132322 REVERSE LENGTH=392	AT2G43750.1,AT2G43750.2	TAIR10_pep_20101214_contaminants.fasta	41657.6	1	17	17	33	0.0248	0.574
201210Orbi_Dave_Gelsample (1)	Uncategorized Sample	BioSample 1	P46 (F020927)	| Symbols: | Late embryogenesis abundant protein, group 2 | chr2:18226922-18227988 FORWARD LENGTH=325	AT2G44060.1,AT2G44060.2	TAIR10_pep_20101214_contaminants.fasta	36038	1	8	8	5	0.0061	0.154
201211Orbi_Dave_Gelsample2	Uncategorized Sample	BioSample 1	S12 (F020988)	| Symbols: | Late embryogenesis abundant protein, group 2 | chr2:18226922-18227988 FORWARD LENGTH=325	AT2G44060.1,AT2G44060.2	TAIR10_pep_20101214_contaminants.fasta	36038	1	3	3	3	0.00208	0.0954
201211Orbi_Dave_Gelsample2	Uncategorized Sample	BioSample 1	S15 (F020991)	| Symbols: | Late embryogenesis abundant protein, group 2 | chr2:18226922-18227988 FORWARD LENGTH=325	AT2G44060.1,AT2G44060.2	TAIR10_pep_20101214_contaminants.fasta	36038	1	5	5	9	0.0107	0.178
201210Orbi_Dave_Gelsample (1)	Uncategorized Sample	BioSample 1	P10 (F020875)	| Symbols: MTHFR2 | methylenetetrahydrofolate reductase 2 | chr2:18262301-18265185 FORWARD LENGTH=594	AT2G44160.1	TAIR10_pep_20101214_contaminants.fasta	66803.5	1	7	8	17	0.0142	0.171
201211Orbi_Dave_Gelsample2	Uncategorized Sample	BioSample 1	S56 (F021053)	| Symbols: MTHFR2 | methylenetetrahydrofolate reductase 2 | chr2:18262301-18265185 FORWARD LENGTH=594	AT2G44160.1	TAIR10_pep_20101214_contaminants.fasta	66803.5	0.999	2	2	3	0.00251	0.118
201210Orbi_Dave_Gelsample (1)	Uncategorized Sample	BioSample 1	P40 (F020921)	| Symbols: ATCS, CSY4 | Citrate synthase family protein | chr2:18316673-18320524 FORWARD LENGTH=473	AT2G44350.1,AT2G44350.2	TAIR10_pep_20101214_contaminants.fasta	52655	1	3	3	4	0.0022	0.0761
201211Orbi_Dave_Gelsample2	Uncategorized Sample	BioSample 1	S55 (F021052)	| Symbols: ATCS, CSY4 | Citrate synthase family protein | chr2:18316673-18320524 FORWARD LENGTH=473	AT2G44350.1,AT2G44350.2	TAIR10_pep_20101214_contaminants.fasta	52655	1	3	3	5	0.00336	0.0761
201210Orbi_Dave_Gelsample (1)	Uncategorized Sample	BioSample 1	P73 (F020954)	| Symbols: | Tetratricopeptide repeat (TPR)-like superfamily protein | chr2:18524419-18526502 FORWARD LENGTH=224	AT2G44920.2	TAIR10_pep_20101214_contaminants.fasta	23779.1	1	6	7	3	0.0042	0.0657
201211Orbi_Dave_Gelsample2	Uncategorized Sample	BioSample 1	S49 (F021046)	| Symbols: | Tetratricopeptide repeat (TPR)-like superfamily protein | chr2:18524419-18526502 FORWARD LENGTH=224	AT2G44920.2	TAIR10_pep_20101214_contaminants.fasta	23779.1	1	6	6	7	0.0048	0.107
201210Orbi_Dave_Gelsample (1)	Uncategorized Sample	BioSample 1	P11 (F020876)	| Symbols: CA1, ATBCA1, SABP3, ATSABP3 | carbonic anhydrase 1 | chr3:194853-196716 REVERSE LENGTH=270	AT3G01500.1,AT3G01500.2	TAIR10_pep_20101214_contaminants.fasta	37450.7	1	4	5	7	0.0045	0.167
201210Orbi_Dave_Gelsample (1)	Uncategorized Sample	BioSample 1	P15 (F020879)	| Symbols: CA1, ATBCA1, SABP3, ATSABP3 | carbonic anhydrase 1 | chr3:194853-196716 REVERSE LENGTH=270	AT3G01500.1,AT3G01500.2	TAIR10_pep_20101214_contaminants.fasta	37450.7	1	9	13	22	0.0162	0.291
201210Orbi_Dave_Gelsample (1)	Uncategorized Sample	BioSample 1	P48 (F020929)	| Symbols: CA1, ATBCA1, SABP3, ATSABP3 | carbonic anhydrase 1 | chr3:194853-196716 REVERSE LENGTH=270	AT3G01500.1,AT3G01500.2	TAIR10_pep_20101214_contaminants.fasta	37450.7	0.999	2	3	3	0.0022	0.098
201210Orbi_Dave_Gelsample (1)	Uncategorized Sample	BioSample 1	P51 (F020932)	| Symbols: CA1, ATBCA1, SABP3, ATSABP3 | carbonic anhydrase 1 | chr3:194853-196716 REVERSE LENGTH=270	AT3G01500.1,AT3G01500.2	TAIR10_pep_20101214_contaminants.fasta	37450.7	1	4	4	5	0.0039	0.133
201210Orbi_Dave_Gelsample (1)	Uncategorized Sample	BioSample 1	P52 (F020933)	| Symbols: CA1, ATBCA1, SABP3, ATSABP3 | carbonic anhydrase 1 | chr3:194853-196716 REVERSE LENGTH=270	AT3G01500.1,AT3G01500.2	TAIR10_pep_20101214_contaminants.fasta	37450.7	1	5	5	6	0.0045	0.19
201210Orbi_Dave_Gelsample (1)	Uncategorized Sample	BioSample 1	P57 (F020938)	| Symbols: CA1, ATBCA1, SABP3, ATSABP3 | carbonic anhydrase 1 | chr3:194853-196716 REVERSE LENGTH=270	AT3G01500.1,AT3G01500.2	TAIR10_pep_20101214_contaminants.fasta	37450.7	1	7	9	11	0.0071	0.225
201210Orbi_Dave_Gelsample (1)	Uncategorized Sample	BioSample 1	P58 (F020939)	| Symbols: CA1, ATBCA1, SABP3, ATSABP3 | carbonic anhydrase 1 | chr3:194853-196716 REVERSE LENGTH=270	AT3G01500.1,AT3G01500.2	TAIR10_pep_20101214_contaminants.fasta	37450.7	1	21	32	82	0.0597	0.614
201210Orbi_Dave_Gelsample (1)	Uncategorized Sample	BioSample 1	P59 (F020940)	| Symbols: CA1, ATBCA1, SABP3, ATSABP3 | carbonic anhydrase 1 | chr3:194853-196716 REVERSE LENGTH=270	AT3G01500.1,AT3G01500.2	TAIR10_pep_20101214_contaminants.fasta	37450.7	1	13	17	32	0.0285	0.458
201210Orbi_Dave_Gelsample (1)	Uncategorized Sample	BioSample 1	P60 (F020941)	| Symbols: CA1, ATBCA1, SABP3, ATSABP3 | carbonic anhydrase 1 | chr3:194853-196716 REVERSE LENGTH=270	AT3G01500.1,AT3G01500.2	TAIR10_pep_20101214_contaminants.fasta	37450.7	1	6	7	9	0.0065	0.219
201211Orbi_Dave_Gelsample2	Uncategorized Sample	BioSample 1	S25 (F021001)	| Symbols: CA1, ATBCA1, SABP3, ATSABP3 | carbonic anhydrase 1 | chr3:194853-196716 REVERSE LENGTH=270	AT3G01500.1,AT3G01500.2	TAIR10_pep_20101214_contaminants.fasta	37450.7	1	3	3	4	0.00265	0.415
201211Orbi_Dave_Gelsample2	Uncategorized Sample	BioSample 1	S27 (F021003)	| Symbols: CA1, ATBCA1, SABP3, ATSABP3 | carbonic anhydrase 1 | chr3:194853-196716 REVERSE LENGTH=270	AT3G01500.1,AT3G01500.2	TAIR10_pep_20101214_contaminants.fasta	37450.7	1	5	6	11	0.00875	0.409
201211Orbi_Dave_Gelsample2	Uncategorized Sample	BioSample 1	S28 (F021004)	| Symbols: CA1, ATBCA1, SABP3, ATSABP3 | carbonic anhydrase 1 | chr3:194853-196716 REVERSE LENGTH=270	AT3G01500.1,AT3G01500.2	TAIR10_pep_20101214_contaminants.fasta	37450.7	1	8	13	26	0.0196	0.455
201211Orbi_Dave_Gelsample2	Uncategorized Sample	BioSample 1	S52 (F021049)	| Symbols: CA1, ATBCA1, SABP3, ATSABP3 | carbonic anhydrase 1 | chr3:194853-196716 REVERSE LENGTH=270	AT3G01500.1,AT3G01500.2	TAIR10_pep_20101214_contaminants.fasta	37450.7	1	2	2	3	0.00187	0.0692
201211Orbi_Dave_Gelsample2	Uncategorized Sample	BioSample 1	S58 (F021055)	| Symbols: CA1, ATBCA1, SABP3, ATSABP3 | carbonic anhydrase 1 | chr3:194853-196716 REVERSE LENGTH=270	AT3G01500.1,AT3G01500.2	TAIR10_pep_20101214_contaminants.fasta	37450.7	1	2	2	2	0.0016	0.101
201210Orbi_Dave_Gelsample (1)	Uncategorized Sample	BioSample 1	P34 (F020916)	| Symbols: MPPBETA | Insulinase (Peptidase family M16) protein | chr3:365624-368526 FORWARD LENGTH=531	AT3G02090.1	TAIR10_pep_20101214_contaminants.fasta	59161.4	1	17	27	45	0.0371	0.463
201211Orbi_Dave_Gelsample2	Uncategorized Sample	BioSample 1	S08 (F020984)	| Symbols: MPPBETA | Insulinase (Peptidase family M16) protein | chr3:365624-368526 FORWARD LENGTH=531	AT3G02090.1	TAIR10_pep_20101214_contaminants.fasta	59161.4	1	25	27	53	0.035	0.522
201211Orbi_Dave_Gelsample2	Uncategorized Sample	BioSample 1	S09 (F020985)	| Symbols: MPPBETA | Insulinase (Peptidase family M16) protein | chr3:365624-368526 FORWARD LENGTH=531	AT3G02090.1	TAIR10_pep_20101214_contaminants.fasta	59161.4	1	22	24	45	0.0298	0.433
201210Orbi_Dave_Gelsample (1)	Uncategorized Sample	BioSample 1	P34 (F020916)	| Symbols: ZDS, PDE181, SPC1 | zeta-carotene desaturase | chr3:1342842-1346189 FORWARD LENGTH=558	AT3G04870.1,AT3G04870.2	TAIR10_pep_20101214_contaminants.fasta	61636.2	1	13	15	22	0.0181	0.324
201211Orbi_Dave_Gelsample2	Uncategorized Sample	BioSample 1	S09 (F020985)	| Symbols: ZDS, PDE181, SPC1 | zeta-carotene desaturase | chr3:1342842-1346189 FORWARD LENGTH=558	AT3G04870.1,AT3G04870.2	TAIR10_pep_20101214_contaminants.fasta	61636.2	1	9	9	14	0.00927	0.186
201210Orbi_Dave_Gelsample (1)	Uncategorized Sample	BioSample 1	P61 (F020942)	| Symbols: | elongation factor P (EF-P) family protein | chr3:2654788-2656154 REVERSE LENGTH=236	AT3G08740.1	TAIR10_pep_20101214_contaminants.fasta	26228.6	0.998	2	2	3	0.0028	0.0847
201211Orbi_Dave_Gelsample2	Uncategorized Sample	BioSample 1	S37 (F021019)	| Symbols: | elongation factor P (EF-P) family protein | chr3:2654788-2656154 REVERSE LENGTH=236	AT3G08740.1	TAIR10_pep_20101214_contaminants.fasta	26228.6	1	9	9	15	0.0117	0.386
201211Orbi_Dave_Gelsample2	Uncategorized Sample	BioSample 1	S18 (F020994)	| Symbols: | Ribosomal protein L10 family protein | chr3:2823364-2825020 REVERSE LENGTH=320	AT3G09200.1	TAIR10_pep_20101214_contaminants.fasta	34133.4	1	7	10	19	0.0178	0.278
201211Orbi_Dave_Gelsample2	Uncategorized Sample	BioSample 1	S30 (F021012)	| Symbols: | Ribosomal protein L10 family protein | chr3:2823364-2825020 REVERSE LENGTH=320	AT3G09200.1	TAIR10_pep_20101214_contaminants.fasta	34133.4	1	3	4	5	0.00353	0.194
201211Orbi_Dave_Gelsample2	Uncategorized Sample	BioSample 1	S51 (F021048)	| Symbols: | Ribosomal protein L10 family protein | chr3:2823364-2825020 REVERSE LENGTH=320	AT3G09200.1	TAIR10_pep_20101214_contaminants.fasta	34133.4	1	15	21	76	0.0604	0.419
201211Orbi_Dave_Gelsample2	Uncategorized Sample	BioSample 1	S52 (F021049)	| Symbols: | Ribosomal protein L10 family protein | chr3:2823364-2825020 REVERSE LENGTH=320	AT3G09200.1	TAIR10_pep_20101214_contaminants.fasta	34133.4	1	4	6	14	0.0112	0.209
201211Orbi_Dave_Gelsample2	Uncategorized Sample	BioSample 1	S58 (F021055)	| Symbols: | Ribosomal protein L10 family protein | chr3:2823364-2825020 REVERSE LENGTH=320	AT3G09200.1	TAIR10_pep_20101214_contaminants.fasta	34133.4	1	5	8	2	0.00159	0.279
201210Orbi_Dave_Gelsample (1)	Uncategorized Sample	BioSample 1	P08 (F020969)	| Symbols: | Ribosomal protein L10 family protein | chr3:2823364-2825020 REVERSE LENGTH=320	AT3G09200.1,AT3G09200.2	TAIR10_pep_20101214_contaminants.fasta	34133.4	1	4	7	11	0.0147	0.2
201210Orbi_Dave_Gelsample (1)	Uncategorized Sample	BioSample 1	P14 (F020965)	| Symbols: | Ribosomal protein L10 family protein | chr3:2823364-2825020 REVERSE LENGTH=320	AT3G09200.1,AT3G09200.2	TAIR10_pep_20101214_contaminants.fasta	34133.4	1	5	8	15	0.0211	0.237
201210Orbi_Dave_Gelsample (1)	Uncategorized Sample	BioSample 1	P49 (F020930)	| Symbols: | Ribosomal protein L10 family protein | chr3:2823364-2825020 REVERSE LENGTH=320	AT3G09200.1,AT3G09200.2	TAIR10_pep_20101214_contaminants.fasta	34133.4	0.998	2	2	3	0.0018	0.075
201210Orbi_Dave_Gelsample (1)	Uncategorized Sample	BioSample 1	P50 (F020931)	| Symbols: | Ribosomal protein L10 family protein | chr3:2823364-2825020 REVERSE LENGTH=320	AT3G09200.1,AT3G09200.2	TAIR10_pep_20101214_contaminants.fasta	34133.4	0.998	2	2	3	0.0019	0.075
201210Orbi_Dave_Gelsample (1)	Uncategorized Sample	BioSample 1	P08 (F020969)	| Symbols: PYK10, PSR3.1, BGLU23, LEB | Glycosyl hydrolase superfamily protein | chr3:2840657-2843730 REVERSE LENGTH=524	AT3G09260.1	TAIR10_pep_20101214_contaminants.fasta	59722.4	0.998	2	2	3	0.004	0.0496
201210Orbi_Dave_Gelsample (1)	Uncategorized Sample	BioSample 1	P25 (F020908)	| Symbols: PYK10, PSR3.1, BGLU23, LEB | Glycosyl hydrolase superfamily protein | chr3:2840657-2843730 REVERSE LENGTH=524	AT3G09260.1	TAIR10_pep_20101214_contaminants.fasta	59722.4	1	5	5	7	0.0078	0.124
201210Orbi_Dave_Gelsample (1)	Uncategorized Sample	BioSample 1	P26 (F020909)	| Symbols: PYK10, PSR3.1, BGLU23, LEB | Glycosyl hydrolase superfamily protein | chr3:2840657-2843730 REVERSE LENGTH=524	AT3G09260.1	TAIR10_pep_20101214_contaminants.fasta	59722.4	1	4	4	5	0.0055	0.0916
201210Orbi_Dave_Gelsample (1)	Uncategorized Sample	BioSample 1	P29 (F020912)	| Symbols: PYK10, PSR3.1, BGLU23, LEB | Glycosyl hydrolase superfamily protein | chr3:2840657-2843730 REVERSE LENGTH=524	AT3G09260.1	TAIR10_pep_20101214_contaminants.fasta	59722.4	1	8	11	14	0.0082	0.204
201210Orbi_Dave_Gelsample (1)	Uncategorized Sample	BioSample 1	P32 (F020914)	| Symbols: PYK10, PSR3.1, BGLU23, LEB | Glycosyl hydrolase superfamily protein | chr3:2840657-2843730 REVERSE LENGTH=524	AT3G09260.1	TAIR10_pep_20101214_contaminants.fasta	59722.4	1	2	2	3	0.0022	0.042
201210Orbi_Dave_Gelsample (1)	Uncategorized Sample	BioSample 1	P33 (F020915)	| Symbols: PYK10, PSR3.1, BGLU23, LEB | Glycosyl hydrolase superfamily protein | chr3:2840657-2843730 REVERSE LENGTH=524	AT3G09260.1	TAIR10_pep_20101214_contaminants.fasta	59722.4	0.999	2	2	3	0.0021	0.0573
201210Orbi_Dave_Gelsample (1)	Uncategorized Sample	BioSample 1	P62 (F020943)	| Symbols: PYK10, PSR3.1, BGLU23, LEB | Glycosyl hydrolase superfamily protein | chr3:2840657-2843730 REVERSE LENGTH=524	AT3G09260.1	TAIR10_pep_20101214_contaminants.fasta	59722.4	1	5	6	12	0.0096	0.103
201211Orbi_Dave_Gelsample2	Uncategorized Sample	BioSample 1	S05 (F020981)	| Symbols: PYK10, PSR3.1, BGLU23, LEB | Glycosyl hydrolase superfamily protein | chr3:2840657-2843730 REVERSE LENGTH=524	AT3G09260.1	TAIR10_pep_20101214_contaminants.fasta	59722.4	1	3	3	5	0.00346	0.0592
201211Orbi_Dave_Gelsample2	Uncategorized Sample	BioSample 1	S06 (F020982)	| Symbols: PYK10, PSR3.1, BGLU23, LEB | Glycosyl hydrolase superfamily protein | chr3:2840657-2843730 REVERSE LENGTH=524	AT3G09260.1	TAIR10_pep_20101214_contaminants.fasta	59722.4	1	12	16	48	0.0448	0.25
201211Orbi_Dave_Gelsample2	Uncategorized Sample	BioSample 1	S07 (F020983)	| Symbols: PYK10, PSR3.1, BGLU23, LEB | Glycosyl hydrolase superfamily protein | chr3:2840657-2843730 REVERSE LENGTH=524	AT3G09260.1	TAIR10_pep_20101214_contaminants.fasta	59722.4	1	23	27	123	0.116	0.511
201211Orbi_Dave_Gelsample2	Uncategorized Sample	BioSample 1	S56 (F021053)	| Symbols: PYK10, PSR3.1, BGLU23, LEB | Glycosyl hydrolase superfamily protein | chr3:2840657-2843730 REVERSE LENGTH=524	AT3G09260.1	TAIR10_pep_20101214_contaminants.fasta	59722.4	1	9	10	17	0.0142	0.172
201210Orbi_Dave_Gelsample (1)	Uncategorized Sample	BioSample 1	P34 (F020916)	| Symbols: OMR1 | L-O-methylthreonine resistant 1 | chr3:3099164-3101741 REVERSE LENGTH=592	AT3G10050.1	TAIR10_pep_20101214_contaminants.fasta	64635.1	1	4	4	4	0.0033	0.125
201211Orbi_Dave_Gelsample2	Uncategorized Sample	BioSample 1	S09 (F020985)	| Symbols: OMR1 | L-O-methylthreonine resistant 1 | chr3:3099164-3101741 REVERSE LENGTH=592	AT3G10050.1	TAIR10_pep_20101214_contaminants.fasta	64635.1	1	3	3	3	0.00199	0.0524
201210Orbi_Dave_Gelsample (1)	Uncategorized Sample	BioSample 1	P45 (F020926)	| Symbols: | Thioredoxin superfamily protein | chr3:3672189-3673937 FORWARD LENGTH=266	AT3G11630.1	TAIR10_pep_20101214_contaminants.fasta	29093.1	1	4	4	3	0.0022	0.192
201210Orbi_Dave_Gelsample (1)	Uncategorized Sample	BioSample 1	P61 (F020942)	| Symbols: | Thioredoxin superfamily protein | chr3:3672189-3673937 FORWARD LENGTH=266	AT3G11630.1	TAIR10_pep_20101214_contaminants.fasta	29093.1	1	8	9	16	0.0151	0.41
201211Orbi_Dave_Gelsample2	Uncategorized Sample	BioSample 1	S29 (F021005)	| Symbols: | Thioredoxin superfamily protein | chr3:3672189-3673937 FORWARD LENGTH=266	AT3G11630.1	TAIR10_pep_20101214_contaminants.fasta	29093.1	1	7	7	10	0.00941	0.335
201210Orbi_Dave_Gelsample (1)	Uncategorized Sample	BioSample 1	P29 (F020912)	| Symbols: | TCP-1/cpn60 chaperonin family protein | chr3:3732734-3736156 FORWARD LENGTH=557	AT3G11830.1	TAIR10_pep_20101214_contaminants.fasta	59777.7	1	2	2	14	0.00923	0.181
201210Orbi_Dave_Gelsample (1)	Uncategorized Sample	BioSample 1	P34 (F020916)	| Symbols: | TCP-1/cpn60 chaperonin family protein | chr3:3732734-3736156 FORWARD LENGTH=557	AT3G11830.1	TAIR10_pep_20101214_contaminants.fasta	59777.7	1	15	20	19	0.0116	0.596
201211Orbi_Dave_Gelsample2	Uncategorized Sample	BioSample 1	S08 (F020984)	| Symbols: | TCP-1/cpn60 chaperonin family protein | chr3:3732734-3736156 FORWARD LENGTH=557	AT3G11830.1	TAIR10_pep_20101214_contaminants.fasta	59777.7	1	9	9	4	0.0028	0.275
201211Orbi_Dave_Gelsample2	Uncategorized Sample	BioSample 1	S09 (F020985)	| Symbols: | TCP-1/cpn60 chaperonin family protein | chr3:3732734-3736156 FORWARD LENGTH=557	AT3G11830.1	TAIR10_pep_20101214_contaminants.fasta	59777.7	1	35	44	22	0.0156	0.317
201210Orbi_Dave_Gelsample (1)	Uncategorized Sample	BioSample 1	P62 (F020943)	| Symbols: | Adenine nucleotide alpha hydrolases-like superfamily protein | chr3:3776371-3777393 FORWARD LENGTH=199	AT3G11930.1,AT3G11930.2,AT3G11930.3,AT3G11930.4	TAIR10_pep_20101214_contaminants.fasta	21457.5	1	11	16	56	0.045	0.432
201211Orbi_Dave_Gelsample2	Uncategorized Sample	BioSample 1	S32 (F021014)	| Symbols: | Adenine nucleotide alpha hydrolases-like superfamily protein | chr3:3776371-3777393 FORWARD LENGTH=199	AT3G11930.1,AT3G11930.2,AT3G11930.3,AT3G11930.4	TAIR10_pep_20101214_contaminants.fasta	21457.5	1	3	3	5	0.0033	0.161
201211Orbi_Dave_Gelsample2	Uncategorized Sample	BioSample 1	S38 (F021020)	| Symbols: | Adenine nucleotide alpha hydrolases-like superfamily protein | chr3:3776371-3777393 FORWARD LENGTH=199	AT3G11930.1,AT3G11930.2,AT3G11930.3,AT3G11930.4	TAIR10_pep_20101214_contaminants.fasta	21457.5	1	8	9	24	0.0207	0.337
201210Orbi_Dave_Gelsample (1)	Uncategorized Sample	BioSample 1	P12 (F020877)	| Symbols: PGK1 | phosphoglycerate kinase 1 | chr3:4061127-4063140 REVERSE LENGTH=481	AT3G12780.1	TAIR10_pep_20101214_contaminants.fasta	50113.1	1	5	5	10	0.0073	0.314
201210Orbi_Dave_Gelsample (1)	Uncategorized Sample	BioSample 1	P19 (F020883)	| Symbols: PGK1 | phosphoglycerate kinase 1 | chr3:4061127-4063140 REVERSE LENGTH=481	AT3G12780.1	TAIR10_pep_20101214_contaminants.fasta	50113.1	1	4	4	60	0.0422	0.536
201210Orbi_Dave_Gelsample (1)	Uncategorized Sample	BioSample 1	P30 (F020966)	| Symbols: PGK1 | phosphoglycerate kinase 1 | chr3:4061127-4063140 REVERSE LENGTH=481	AT3G12780.1	TAIR10_pep_20101214_contaminants.fasta	50113.1	1	2	2	7	0.0079	0.202
201210Orbi_Dave_Gelsample (1)	Uncategorized Sample	BioSample 1	P31 (F020913)	| Symbols: PGK1 | phosphoglycerate kinase 1 | chr3:4061127-4063140 REVERSE LENGTH=481	AT3G12780.1	TAIR10_pep_20101214_contaminants.fasta	50113.1	1	11	12	12	0.0154	0.114
201210Orbi_Dave_Gelsample (1)	Uncategorized Sample	BioSample 1	P39 (F020920)	| Symbols: PGK1 | phosphoglycerate kinase 1 | chr3:4061127-4063140 REVERSE LENGTH=481	AT3G12780.1	TAIR10_pep_20101214_contaminants.fasta	50113.1	1	4	4	3	0.0042	0.0665
201210Orbi_Dave_Gelsample (1)	Uncategorized Sample	BioSample 1	P41 (F020922)	| Symbols: PGK1 | phosphoglycerate kinase 1 | chr3:4061127-4063140 REVERSE LENGTH=481	AT3G12780.1	TAIR10_pep_20101214_contaminants.fasta	50113.1	1	20	26	22	0.0149	0.353
201210Orbi_Dave_Gelsample (1)	Uncategorized Sample	BioSample 1	P42 (F020923)	| Symbols: PGK1 | phosphoglycerate kinase 1 | chr3:4061127-4063140 REVERSE LENGTH=481	AT3G12780.1	TAIR10_pep_20101214_contaminants.fasta	50113.1	1	25	37	5	0.0033	0.112
201210Orbi_Dave_Gelsample (1)	Uncategorized Sample	BioSample 1	P43 (F020924)	| Symbols: PGK1 | phosphoglycerate kinase 1 | chr3:4061127-4063140 REVERSE LENGTH=481	AT3G12780.1	TAIR10_pep_20101214_contaminants.fasta	50113.1	1	20	26	49	0.0352	0.642
201210Orbi_Dave_Gelsample (1)	Uncategorized Sample	BioSample 1	P44 (F020925)	| Symbols: PGK1 | phosphoglycerate kinase 1 | chr3:4061127-4063140 REVERSE LENGTH=481	AT3G12780.1	TAIR10_pep_20101214_contaminants.fasta	50113.1	1	24	37	75	0.0582	0.738
201210Orbi_Dave_Gelsample (1)	Uncategorized Sample	BioSample 1	P45 (F020926)	| Symbols: PGK1 | phosphoglycerate kinase 1 | chr3:4061127-4063140 REVERSE LENGTH=481	AT3G12780.1	TAIR10_pep_20101214_contaminants.fasta	50113.1	1	4	5	70	0.0395	0.707
201211Orbi_Dave_Gelsample2	Uncategorized Sample	BioSample 1	S15 (F020991)	| Symbols: PGK1 | phosphoglycerate kinase 1 | chr3:4061127-4063140 REVERSE LENGTH=481	AT3G12780.1	TAIR10_pep_20101214_contaminants.fasta	50113.1	1	3	3	6	0.00715	0.0852
201211Orbi_Dave_Gelsample2	Uncategorized Sample	BioSample 1	S50 (F021047)	| Symbols: PGK1 | phosphoglycerate kinase 1 | chr3:4061127-4063140 REVERSE LENGTH=481	AT3G12780.1	TAIR10_pep_20101214_contaminants.fasta	50113.1	1	30	42	83	0.0528	0.692
201211Orbi_Dave_Gelsample2	Uncategorized Sample	BioSample 1	S51 (F021048)	| Symbols: PGK1 | phosphoglycerate kinase 1 | chr3:4061127-4063140 REVERSE LENGTH=481	AT3G12780.1	TAIR10_pep_20101214_contaminants.fasta	50113.1	1	5	5	9	0.00715	0.175
201211Orbi_Dave_Gelsample2	Uncategorized Sample	BioSample 1	S56 (F021053)	| Symbols: PGK1 | phosphoglycerate kinase 1 | chr3:4061127-4063140 REVERSE LENGTH=481	AT3G12780.1	TAIR10_pep_20101214_contaminants.fasta	50113.1	1	5	5	6	0.00503	0.16
201210Orbi_Dave_Gelsample (1)	Uncategorized Sample	BioSample 1	P33 (F020915)	| Symbols: | Subtilase family protein | chr3:4658421-4660754 REVERSE LENGTH=777	AT3G14067.1	TAIR10_pep_20101214_contaminants.fasta	81817.3	1	3	3	3	0.0021	0.0566
201210Orbi_Dave_Gelsample (1)	Uncategorized Sample	BioSample 1	P34 (F020916)	| Symbols: | Subtilase family protein | chr3:4658421-4660754 REVERSE LENGTH=777	AT3G14067.1	TAIR10_pep_20101214_contaminants.fasta	81817.3	1	3	3	4	0.0033	0.0528
201211Orbi_Dave_Gelsample2	Uncategorized Sample	BioSample 1	S08 (F020984)	| Symbols: | Subtilase family protein | chr3:4658421-4660754 REVERSE LENGTH=777	AT3G14067.1	TAIR10_pep_20101214_contaminants.fasta	81817.3	1	3	3	5	0.0033	0.0515
201211Orbi_Dave_Gelsample2	Uncategorized Sample	BioSample 1	S09 (F020985)	| Symbols: | Subtilase family protein | chr3:4658421-4660754 REVERSE LENGTH=777	AT3G14067.1	TAIR10_pep_20101214_contaminants.fasta	81817.3	1	3	3	5	0.00331	0.0669
201210Orbi_Dave_Gelsample (1)	Uncategorized Sample	BioSample 1	P25 (F020908)	| Symbols: | Aldolase-type TIM barrel family protein | chr3:4818667-4820748 FORWARD LENGTH=367	AT3G14415.1,AT3G14415.2,AT3G14415.3	TAIR10_pep_20101214_contaminants.fasta	40307.7	0.998	2	2	3	0.0033	0.0763
201210Orbi_Dave_Gelsample (1)	Uncategorized Sample	BioSample 1	P67 (F020948)	| Symbols: | Aldolase-type TIM barrel family protein | chr3:4818667-4820748 FORWARD LENGTH=367	AT3G14415.1,AT3G14415.2,AT3G14415.3	TAIR10_pep_20101214_contaminants.fasta	40307.7	1	3	3	5	0.0059	0.079
201211Orbi_Dave_Gelsample2	Uncategorized Sample	BioSample 1	S31 (F021013)	| Symbols: | Aldolase-type TIM barrel family protein | chr3:4821804-4823899 FORWARD LENGTH=367	AT3G14420.1,AT3G14420.2,AT3G14420.4,AT3G14420.5,AT3G14420.6	TAIR10_pep_20101214_contaminants.fasta	40342.7	1	5	5	7	0.00538	0.112
201210Orbi_Dave_Gelsample (1)	Uncategorized Sample	BioSample 1	P20 (F020885)	| Symbols: PLDALPHA1, PLD | phospholipase D alpha 1 | chr3:5330835-5333474 FORWARD LENGTH=810	AT3G15730.1	TAIR10_pep_20101214_contaminants.fasta	91850.6	1	14	16	28	0.0219	0.231
201210Orbi_Dave_Gelsample (1)	Uncategorized Sample	BioSample 1	P21 (F020886)	| Symbols: PLDALPHA1, PLD | phospholipase D alpha 1 | chr3:5330835-5333474 FORWARD LENGTH=810	AT3G15730.1	TAIR10_pep_20101214_contaminants.fasta	91850.6	1	2	2	3	0.0024	0.0321
201210Orbi_Dave_Gelsample (1)	Uncategorized Sample	BioSample 1	P22 (F020887)	| Symbols: PLDALPHA1, PLD | phospholipase D alpha 1 | chr3:5330835-5333474 FORWARD LENGTH=810	AT3G15730.1	TAIR10_pep_20101214_contaminants.fasta	91850.6	1	3	3	4	0.0035	0.0346
201211Orbi_Dave_Gelsample2	Uncategorized Sample	BioSample 1	S01 (F020977)	| Symbols: PLDALPHA1, PLD | phospholipase D alpha 1 | chr3:5330835-5333474 FORWARD LENGTH=810	AT3G15730.1	TAIR10_pep_20101214_contaminants.fasta	91850.6	1	3	3	7	0.0082	0.063
201211Orbi_Dave_Gelsample2	Uncategorized Sample	BioSample 1	S02 (F020978)	| Symbols: PLDALPHA1, PLD | phospholipase D alpha 1 | chr3:5330835-5333474 FORWARD LENGTH=810	AT3G15730.1	TAIR10_pep_20101214_contaminants.fasta	91850.6	1	14	18	35	0.0303	0.23
201211Orbi_Dave_Gelsample2	Uncategorized Sample	BioSample 1	S03 (F020979)	| Symbols: PLDALPHA1, PLD | phospholipase D alpha 1 | chr3:5330835-5333474 FORWARD LENGTH=810	AT3G15730.1	TAIR10_pep_20101214_contaminants.fasta	91850.6	1	8	8	16	0.0114	0.127
201210Orbi_Dave_Gelsample (1)	Uncategorized Sample	BioSample 1	P05 (F020904)	| Symbols: ATMLP-470, NSP1, ATNSP1 | nitrile specifier protein 1 | chr3:5566516-5568330 FORWARD LENGTH=470	AT3G16400.1,AT3G16400.2	TAIR10_pep_20101214_contaminants.fasta	51669.5	1	10	11	16	0.0125	0.264
201210Orbi_Dave_Gelsample (1)	Uncategorized Sample	BioSample 1	P06 (F020905)	| Symbols: ATMLP-470, NSP1, ATNSP1 | nitrile specifier protein 1 | chr3:5566516-5568330 FORWARD LENGTH=470	AT3G16400.1,AT3G16400.2	TAIR10_pep_20101214_contaminants.fasta	51669.5	0.998	2	2	3	0.002	0.0489
201210Orbi_Dave_Gelsample (1)	Uncategorized Sample	BioSample 1	P10 (F020875)	| Symbols: ATMLP-470, NSP1, ATNSP1 | nitrile specifier protein 1 | chr3:5566516-5568330 FORWARD LENGTH=470	AT3G16400.1,AT3G16400.2	TAIR10_pep_20101214_contaminants.fasta	51669.5	1	14	16	22	0.0134	0.362
201210Orbi_Dave_Gelsample (1)	Uncategorized Sample	BioSample 1	P11 (F020876)	| Symbols: ATMLP-470, NSP1, ATNSP1 | nitrile specifier protein 1 | chr3:5566516-5568330 FORWARD LENGTH=470	AT3G16400.1,AT3G16400.2	TAIR10_pep_20101214_contaminants.fasta	51669.5	1	6	7	12	0.0077	0.164
201210Orbi_Dave_Gelsample (1)	Uncategorized Sample	BioSample 1	P36 (F020967)	| Symbols: ATMLP-470, NSP1, ATNSP1 | nitrile specifier protein 1 | chr3:5566516-5568330 FORWARD LENGTH=470	AT3G16400.1,AT3G16400.2	TAIR10_pep_20101214_contaminants.fasta	51669.5	1	6	7	13	0.0207	0.189
201210Orbi_Dave_Gelsample (1)	Uncategorized Sample	BioSample 1	P51 (F020932)	| Symbols: ATMLP-470, NSP1, ATNSP1 | nitrile specifier protein 1 | chr3:5566516-5568330 FORWARD LENGTH=470	AT3G16400.1,AT3G16400.2	TAIR10_pep_20101214_contaminants.fasta	51669.5	1	2	2	3	0.0023	0.0404
201211Orbi_Dave_Gelsample2	Uncategorized Sample	BioSample 1	S03 (F020979)	| Symbols: ATMLP-470, NSP1, ATNSP1 | nitrile specifier protein 1 | chr3:5566516-5568330 FORWARD LENGTH=470	AT3G16400.1,AT3G16400.2	TAIR10_pep_20101214_contaminants.fasta	51669.5	1	3	3	4	0.00285	0.0723
201211Orbi_Dave_Gelsample2	Uncategorized Sample	BioSample 1	S56 (F021053)	| Symbols: ATMLP-470, NSP1, ATNSP1 | nitrile specifier protein 1 | chr3:5566516-5568330 FORWARD LENGTH=470	AT3G16400.1,AT3G16400.2	TAIR10_pep_20101214_contaminants.fasta	51669.5	1	4	4	5	0.00419	0.1
201210Orbi_Dave_Gelsample (1)	Uncategorized Sample	BioSample 1	P53 (F020934)	| Symbols: JAL31 | jacalin-related lectin 31 | chr3:5581830-5582959 FORWARD LENGTH=296	AT3G16430.1,AT3G16430.2	TAIR10_pep_20101214_contaminants.fasta	32234	0.998	2	2	2	0.0013	0.193
201210Orbi_Dave_Gelsample (1)	Uncategorized Sample	BioSample 1	P54 (F020935)	| Symbols: JAL31 | jacalin-related lectin 31 | chr3:5581830-5582959 FORWARD LENGTH=296	AT3G16430.1,AT3G16430.2	TAIR10_pep_20101214_contaminants.fasta	32234	0.999	2	2	3	0.0024	0.213
201211Orbi_Dave_Gelsample2	Uncategorized Sample	BioSample 1	S20 (F020996)	| Symbols: JAL31 | jacalin-related lectin 31 | chr3:5581830-5582959 FORWARD LENGTH=296	AT3G16430.1,AT3G16430.2	TAIR10_pep_20101214_contaminants.fasta	32234	1	15	22	36	0.0273	0.524
201210Orbi_Dave_Gelsample (1)	Uncategorized Sample	BioSample 1	P51 (F020932)	| Symbols: | Mannose-binding lectin superfamily protein | chr3:5588593-5589792 FORWARD LENGTH=300	AT3G16450.1,AT3G16450.2,AT3G16450.3	TAIR10_pep_20101214_contaminants.fasta	32022.7	1	13	17	5	0.0028	0.0766
201210Orbi_Dave_Gelsample (1)	Uncategorized Sample	BioSample 1	P22 (F020887)	| Symbols: | Mannose-binding lectin superfamily protein | chr3:5593029-5595522 FORWARD LENGTH=705	AT3G16460.1,AT3G16460.2	TAIR10_pep_20101214_contaminants.fasta	72473.6	1	4	4	34	0.0265	0.53
201210Orbi_Dave_Gelsample (1)	Uncategorized Sample	BioSample 1	P40 (F020921)	| Symbols: | Mannose-binding lectin superfamily protein | chr3:5593029-5595522 FORWARD LENGTH=705	AT3G16460.1,AT3G16460.2	TAIR10_pep_20101214_contaminants.fasta	72473.6	1	3	4	7	0.0062	0.108
201211Orbi_Dave_Gelsample2	Uncategorized Sample	BioSample 1	S04 (F020980)	| Symbols: | Mannose-binding lectin superfamily protein | chr3:5593029-5595522 FORWARD LENGTH=705	AT3G16460.1,AT3G16460.2	TAIR10_pep_20101214_contaminants.fasta	72473.6	1	28	41	93	0.06	0.477
201210Orbi_Dave_Gelsample (1)	Uncategorized Sample	BioSample 1	P42 (F020923)	| Symbols: CAD4, ATCAD4, CAD, CAD-C | GroES-like zinc-binding alcohol dehydrogenase family protein | chr3:6744859-6747005 FORWARD LENGTH=365	AT3G19450.1	TAIR10_pep_20101214_contaminants.fasta	39097.6	1	3	3	3	0.0023	0.0959
201210Orbi_Dave_Gelsample (1)	Uncategorized Sample	BioSample 1	P43 (F020924)	| Symbols: CAD4, ATCAD4, CAD, CAD-C | GroES-like zinc-binding alcohol dehydrogenase family protein | chr3:6744859-6747005 FORWARD LENGTH=365	AT3G19450.1	TAIR10_pep_20101214_contaminants.fasta	39097.6	1	17	20	42	0.022	0.647
201210Orbi_Dave_Gelsample (1)	Uncategorized Sample	BioSample 1	P44 (F020925)	| Symbols: CAD4, ATCAD4, CAD, CAD-C | GroES-like zinc-binding alcohol dehydrogenase family protein | chr3:6744859-6747005 FORWARD LENGTH=365	AT3G19450.1	TAIR10_pep_20101214_contaminants.fasta	39097.6	1	16	23	54	0.0305	0.575
201211Orbi_Dave_Gelsample2	Uncategorized Sample	BioSample 1	S50 (F021047)	| Symbols: CAD4, ATCAD4, CAD, CAD-C | GroES-like zinc-binding alcohol dehydrogenase family protein | chr3:6744859-6747005 FORWARD LENGTH=365	AT3G19450.1	TAIR10_pep_20101214_contaminants.fasta	39097.6	1	4	4	5	0.00318	0.121
201210Orbi_Dave_Gelsample (1)	Uncategorized Sample	BioSample 1	P34 (F020916)	| Symbols: | D-3-phosphoglycerate dehydrogenase | chr3:6752590-6754650 FORWARD LENGTH=588	AT3G19480.1	TAIR10_pep_20101214_contaminants.fasta	62122.2	1	11	14	23	0.019	0.289
201210Orbi_Dave_Gelsample (1)	Uncategorized Sample	BioSample 1	P35 (F020917)	| Symbols: | D-3-phosphoglycerate dehydrogenase | chr3:6752590-6754650 FORWARD LENGTH=588	AT3G19480.1	TAIR10_pep_20101214_contaminants.fasta	62122.2	0.998	2	2	3	0.0028	0.0323
201211Orbi_Dave_Gelsample2	Uncategorized Sample	BioSample 1	S05 (F020981)	| Symbols: | D-3-phosphoglycerate dehydrogenase | chr3:6752590-6754650 FORWARD LENGTH=588	AT3G19480.1	TAIR10_pep_20101214_contaminants.fasta	62122.2	1	3	3	4	0.00276	0.0629
201211Orbi_Dave_Gelsample2	Uncategorized Sample	BioSample 1	S09 (F020985)	| Symbols: | D-3-phosphoglycerate dehydrogenase | chr3:6752590-6754650 FORWARD LENGTH=588	AT3G19480.1	TAIR10_pep_20101214_contaminants.fasta	62122.2	1	2	2	2	0.00132	0.0663
201210Orbi_Dave_Gelsample (1)	Uncategorized Sample	BioSample 1	P47 (F020928)	| Symbols: TOM40 | translocase of the outer mitochondrial membrane 40 | chr3:6967685-6970247 FORWARD LENGTH=309	AT3G20000.1	TAIR10_pep_20101214_contaminants.fasta	34251.2	1	6	6	8	0.0053	0.311
201211Orbi_Dave_Gelsample2	Uncategorized Sample	BioSample 1	S17 (F020993)	| Symbols: TOM40 | translocase of the outer mitochondrial membrane 40 | chr3:6967685-6970247 FORWARD LENGTH=309	AT3G20000.1	TAIR10_pep_20101214_contaminants.fasta	34251.2	1	7	7	12	0.00845	0.246
201210Orbi_Dave_Gelsample (1)	Uncategorized Sample	BioSample 1	P32 (F020914)	| Symbols: ATTCP-1, TCP-1 | T-complex protein 1 alpha subunit | chr3:6998544-7002266 REVERSE LENGTH=545	AT3G20050.1	TAIR10_pep_20101214_contaminants.fasta	59230.5	1	6	6	6	0.0044	0.123
201210Orbi_Dave_Gelsample (1)	Uncategorized Sample	BioSample 1	P34 (F020916)	| Symbols: ATTCP-1, TCP-1 | T-complex protein 1 alpha subunit | chr3:6998544-7002266 REVERSE LENGTH=545	AT3G20050.1	TAIR10_pep_20101214_contaminants.fasta	59230.5	1	14	18	30	0.0247	0.374
201211Orbi_Dave_Gelsample2	Uncategorized Sample	BioSample 1	S08 (F020984)	| Symbols: ATTCP-1, TCP-1 | T-complex protein 1 alpha subunit | chr3:6998544-7002266 REVERSE LENGTH=545	AT3G20050.1	TAIR10_pep_20101214_contaminants.fasta	59230.5	1	32	40	99	0.0653	0.661
201211Orbi_Dave_Gelsample2	Uncategorized Sample	BioSample 1	S09 (F020985)	| Symbols: ATTCP-1, TCP-1 | T-complex protein 1 alpha subunit | chr3:6998544-7002266 REVERSE LENGTH=545	AT3G20050.1	TAIR10_pep_20101214_contaminants.fasta	59230.5	1	16	16	27	0.0179	0.365
201211Orbi_Dave_Gelsample2	Uncategorized Sample	BioSample 1	S56 (F021053)	| Symbols: ATTCP-1, TCP-1 | T-complex protein 1 alpha subunit | chr3:6998544-7002266 REVERSE LENGTH=545	AT3G20050.1	TAIR10_pep_20101214_contaminants.fasta	59230.5	1	3	3	5	0.00419	0.055
201210Orbi_Dave_Gelsample (1)	Uncategorized Sample	BioSample 1	P73 (F020954)	| Symbols: | endoribonuclease L-PSP family protein | chr3:7110227-7111695 REVERSE LENGTH=187	AT3G20390.1	TAIR10_pep_20101214_contaminants.fasta	19816.2	1	5	5	10	0.0111	0.342
201210Orbi_Dave_Gelsample (1)	Uncategorized Sample	BioSample 1	P75 (F020956)	| Symbols: | endoribonuclease L-PSP family protein | chr3:7110227-7111695 REVERSE LENGTH=187	AT3G20390.1	TAIR10_pep_20101214_contaminants.fasta	19816.2	1	12	16	50	0.0495	0.658
201211Orbi_Dave_Gelsample2	Uncategorized Sample	BioSample 1	S54 (F021051)	| Symbols: | endoribonuclease L-PSP family protein | chr3:7110227-7111695 REVERSE LENGTH=187	AT3G20390.1	TAIR10_pep_20101214_contaminants.fasta	19816.2	1	10	12	31	0.0338	0.556
201210Orbi_Dave_Gelsample (1)	Uncategorized Sample	BioSample 1	P51 (F020932)	| Symbols: FIB4 | Plastid-lipid associated protein PAP / fibrillin family protein | chr3:8376636-8378225 REVERSE LENGTH=284	AT3G23400.1	TAIR10_pep_20101214_contaminants.fasta	30456	1	7	7	12	0.0094	0.271
201210Orbi_Dave_Gelsample (1)	Uncategorized Sample	BioSample 1	P56 (F020937)	| Symbols: FIB4 | Plastid-lipid associated protein PAP / fibrillin family protein | chr3:8376636-8378225 REVERSE LENGTH=284	AT3G23400.1	TAIR10_pep_20101214_contaminants.fasta	30456	1	2	2	2	0.0017	0.0739
201211Orbi_Dave_Gelsample2	Uncategorized Sample	BioSample 1	S22 (F020998)	| Symbols: FIB4 | Plastid-lipid associated protein PAP / fibrillin family protein | chr3:8376636-8378225 REVERSE LENGTH=284	AT3G23400.1	TAIR10_pep_20101214_contaminants.fasta	30456	1	11	11	23	0.0178	0.437
201211Orbi_Dave_Gelsample2	Uncategorized Sample	BioSample 1	S23 (F020999)	| Symbols: FIB4 | Plastid-lipid associated protein PAP / fibrillin family protein | chr3:8376636-8378225 REVERSE LENGTH=284	AT3G23400.1	TAIR10_pep_20101214_contaminants.fasta	30456	1	12	16	56	0.0419	0.461
201211Orbi_Dave_Gelsample2	Uncategorized Sample	BioSample 1	S25 (F021001)	| Symbols: FIB4 | Plastid-lipid associated protein PAP / fibrillin family protein | chr3:8376636-8378225 REVERSE LENGTH=284	AT3G23400.1	TAIR10_pep_20101214_contaminants.fasta	30456	1	4	4	7	0.00463	0.151
201211Orbi_Dave_Gelsample2	Uncategorized Sample	BioSample 1	S50 (F021047)	| Symbols: FIB4 | Plastid-lipid associated protein PAP / fibrillin family protein | chr3:8376636-8378225 REVERSE LENGTH=284	AT3G23400.1	TAIR10_pep_20101214_contaminants.fasta	30456	1	8	8	14	0.0089	0.352
201211Orbi_Dave_Gelsample2	Uncategorized Sample	BioSample 1	S53 (F021050)	| Symbols: FIB4 | Plastid-lipid associated protein PAP / fibrillin family protein | chr3:8376636-8378225 REVERSE LENGTH=284	AT3G23400.1	TAIR10_pep_20101214_contaminants.fasta	30456	1	10	10	20	0.0147	0.465
201210Orbi_Dave_Gelsample (1)	Uncategorized Sample	BioSample 1	P15 (F020879)	| Symbols: | alpha/beta-Hydrolases superfamily protein | chr3:8473833-8475655 FORWARD LENGTH=239	AT3G23600.1,AT3G23600.2	TAIR10_pep_20101214_contaminants.fasta	25861.7	1	6	8	15	0.0111	0.402
201210Orbi_Dave_Gelsample (1)	Uncategorized Sample	BioSample 1	P16 (F020880)	| Symbols: | alpha/beta-Hydrolases superfamily protein | chr3:8473833-8475655 FORWARD LENGTH=239	AT3G23600.1,AT3G23600.2	TAIR10_pep_20101214_contaminants.fasta	25861.7	0.998	2	2	3	0.0029	0.126
201211Orbi_Dave_Gelsample2	Uncategorized Sample	BioSample 1	S27 (F021003)	| Symbols: | alpha/beta-Hydrolases superfamily protein | chr3:8473833-8475655 FORWARD LENGTH=239	AT3G23600.1,AT3G23600.2	TAIR10_pep_20101214_contaminants.fasta	25861.7	1	3	3	5	0.00398	0.159
201210Orbi_Dave_Gelsample (1)	Uncategorized Sample	BioSample 1	P10 (F020875)	| Symbols: | dehydratase family | chr3:8648780-8652323 FORWARD LENGTH=608	AT3G23940.1,AT3G23940.2	TAIR10_pep_20101214_contaminants.fasta	64915.7	1	11	12	33	0.0201	0.212
201210Orbi_Dave_Gelsample (1)	Uncategorized Sample	BioSample 1	P36 (F020967)	| Symbols: | dehydratase family | chr3:8648780-8652323 FORWARD LENGTH=608	AT3G23940.1,AT3G23940.2	TAIR10_pep_20101214_contaminants.fasta	64915.7	0.998	2	2	4	0.0064	0.0609
201211Orbi_Dave_Gelsample2	Uncategorized Sample	BioSample 1	S01 (F020977)	| Symbols: | dehydratase family | chr3:8648780-8652323 FORWARD LENGTH=608	AT3G23940.1,AT3G23940.2	TAIR10_pep_20101214_contaminants.fasta	64915.7	1	2	2	2	0.00234	0.0329
201210Orbi_Dave_Gelsample (1)	Uncategorized Sample	BioSample 1	P37 (F020918)	| Symbols: ATGR1, GR1 | glutathione-disulfide reductase | chr3:8729762-8734115 REVERSE LENGTH=499	AT3G24170.1,AT3G24170.2,AT3G24170.3	TAIR10_pep_20101214_contaminants.fasta	53871.4	1	10	13	24	0.0175	0.285
201211Orbi_Dave_Gelsample2	Uncategorized Sample	BioSample 1	S57 (F021054)	| Symbols: ATGR1, GR1 | glutathione-disulfide reductase | chr3:8729762-8734115 REVERSE LENGTH=499	AT3G24170.1,AT3G24170.2,AT3G24170.3	TAIR10_pep_20101214_contaminants.fasta	53871.4	1	10	10	15	0.00957	0.204
201210Orbi_Dave_Gelsample (1)	Uncategorized Sample	BioSample 1	P62 (F020943)	| Symbols: AOC2 | allene oxide cyclase 2 | chr3:9406975-9407839 FORWARD LENGTH=253	AT3G25770.1	TAIR10_pep_20101214_contaminants.fasta	27636.5	1	12	18	4	0.00345	0.307
201211Orbi_Dave_Gelsample2	Uncategorized Sample	BioSample 1	S01 (F020977)	| Symbols: AOC2 | allene oxide cyclase 2 | chr3:9406975-9407839 FORWARD LENGTH=253	AT3G25770.1	TAIR10_pep_20101214_contaminants.fasta	27636.5	0.999	2	2	41	0.0329	0.478
201211Orbi_Dave_Gelsample2	Uncategorized Sample	BioSample 1	S34 (F021016)	| Symbols: AOC2 | allene oxide cyclase 2 | chr3:9406975-9407839 FORWARD LENGTH=253	AT3G25770.1	TAIR10_pep_20101214_contaminants.fasta	27636.5	1	6	6	5	0.00585	0.0909
201211Orbi_Dave_Gelsample2	Uncategorized Sample	BioSample 1	S38 (F021020)	| Symbols: AOC2 | allene oxide cyclase 2 | chr3:9406975-9407839 FORWARD LENGTH=253	AT3G25770.1	TAIR10_pep_20101214_contaminants.fasta	27636.5	1	10	13	29	0.025	0.395
201210Orbi_Dave_Gelsample (1)	Uncategorized Sample	BioSample 1	P25 (F020908)	| Symbols: GAPA, GAPA-1 | glyceraldehyde 3-phosphate dehydrogenase A subunit | chr3:9795226-9796848 FORWARD LENGTH=396	AT3G26650.1	TAIR10_pep_20101214_contaminants.fasta	42490.1	1	3	3	3	0.0033	0.141
201210Orbi_Dave_Gelsample (1)	Uncategorized Sample	BioSample 1	P43 (F020924)	| Symbols: GAPA, GAPA-1 | glyceraldehyde 3-phosphate dehydrogenase A subunit | chr3:9795226-9796848 FORWARD LENGTH=396	AT3G26650.1	TAIR10_pep_20101214_contaminants.fasta	42490.1	0.998	2	2	2	0.0011	0.106
201210Orbi_Dave_Gelsample (1)	Uncategorized Sample	BioSample 1	P45 (F020926)	| Symbols: GAPA, GAPA-1 | glyceraldehyde 3-phosphate dehydrogenase A subunit | chr3:9795226-9796848 FORWARD LENGTH=396	AT3G26650.1	TAIR10_pep_20101214_contaminants.fasta	42490.1	1	3	3	4	0.0029	0.162
201210Orbi_Dave_Gelsample (1)	Uncategorized Sample	BioSample 1	P47 (F020928)	| Symbols: GAPA, GAPA-1 | glyceraldehyde 3-phosphate dehydrogenase A subunit | chr3:9795226-9796848 FORWARD LENGTH=396	AT3G26650.1	TAIR10_pep_20101214_contaminants.fasta	42490.1	0.998	2	2	2	0.0013	0.0606
201210Orbi_Dave_Gelsample (1)	Uncategorized Sample	BioSample 1	P49 (F020930)	| Symbols: GAPA, GAPA-1 | glyceraldehyde 3-phosphate dehydrogenase A subunit | chr3:9795226-9796848 FORWARD LENGTH=396	AT3G26650.1	TAIR10_pep_20101214_contaminants.fasta	42490.1	1	3	3	3	0.0018	0.169
201211Orbi_Dave_Gelsample2	Uncategorized Sample	BioSample 1	S10 (F020986)	| Symbols: GAPA, GAPA-1 | glyceraldehyde 3-phosphate dehydrogenase A subunit | chr3:9795226-9796848 FORWARD LENGTH=396	AT3G26650.1	TAIR10_pep_20101214_contaminants.fasta	42490.1	1	3	3	5	0.00379	0.149
201211Orbi_Dave_Gelsample2	Uncategorized Sample	BioSample 1	S12 (F020988)	| Symbols: GAPA, GAPA-1 | glyceraldehyde 3-phosphate dehydrogenase A subunit | chr3:9795226-9796848 FORWARD LENGTH=396	AT3G26650.1	TAIR10_pep_20101214_contaminants.fasta	42490.1	1	10	11	23	0.0159	0.371
201211Orbi_Dave_Gelsample2	Uncategorized Sample	BioSample 1	S52 (F021049)	| Symbols: GAPA, GAPA-1 | glyceraldehyde 3-phosphate dehydrogenase A subunit | chr3:9795226-9796848 FORWARD LENGTH=396	AT3G26650.1	TAIR10_pep_20101214_contaminants.fasta	42490.1	1	6	6	9	0.0056	0.237
201210Orbi_Dave_Gelsample (1)	Uncategorized Sample	BioSample 1	P48 (F020929)	| Symbols: DEGP1, Deg1 | DegP protease 1 | chr3:10366659-10368864 REVERSE LENGTH=439	AT3G27925.1	TAIR10_pep_20101214_contaminants.fasta	46674.8	1	8	10	15	0.0112	0.237
201210Orbi_Dave_Gelsample (1)	Uncategorized Sample	BioSample 1	P59 (F020940)	| Symbols: DEGP1, Deg1 | DegP protease 1 | chr3:10366659-10368864 REVERSE LENGTH=439	AT3G27925.1	TAIR10_pep_20101214_contaminants.fasta	46674.8	1	3	4	5	0.0045	0.0979
201211Orbi_Dave_Gelsample2	Uncategorized Sample	BioSample 1	S14 (F020990)	| Symbols: DEGP1, Deg1 | DegP protease 1 | chr3:10366659-10368864 REVERSE LENGTH=439	AT3G27925.1	TAIR10_pep_20101214_contaminants.fasta	46674.8	1	7	7	10	0.00753	0.196
201210Orbi_Dave_Gelsample (1)	Uncategorized Sample	BioSample 1	P45 (F020926)	| Symbols: | ATPase, V0/A0 complex, subunit C/D | chr3:10773144-10775594 REVERSE LENGTH=351	AT3G28710.1	TAIR10_pep_20101214_contaminants.fasta	40793	1	7	7	9	0.0066	0.262
201211Orbi_Dave_Gelsample2	Uncategorized Sample	BioSample 1	S50 (F021047)	| Symbols: | ATPase, V0/A0 complex, subunit C/D | chr3:10778025-10780350 FORWARD LENGTH=351	AT3G28715.1	TAIR10_pep_20101214_contaminants.fasta	40788.9	1	8	9	14	0.0089	0.293
201210Orbi_Dave_Gelsample (1)	Uncategorized Sample	BioSample 1	P47 (F020928)	| Symbols: | Protein of unknown function (DUF1350) | chr3:15430770-15433035 FORWARD LENGTH=373	AT3G43540.1	TAIR10_pep_20101214_contaminants.fasta	40980.1	1	7	8	11	0.0073	0.316
201211Orbi_Dave_Gelsample2	Uncategorized Sample	BioSample 1	S17 (F020993)	| Symbols: | Protein of unknown function (DUF1350) | chr3:15430770-15433035 FORWARD LENGTH=373	AT3G43540.1,AT3G43540.2	TAIR10_pep_20101214_contaminants.fasta	40980.1	1	3	3	5	0.00352	0.105
201210Orbi_Dave_Gelsample (1)	Uncategorized Sample	BioSample 1	P24 (F020889)	| Symbols: NIT1, ATNIT1, NITI | nitrilase 1 | chr3:15986901-15988841 FORWARD LENGTH=346	AT3G44310.1,AT3G44310.3	TAIR10_pep_20101214_contaminants.fasta	38152.3	1	3	3	6	0.0074	0.104
201210Orbi_Dave_Gelsample (1)	Uncategorized Sample	BioSample 1	P32 (F020914)	| Symbols: NIT1, ATNIT1, NITI | nitrilase 1 | chr3:15986901-15988841 FORWARD LENGTH=346	AT3G44310.1,AT3G44310.3	TAIR10_pep_20101214_contaminants.fasta	38152.3	1	6	8	11	0.008	0.243
201210Orbi_Dave_Gelsample (1)	Uncategorized Sample	BioSample 1	P47 (F020928)	| Symbols: NIT1, ATNIT1, NITI | nitrilase 1 | chr3:15986901-15988841 FORWARD LENGTH=346	AT3G44310.1,AT3G44310.3	TAIR10_pep_20101214_contaminants.fasta	38152.3	1	17	25	39	0.026	0.445
201210Orbi_Dave_Gelsample (1)	Uncategorized Sample	BioSample 1	P48 (F020929)	| Symbols: NIT1, ATNIT1, NITI | nitrilase 1 | chr3:15986901-15988841 FORWARD LENGTH=346	AT3G44310.1,AT3G44310.3	TAIR10_pep_20101214_contaminants.fasta	38152.3	1	4	4	5	0.0037	0.145
201211Orbi_Dave_Gelsample2	Uncategorized Sample	BioSample 1	S13 (F020989)	| Symbols: NIT1, ATNIT1, NITI | nitrilase 1 | chr3:15986901-15988841 FORWARD LENGTH=346	AT3G44310.1,AT3G44310.3	TAIR10_pep_20101214_contaminants.fasta	38152.3	1	7	8	19	0.0129	0.223
201211Orbi_Dave_Gelsample2	Uncategorized Sample	BioSample 1	S14 (F020990)	| Symbols: NIT1, ATNIT1, NITI | nitrilase 1 | chr3:15986901-15988841 FORWARD LENGTH=346	AT3G44310.1,AT3G44310.3	TAIR10_pep_20101214_contaminants.fasta	38152.3	1	7	7	13	0.00979	0.263
201211Orbi_Dave_Gelsample2	Uncategorized Sample	BioSample 1	S17 (F020993)	| Symbols: NIT1, ATNIT1, NITI | nitrilase 1 | chr3:15986901-15988841 FORWARD LENGTH=346	AT3G44310.1,AT3G44310.3	TAIR10_pep_20101214_contaminants.fasta	38152.3	1	4	4	5	0.00352	0.147
201211Orbi_Dave_Gelsample2	Uncategorized Sample	BioSample 1	S55 (F021052)	| Symbols: NIT1, ATNIT1, NITI | nitrilase 1 | chr3:15986901-15988841 FORWARD LENGTH=346	AT3G44310.1,AT3G44310.3	TAIR10_pep_20101214_contaminants.fasta	38152.3	1	5	5	8	0.00538	0.156
201210Orbi_Dave_Gelsample (1)	Uncategorized Sample	BioSample 1	P19 (F020883)	| Symbols: LOX2, ATLOX2 | lipoxygenase 2 | chr3:16525437-16529233 FORWARD LENGTH=896	AT3G45140.1	TAIR10_pep_20101214_contaminants.fasta	102049	1	20	22	63	0.0809	0.257
201210Orbi_Dave_Gelsample (1)	Uncategorized Sample	BioSample 1	P21 (F020886)	| Symbols: LOX2, ATLOX2 | lipoxygenase 2 | chr3:16525437-16529233 FORWARD LENGTH=896	AT3G45140.1	TAIR10_pep_20101214_contaminants.fasta	102049	1	44	58	141	0.111	0.474
201210Orbi_Dave_Gelsample (1)	Uncategorized Sample	BioSample 1	P27 (F020910)	| Symbols: LOX2, ATLOX2 | lipoxygenase 2 | chr3:16525437-16529233 FORWARD LENGTH=896	AT3G45140.1	TAIR10_pep_20101214_contaminants.fasta	102049	1	28	35	66	0.044	0.392
201211Orbi_Dave_Gelsample2	Uncategorized Sample	BioSample 1	S03 (F020979)	| Symbols: LOX2, ATLOX2 | lipoxygenase 2 | chr3:16525437-16529233 FORWARD LENGTH=896	AT3G45140.1	TAIR10_pep_20101214_contaminants.fasta	102049	1	7	7	10	0.00712	0.0781
201210Orbi_Dave_Gelsample (1)	Uncategorized Sample	BioSample 1	P37 (F020918)	| Symbols: PTAC16 | plastid transcriptionally active 16 | chr3:17228766-17231021 FORWARD LENGTH=510	AT3G46780.1	TAIR10_pep_20101214_contaminants.fasta	54358.6	1	16	21	4	0.0031	0.0824
201210Orbi_Dave_Gelsample (1)	Uncategorized Sample	BioSample 1	P42 (F020923)	| Symbols: PTAC16 | plastid transcriptionally active 16 | chr3:17228766-17231021 FORWARD LENGTH=510	AT3G46780.1	TAIR10_pep_20101214_contaminants.fasta	54358.6	1	3	3	20	0.0128	0.255
201210Orbi_Dave_Gelsample (1)	Uncategorized Sample	BioSample 1	P45 (F020926)	| Symbols: PTAC16 | plastid transcriptionally active 16 | chr3:17228766-17231021 FORWARD LENGTH=510	AT3G46780.1	TAIR10_pep_20101214_contaminants.fasta	54358.6	1	3	3	2	0.0013	0.0586
201211Orbi_Dave_Gelsample2	Uncategorized Sample	BioSample 1	S50 (F021047)	| Symbols: PTAC16 | plastid transcriptionally active 16 | chr3:17228766-17231021 FORWARD LENGTH=510	AT3G46780.1	TAIR10_pep_20101214_contaminants.fasta	54358.6	1	4	4	105	0.0796	0.603
201211Orbi_Dave_Gelsample2	Uncategorized Sample	BioSample 1	S57 (F021054)	| Symbols: PTAC16 | plastid transcriptionally active 16 | chr3:17228766-17231021 FORWARD LENGTH=510	AT3G46780.1	TAIR10_pep_20101214_contaminants.fasta	54358.6	1	11	12	2	0.0014	0.0879
201210Orbi_Dave_Gelsample (1)	Uncategorized Sample	BioSample 1	P24 (F020889)	| Symbols: ATPHS2, PHS2 | alpha-glucan phosphorylase 2 | chr3:17301625-17306111 REVERSE LENGTH=841	AT3G46970.1	TAIR10_pep_20101214_contaminants.fasta	95162.3	1	37	50	138	0.17	0.589
201210Orbi_Dave_Gelsample (1)	Uncategorized Sample	BioSample 1	P25 (F020908)	| Symbols: ATPHS2, PHS2 | alpha-glucan phosphorylase 2 | chr3:17301625-17306111 REVERSE LENGTH=841	AT3G46970.1	TAIR10_pep_20101214_contaminants.fasta	95162.3	1	7	7	10	0.0111	0.134
201210Orbi_Dave_Gelsample (1)	Uncategorized Sample	BioSample 1	P26 (F020909)	| Symbols: ATPHS2, PHS2 | alpha-glucan phosphorylase 2 | chr3:17301625-17306111 REVERSE LENGTH=841	AT3G46970.1	TAIR10_pep_20101214_contaminants.fasta	95162.3	1	6	6	7	0.0077	0.0975
201211Orbi_Dave_Gelsample2	Uncategorized Sample	BioSample 1	S02 (F020978)	| Symbols: ATPHS2, PHS2 | alpha-glucan phosphorylase 2 | chr3:17301625-17306111 REVERSE LENGTH=841	AT3G46970.1	TAIR10_pep_20101214_contaminants.fasta	95162.3	1	5	5	7	0.00607	0.0583
201211Orbi_Dave_Gelsample2	Uncategorized Sample	BioSample 1	S03 (F020979)	| Symbols: ATPHS2, PHS2 | alpha-glucan phosphorylase 2 | chr3:17301625-17306111 REVERSE LENGTH=841	AT3G46970.1	TAIR10_pep_20101214_contaminants.fasta	95162.3	1	10	10	14	0.00997	0.132
201210Orbi_Dave_Gelsample (1)	Uncategorized Sample	BioSample 1	P47 (F020928)	| Symbols: MDH | malate dehydrogenase | chr3:17513657-17514868 FORWARD LENGTH=403	AT3G47520.1	TAIR10_pep_20101214_contaminants.fasta	42406.3	1	8	8	9	0.006	0.345
201210Orbi_Dave_Gelsample (1)	Uncategorized Sample	BioSample 1	P48 (F020929)	| Symbols: MDH | malate dehydrogenase | chr3:17513657-17514868 FORWARD LENGTH=403	AT3G47520.1	TAIR10_pep_20101214_contaminants.fasta	42406.3	1	3	3	5	0.0037	0.136
201210Orbi_Dave_Gelsample (1)	Uncategorized Sample	BioSample 1	P49 (F020930)	| Symbols: MDH | malate dehydrogenase | chr3:17513657-17514868 FORWARD LENGTH=403	AT3G47520.1	TAIR10_pep_20101214_contaminants.fasta	42406.3	1	9	10	16	0.0096	0.335
201211Orbi_Dave_Gelsample2	Uncategorized Sample	BioSample 1	S14 (F020990)	| Symbols: MDH | malate dehydrogenase | chr3:17513657-17514868 FORWARD LENGTH=403	AT3G47520.1	TAIR10_pep_20101214_contaminants.fasta	42406.3	1	2	2	4	0.00301	0.0298
201211Orbi_Dave_Gelsample2	Uncategorized Sample	BioSample 1	S17 (F020993)	| Symbols: MDH | malate dehydrogenase | chr3:17513657-17514868 FORWARD LENGTH=403	AT3G47520.1	TAIR10_pep_20101214_contaminants.fasta	42406.3	1	12	13	23	0.0162	0.419
201210Orbi_Dave_Gelsample (1)	Uncategorized Sample	BioSample 1	P37 (F020918)	| Symbols: ALDH2B4, ALDH2, ALDH2A | aldehyde dehydrogenase 2B4 | chr3:17717082-17719843 REVERSE LENGTH=538	AT3G48000.1	TAIR10_pep_20101214_contaminants.fasta	58590.4	0.998	2	2	34	0.0225	0.297
201211Orbi_Dave_Gelsample2	Uncategorized Sample	BioSample 1	S09 (F020985)	| Symbols: ALDH2B4, ALDH2, ALDH2A | aldehyde dehydrogenase 2B4 | chr3:17717082-17719843 REVERSE LENGTH=538	AT3G48000.1	TAIR10_pep_20101214_contaminants.fasta	58590.4	1	10	10	17	0.0108	0.243
201211Orbi_Dave_Gelsample2	Uncategorized Sample	BioSample 1	S57 (F021054)	| Symbols: ALDH2B4, ALDH2, ALDH2A | aldehyde dehydrogenase 2B4 | chr3:17717082-17719843 REVERSE LENGTH=538	AT3G48000.1	TAIR10_pep_20101214_contaminants.fasta	58590.4	1	12	12	4	0.0064	0.0945
201210Orbi_Dave_Gelsample (1)	Uncategorized Sample	BioSample 1	P38 (F020919)	| Symbols: GSA2 | glutamate-1-semialdehyde 2,1-aminomutase 2 | chr3:18049697-18051550 FORWARD LENGTH=472	AT3G48730.1	TAIR10_pep_20101214_contaminants.fasta	50143.4	1	6	8	12	0.0083	0.214
201210Orbi_Dave_Gelsample (1)	Uncategorized Sample	BioSample 1	P40 (F020921)	| Symbols: GSA2 | glutamate-1-semialdehyde 2,1-aminomutase 2 | chr3:18049697-18051550 FORWARD LENGTH=472	AT3G48730.1	TAIR10_pep_20101214_contaminants.fasta	50143.4	1	6	10	17	0.0095	0.208
201210Orbi_Dave_Gelsample (1)	Uncategorized Sample	BioSample 1	P42 (F020923)	| Symbols: GSA2 | glutamate-1-semialdehyde 2,1-aminomutase 2 | chr3:18049697-18051550 FORWARD LENGTH=472	AT3G48730.1	TAIR10_pep_20101214_contaminants.fasta	50143.4	1	4	4	6	0.0047	0.142
201210Orbi_Dave_Gelsample (1)	Uncategorized Sample	BioSample 1	P43 (F020924)	| Symbols: GSA2 | glutamate-1-semialdehyde 2,1-aminomutase 2 | chr3:18049697-18051550 FORWARD LENGTH=472	AT3G48730.1	TAIR10_pep_20101214_contaminants.fasta	50143.4	0.998	2	2	3	0.0016	0.0678
201210Orbi_Dave_Gelsample (1)	Uncategorized Sample	BioSample 1	P44 (F020925)	| Symbols: GSA2 | glutamate-1-semialdehyde 2,1-aminomutase 2 | chr3:18049697-18051550 FORWARD LENGTH=472	AT3G48730.1	TAIR10_pep_20101214_contaminants.fasta	50143.4	0.998	2	2	3	0.0017	0.0678
201211Orbi_Dave_Gelsample2	Uncategorized Sample	BioSample 1	S55 (F021052)	| Symbols: GSA2 | glutamate-1-semialdehyde 2,1-aminomutase 2 | chr3:18049697-18051550 FORWARD LENGTH=472	AT3G48730.1	TAIR10_pep_20101214_contaminants.fasta	50143.4	1	5	5	9	0.00606	0.148
201210Orbi_Dave_Gelsample (1)	Uncategorized Sample	BioSample 1	P29 (F020912)	| Symbols: | AMP-dependent synthetase and ligase family protein | chr3:18159031-18161294 REVERSE LENGTH=514	AT3G48990.1	TAIR10_pep_20101214_contaminants.fasta	55545.5	1	10	11	15	0.0088	0.233
201210Orbi_Dave_Gelsample (1)	Uncategorized Sample	BioSample 1	P32 (F020914)	| Symbols: | AMP-dependent synthetase and ligase family protein | chr3:18159031-18161294 REVERSE LENGTH=514	AT3G48990.1	TAIR10_pep_20101214_contaminants.fasta	55545.5	1	3	3	4	0.0029	0.0759
201211Orbi_Dave_Gelsample2	Uncategorized Sample	BioSample 1	S07 (F020983)	| Symbols: | AMP-dependent synthetase and ligase family protein | chr3:18159031-18161294 REVERSE LENGTH=514	AT3G48990.1	TAIR10_pep_20101214_contaminants.fasta	55545.5	0.999	2	2	3	0.00284	0.0506
201210Orbi_Dave_Gelsample (1)	Uncategorized Sample	BioSample 1	P38 (F020919)	| Symbols: ATMDAR1, MDAR1 | monodehydroascorbate reductase 1 | chr3:19601477-19604366 REVERSE LENGTH=434	AT3G52880.1	TAIR10_pep_20101214_contaminants.fasta	46488.1	1	6	7	8	0.0055	0.219
201210Orbi_Dave_Gelsample (1)	Uncategorized Sample	BioSample 1	P40 (F020921)	| Symbols: ATMDAR1, MDAR1 | monodehydroascorbate reductase 1 | chr3:19601477-19604366 REVERSE LENGTH=434	AT3G52880.1	TAIR10_pep_20101214_contaminants.fasta	46488.1	1	7	9	13	0.0072	0.221
201210Orbi_Dave_Gelsample (1)	Uncategorized Sample	BioSample 1	P43 (F020924)	| Symbols: ATMDAR1, MDAR1 | monodehydroascorbate reductase 1 | chr3:19601477-19604366 REVERSE LENGTH=434	AT3G52880.1	TAIR10_pep_20101214_contaminants.fasta	46488.1	1	20	24	41	0.0214	0.601
201211Orbi_Dave_Gelsample2	Uncategorized Sample	BioSample 1	S55 (F021052)	| Symbols: ATMDAR1, MDAR1 | monodehydroascorbate reductase 1 | chr3:19601477-19604366 REVERSE LENGTH=434	AT3G52880.1	TAIR10_pep_20101214_contaminants.fasta	46488.1	1	17	21	33	0.0222	0.509
201210Orbi_Dave_Gelsample (1)	Uncategorized Sample	BioSample 1	P47 (F020928)	| Symbols: | Aldolase superfamily protein | chr3:19627383-19628874 REVERSE LENGTH=358	AT3G52930.1	TAIR10_pep_20101214_contaminants.fasta	38540.4	1	4	5	6	0.004	0.154
201211Orbi_Dave_Gelsample2	Uncategorized Sample	BioSample 1	S13 (F020989)	| Symbols: | Aldolase superfamily protein | chr3:19627383-19628874 REVERSE LENGTH=358	AT3G52930.1	TAIR10_pep_20101214_contaminants.fasta	38540.4	1	2	2	3	0.00204	0.0642
201211Orbi_Dave_Gelsample2	Uncategorized Sample	BioSample 1	S17 (F020993)	| Symbols: | Aldolase superfamily protein | chr3:19627383-19628874 REVERSE LENGTH=358	AT3G52930.1	TAIR10_pep_20101214_contaminants.fasta	38540.4	1	5	5	7	0.00493	0.128
201211Orbi_Dave_Gelsample2	Uncategorized Sample	BioSample 1	S52 (F021049)	| Symbols: | Aldolase superfamily protein | chr3:19627383-19628874 REVERSE LENGTH=358	AT3G52930.1	TAIR10_pep_20101214_contaminants.fasta	38540.4	1	11	12	20	0.0124	0.332
201211Orbi_Dave_Gelsample2	Uncategorized Sample	BioSample 1	S57 (F021054)	| Symbols: | Aldolase superfamily protein | chr3:19627383-19628874 REVERSE LENGTH=358	AT3G52930.1	TAIR10_pep_20101214_contaminants.fasta	38540.4	1	4	4	6	0.00383	0.12
201210Orbi_Dave_Gelsample (1)	Uncategorized Sample	BioSample 1	P20 (F020885)	| Symbols: | glutamate-ammonia ligases;catalytics;glutamate-ammonia ligases | chr3:19707068-19711188 FORWARD LENGTH=852	AT3G53180.1	TAIR10_pep_20101214_contaminants.fasta	94388.7	1	7	7	10	0.0078	0.112
201211Orbi_Dave_Gelsample2	Uncategorized Sample	BioSample 1	S02 (F020978)	| Symbols: | glutamate-ammonia ligases;catalytics;glutamate-ammonia ligases | chr3:19707068-19711188 FORWARD LENGTH=852	AT3G53180.1	TAIR10_pep_20101214_contaminants.fasta	94388.7	1	5	5	6	0.0052	0.0704
201210Orbi_Dave_Gelsample (1)	Uncategorized Sample	BioSample 1	P58 (F020939)	| Symbols: UPP, PYRR | uracil phosphoribosyltransferase | chr3:19956914-19958699 REVERSE LENGTH=231	AT3G53900.1,AT3G53900.2	TAIR10_pep_20101214_contaminants.fasta	25162	1	11	13	21	0.0153	0.58
201210Orbi_Dave_Gelsample (1)	Uncategorized Sample	BioSample 1	P60 (F020941)	| Symbols: UPP, PYRR | uracil phosphoribosyltransferase | chr3:19956914-19958699 REVERSE LENGTH=231	AT3G53900.1,AT3G53900.2	TAIR10_pep_20101214_contaminants.fasta	25162	1	4	4	5	0.0036	0.268
201211Orbi_Dave_Gelsample2	Uncategorized Sample	BioSample 1	S28 (F021004)	| Symbols: UPP, PYRR | uracil phosphoribosyltransferase | chr3:19956914-19958699 REVERSE LENGTH=231	AT3G53900.1,AT3G53900.2	TAIR10_pep_20101214_contaminants.fasta	25162	1	3	3	3	0.00226	0.121
201210Orbi_Dave_Gelsample (1)	Uncategorized Sample	BioSample 1	P37 (F020918)	| Symbols: GR, EMB2360, ATGR2 | glutathione reductase | chr3:20230356-20233100 REVERSE LENGTH=565	AT3G54660.1	TAIR10_pep_20101214_contaminants.fasta	60853.6	1	4	5	7	0.0051	0.0973
201211Orbi_Dave_Gelsample2	Uncategorized Sample	BioSample 1	S57 (F021054)	| Symbols: GR, EMB2360, ATGR2 | glutathione reductase | chr3:20230356-20233100 REVERSE LENGTH=565	AT3G54660.1	TAIR10_pep_20101214_contaminants.fasta	60853.6	1	15	19	32	0.0204	0.273
201210Orbi_Dave_Gelsample (1)	Uncategorized Sample	BioSample 1	P15 (F020879)	| Symbols: ATCTIMC, TPI, CYTOTPI | triosephosphate isomerase | chr3:20553794-20556078 FORWARD LENGTH=254	AT3G55440.1	TAIR10_pep_20101214_contaminants.fasta	27168.2	0.998	2	2	3	0.0022	0.0984
201210Orbi_Dave_Gelsample (1)	Uncategorized Sample	BioSample 1	P58 (F020939)	| Symbols: ATCTIMC, TPI, CYTOTPI | triosephosphate isomerase | chr3:20553794-20556078 FORWARD LENGTH=254	AT3G55440.1	TAIR10_pep_20101214_contaminants.fasta	27168.2	1	3	3	5	0.0036	0.138
201210Orbi_Dave_Gelsample (1)	Uncategorized Sample	BioSample 1	P59 (F020940)	| Symbols: ATCTIMC, TPI, CYTOTPI | triosephosphate isomerase | chr3:20553794-20556078 FORWARD LENGTH=254	AT3G55440.1	TAIR10_pep_20101214_contaminants.fasta	27168.2	0.998	2	2	3	0.0027	0.0984
201211Orbi_Dave_Gelsample2	Uncategorized Sample	BioSample 1	S27 (F021003)	| Symbols: ATCTIMC, TPI, CYTOTPI | triosephosphate isomerase | chr3:20553794-20556078 FORWARD LENGTH=254	AT3G55440.1	TAIR10_pep_20101214_contaminants.fasta	27168.2	1	17	25	62	0.0493	0.669
201210Orbi_Dave_Gelsample (1)	Uncategorized Sample	BioSample 1	P42 (F020923)	| Symbols: SBPASE | sedoheptulose-bisphosphatase | chr3:20709640-20711421 FORWARD LENGTH=393	AT3G55800.1	TAIR10_pep_20101214_contaminants.fasta	42415.6	1	9	9	20	0.0155	0.328
201210Orbi_Dave_Gelsample (1)	Uncategorized Sample	BioSample 1	P45 (F020926)	| Symbols: SBPASE | sedoheptulose-bisphosphatase | chr3:20709640-20711421 FORWARD LENGTH=393	AT3G55800.1	TAIR10_pep_20101214_contaminants.fasta	42415.6	1	8	8	18	0.0131	0.234
201210Orbi_Dave_Gelsample (1)	Uncategorized Sample	BioSample 1	P46 (F020927)	| Symbols: SBPASE | sedoheptulose-bisphosphatase | chr3:20709640-20711421 FORWARD LENGTH=393	AT3G55800.1	TAIR10_pep_20101214_contaminants.fasta	42415.6	1	8	8	15	0.0106	0.239
201210Orbi_Dave_Gelsample (1)	Uncategorized Sample	BioSample 1	P51 (F020932)	| Symbols: SBPASE | sedoheptulose-bisphosphatase | chr3:20709640-20711421 FORWARD LENGTH=393	AT3G55800.1	TAIR10_pep_20101214_contaminants.fasta	42415.6	1	4	4	7	0.0055	0.115
201211Orbi_Dave_Gelsample2	Uncategorized Sample	BioSample 1	S12 (F020988)	| Symbols: SBPASE | sedoheptulose-bisphosphatase | chr3:20709640-20711421 FORWARD LENGTH=393	AT3G55800.1	TAIR10_pep_20101214_contaminants.fasta	42415.6	1	15	18	62	0.0429	0.473
201211Orbi_Dave_Gelsample2	Uncategorized Sample	BioSample 1	S22 (F020998)	| Symbols: SBPASE | sedoheptulose-bisphosphatase | chr3:20709640-20711421 FORWARD LENGTH=393	AT3G55800.1	TAIR10_pep_20101214_contaminants.fasta	42415.6	1	2	2	3	0.00232	0.0458
201211Orbi_Dave_Gelsample2	Uncategorized Sample	BioSample 1	S33 (F021015)	| Symbols: SBPASE | sedoheptulose-bisphosphatase | chr3:20709640-20711421 FORWARD LENGTH=393	AT3G55800.1	TAIR10_pep_20101214_contaminants.fasta	42415.6	1	6	6	11	0.00932	0.16
201210Orbi_Dave_Gelsample (1)	Uncategorized Sample	BioSample 1	P60 (F020941)	| Symbols: | Mog1/PsbP/DUF1795-like photosystem II reaction center PsbP family protein | chr3:20984807-20985913 FORWARD LENGTH=262	AT3G56650.1	TAIR10_pep_20101214_contaminants.fasta	28630.3	0.998	2	2	3	0.0024	0.154
201211Orbi_Dave_Gelsample2	Uncategorized Sample	BioSample 1	S30 (F021012)	| Symbols: | Mog1/PsbP/DUF1795-like photosystem II reaction center PsbP family protein | chr3:20984807-20985913 FORWARD LENGTH=262	AT3G56650.1	TAIR10_pep_20101214_contaminants.fasta	28630.3	1	4	5	2	0.0014	0.115
201211Orbi_Dave_Gelsample2	Uncategorized Sample	BioSample 1	S32 (F021014)	| Symbols: | Mog1/PsbP/DUF1795-like photosystem II reaction center PsbP family protein | chr3:20984807-20985913 FORWARD LENGTH=262	AT3G56650.1	TAIR10_pep_20101214_contaminants.fasta	28630.3	1	3	3	9	0.00636	0.183
201211Orbi_Dave_Gelsample2	Uncategorized Sample	BioSample 1	S33 (F021015)	| Symbols: | Mog1/PsbP/DUF1795-like photosystem II reaction center PsbP family protein | chr3:20984807-20985913 FORWARD LENGTH=262	AT3G56650.1	TAIR10_pep_20101214_contaminants.fasta	28630.3	1	5	5	9	0.00763	0.263
201211Orbi_Dave_Gelsample2	Uncategorized Sample	BioSample 1	S37 (F021019)	| Symbols: | Mog1/PsbP/DUF1795-like photosystem II reaction center PsbP family protein | chr3:20984807-20985913 FORWARD LENGTH=262	AT3G56650.1	TAIR10_pep_20101214_contaminants.fasta	28630.3	1	6	7	18	0.0155	0.49
201210Orbi_Dave_Gelsample (1)	Uncategorized Sample	BioSample 1	P43 (F020924)	| Symbols: CBL | cystathionine beta-lyase | chr3:21111939-21114521 REVERSE LENGTH=464	AT3G57050.1	TAIR10_pep_20101214_contaminants.fasta	50430.5	1	7	7	12	0.0063	0.203
201211Orbi_Dave_Gelsample2	Uncategorized Sample	BioSample 1	S50 (F021047)	| Symbols: CBL | cystathionine beta-lyase | chr3:21111939-21114521 REVERSE LENGTH=464	AT3G57050.1,AT3G57050.2	TAIR10_pep_20101214_contaminants.fasta	50430.5	1	4	4	5	0.00318	0.0819
201210Orbi_Dave_Gelsample (1)	Uncategorized Sample	BioSample 1	P44 (F020925)	| Symbols: VLN3, ATVLN3 | villin 3 | chr3:21243615-21249809 REVERSE LENGTH=965	AT3G57410.1	TAIR10_pep_20101214_contaminants.fasta	106350	1	5	5	8	0.00693	0.0635
201211Orbi_Dave_Gelsample2	Uncategorized Sample	BioSample 1	S01 (F020977)	| Symbols: VLN3, ATVLN3 | villin 3 | chr3:21243615-21249809 REVERSE LENGTH=965	AT3G57410.1	TAIR10_pep_20101214_contaminants.fasta	106350	1	5	5	9	0.0105	0.0591
201210Orbi_Dave_Gelsample (1)	Uncategorized Sample	BioSample 1	P40 (F020921)	| Symbols: ADSS | adenylosuccinate synthase | chr3:21334519-21336603 REVERSE LENGTH=490	AT3G57610.1	TAIR10_pep_20101214_contaminants.fasta	52965.5	1	5	5	7	0.0039	0.135
201211Orbi_Dave_Gelsample2	Uncategorized Sample	BioSample 1	S55 (F021052)	| Symbols: ADSS | adenylosuccinate synthase | chr3:21334519-21336603 REVERSE LENGTH=490	AT3G57610.1	TAIR10_pep_20101214_contaminants.fasta	52965.5	1	3	3	3	0.00202	0.0673
201210Orbi_Dave_Gelsample (1)	Uncategorized Sample	BioSample 1	P03 (F020895)	| Symbols: | ketol-acid reductoisomerase | chr3:21671561-21674639 FORWARD LENGTH=591	AT3G58610.1,AT3G58610.2,AT3G58610.3	TAIR10_pep_20101214_contaminants.fasta	63813.9	1	3	3	4	0.003	0.066
201210Orbi_Dave_Gelsample (1)	Uncategorized Sample	BioSample 1	P08 (F020969)	| Symbols: | ketol-acid reductoisomerase | chr3:21671561-21674639 FORWARD LENGTH=591	AT3G58610.1,AT3G58610.2,AT3G58610.3	TAIR10_pep_20101214_contaminants.fasta	63813.9	1	2	2	3	0.004	0.044
201210Orbi_Dave_Gelsample (1)	Uncategorized Sample	BioSample 1	P10 (F020875)	| Symbols: | ketol-acid reductoisomerase | chr3:21671561-21674639 FORWARD LENGTH=591	AT3G58610.1,AT3G58610.2,AT3G58610.3	TAIR10_pep_20101214_contaminants.fasta	63813.9	1	4	4	9	0.0055	0.0897
201210Orbi_Dave_Gelsample (1)	Uncategorized Sample	BioSample 1	P33 (F020915)	| Symbols: | ketol-acid reductoisomerase | chr3:21671561-21674639 FORWARD LENGTH=591	AT3G58610.1,AT3G58610.2,AT3G58610.3	TAIR10_pep_20101214_contaminants.fasta	63813.9	1	15	16	31	0.0219	0.349
201210Orbi_Dave_Gelsample (1)	Uncategorized Sample	BioSample 1	P34 (F020916)	| Symbols: | ketol-acid reductoisomerase | chr3:21671561-21674639 FORWARD LENGTH=591	AT3G58610.1,AT3G58610.2,AT3G58610.3	TAIR10_pep_20101214_contaminants.fasta	63813.9	1	2	2	2	0.0017	0.0406
201210Orbi_Dave_Gelsample (1)	Uncategorized Sample	BioSample 1	P35 (F020917)	| Symbols: | ketol-acid reductoisomerase | chr3:21671561-21674639 FORWARD LENGTH=591	AT3G58610.1,AT3G58610.2,AT3G58610.3	TAIR10_pep_20101214_contaminants.fasta	63813.9	1	8	8	14	0.0133	0.176
201210Orbi_Dave_Gelsample (1)	Uncategorized Sample	BioSample 1	P36 (F020967)	| Symbols: | ketol-acid reductoisomerase | chr3:21671561-21674639 FORWARD LENGTH=591	AT3G58610.1,AT3G58610.2,AT3G58610.3	TAIR10_pep_20101214_contaminants.fasta	63813.9	1	5	5	9	0.0143	0.112
201211Orbi_Dave_Gelsample2	Uncategorized Sample	BioSample 1	S02 (F020978)	| Symbols: | ketol-acid reductoisomerase | chr3:21671561-21674639 FORWARD LENGTH=591	AT3G58610.1,AT3G58610.2,AT3G58610.3	TAIR10_pep_20101214_contaminants.fasta	63813.9	1	6	6	10	0.00867	0.105
201211Orbi_Dave_Gelsample2	Uncategorized Sample	BioSample 1	S04 (F020980)	| Symbols: | ketol-acid reductoisomerase | chr3:21671561-21674639 FORWARD LENGTH=591	AT3G58610.1,AT3G58610.2,AT3G58610.3	TAIR10_pep_20101214_contaminants.fasta	63813.9	1	2	2	3	0.00194	0.0372
201211Orbi_Dave_Gelsample2	Uncategorized Sample	BioSample 1	S08 (F020984)	| Symbols: | ketol-acid reductoisomerase | chr3:21671561-21674639 FORWARD LENGTH=591	AT3G58610.1,AT3G58610.2,AT3G58610.3	TAIR10_pep_20101214_contaminants.fasta	63813.9	1	8	8	14	0.00923	0.137
201211Orbi_Dave_Gelsample2	Uncategorized Sample	BioSample 1	S09 (F020985)	| Symbols: | ketol-acid reductoisomerase | chr3:21671561-21674639 FORWARD LENGTH=591	AT3G58610.1,AT3G58610.2,AT3G58610.3	TAIR10_pep_20101214_contaminants.fasta	63813.9	1	6	6	13	0.0086	0.115
201210Orbi_Dave_Gelsample (1)	Uncategorized Sample	BioSample 1	P05 (F020904)	| Symbols: | Transketolase | chr3:22454004-22456824 FORWARD LENGTH=741	AT3G60750.1	TAIR10_pep_20101214_contaminants.fasta	79970.1	1	35	51	201	0.158	0.622
201210Orbi_Dave_Gelsample (1)	Uncategorized Sample	BioSample 1	P06 (F020905)	| Symbols: | Transketolase | chr3:22454004-22456824 FORWARD LENGTH=741	AT3G60750.1	TAIR10_pep_20101214_contaminants.fasta	79970.1	1	27	34	127	0.0845	0.475
201210Orbi_Dave_Gelsample (1)	Uncategorized Sample	BioSample 1	P21 (F020886)	| Symbols: | Transketolase | chr3:22454004-22456824 FORWARD LENGTH=741	AT3G60750.1	TAIR10_pep_20101214_contaminants.fasta	79970.1	1	5	5	6	0.0047	0.104
201210Orbi_Dave_Gelsample (1)	Uncategorized Sample	BioSample 1	P27 (F020910)	| Symbols: | Transketolase | chr3:22454004-22456824 FORWARD LENGTH=741	AT3G60750.1	TAIR10_pep_20101214_contaminants.fasta	79970.1	1	17	19	33	0.022	0.304
201210Orbi_Dave_Gelsample (1)	Uncategorized Sample	BioSample 1	P28 (F020911)	| Symbols: | Transketolase | chr3:22454004-22456824 FORWARD LENGTH=741	AT3G60750.1	TAIR10_pep_20101214_contaminants.fasta	79970.1	1	28	39	92	0.062	0.565
201211Orbi_Dave_Gelsample2	Uncategorized Sample	BioSample 1	S01 (F020977)	| Symbols: | Transketolase | chr3:22454004-22456824 FORWARD LENGTH=741	AT3G60750.1,AT3G60750.2	TAIR10_pep_20101214_contaminants.fasta	79970.1	1	2	2	5	0.00585	0.0283
201211Orbi_Dave_Gelsample2	Uncategorized Sample	BioSample 1	S03 (F020979)	| Symbols: | Transketolase | chr3:22454004-22456824 FORWARD LENGTH=741	AT3G60750.1,AT3G60750.2	TAIR10_pep_20101214_contaminants.fasta	79970.1	1	9	9	15	0.0107	0.167
201211Orbi_Dave_Gelsample2	Uncategorized Sample	BioSample 1	S04 (F020980)	| Symbols: | Transketolase | chr3:22454004-22456824 FORWARD LENGTH=741	AT3G60750.1,AT3G60750.2	TAIR10_pep_20101214_contaminants.fasta	79970.1	1	19	21	34	0.0219	0.301
201211Orbi_Dave_Gelsample2	Uncategorized Sample	BioSample 1	S30 (F021012)	| Symbols: PBF1 | N-terminal nucleophile aminohydrolases (Ntn hydrolases) superfamily protein | chr3:22472038-22473809 REVERSE LENGTH=223	AT3G60820.1,AT3G60820.2,AT3G60820.3	TAIR10_pep_20101214_contaminants.fasta	24645	1	5	5	11	0.00777	0.283
201211Orbi_Dave_Gelsample2	Uncategorized Sample	BioSample 1	S31 (F021013)	| Symbols: PBF1 | N-terminal nucleophile aminohydrolases (Ntn hydrolases) superfamily protein | chr3:22472038-22473809 REVERSE LENGTH=223	AT3G60820.1,AT3G60820.2,AT3G60820.3	TAIR10_pep_20101214_contaminants.fasta	24645	1	4	4	6	0.00461	0.206
201210Orbi_Dave_Gelsample (1)	Uncategorized Sample	BioSample 1	P58 (F020939)	| Symbols: PBF1 | N-terminal nucleophile aminohydrolases (Ntn hydrolases) superfamily protein | chr3:22472038-22473809 REVERSE LENGTH=223	AT3G60820.1,AT3G60820.3	TAIR10_pep_20101214_contaminants.fasta	24645	0.998	2	2	3	0.0022	0.0987
201210Orbi_Dave_Gelsample (1)	Uncategorized Sample	BioSample 1	P59 (F020940)	| Symbols: PBF1 | N-terminal nucleophile aminohydrolases (Ntn hydrolases) superfamily protein | chr3:22472038-22473809 REVERSE LENGTH=223	AT3G60820.1,AT3G60820.3	TAIR10_pep_20101214_contaminants.fasta	24645	1	5	5	10	0.0089	0.269
201210Orbi_Dave_Gelsample (1)	Uncategorized Sample	BioSample 1	P60 (F020941)	| Symbols: PBF1 | N-terminal nucleophile aminohydrolases (Ntn hydrolases) superfamily protein | chr3:22472038-22473809 REVERSE LENGTH=223	AT3G60820.1,AT3G60820.3	TAIR10_pep_20101214_contaminants.fasta	24645	1	8	8	13	0.0094	0.525
201210Orbi_Dave_Gelsample (1)	Uncategorized Sample	BioSample 1	P47 (F020928)	| Symbols: ATCYSC1, ARATH;BSAS3;1, CYSC1 | cysteine synthase C1 | chr3:22735885-22737792 FORWARD LENGTH=368	AT3G61440.1	TAIR10_pep_20101214_contaminants.fasta	39928.6	1	5	5	8	0.0053	0.136
201210Orbi_Dave_Gelsample (1)	Uncategorized Sample	BioSample 1	P54 (F020935)	| Symbols: ATCYSC1, ARATH;BSAS3;1, CYSC1 | cysteine synthase C1 | chr3:22735885-22737792 FORWARD LENGTH=368	AT3G61440.1	TAIR10_pep_20101214_contaminants.fasta	39928.6	0.998	2	2	2	0.0016	0.0679
201211Orbi_Dave_Gelsample2	Uncategorized Sample	BioSample 1	S10 (F020986)	| Symbols: ATCYSC1, ARATH;BSAS3;1, CYSC1 | cysteine synthase C1 | chr3:22735885-22737792 FORWARD LENGTH=368	AT3G61440.1	TAIR10_pep_20101214_contaminants.fasta	39928.6	1	4	4	5	0.00379	0.111
201210Orbi_Dave_Gelsample (1)	Uncategorized Sample	BioSample 1	P63 (F020944)	| Symbols: ROC4 | rotamase CYP 4 | chr3:22973708-22975139 FORWARD LENGTH=260	AT3G62030.1,AT3G62030.2,AT3G62030.3	TAIR10_pep_20101214_contaminants.fasta	28208.1	0.998	2	2	2	0.0017	0.0808
201210Orbi_Dave_Gelsample (1)	Uncategorized Sample	BioSample 1	P65 (F020946)	| Symbols: ROC4 | rotamase CYP 4 | chr3:22973708-22975139 FORWARD LENGTH=260	AT3G62030.1,AT3G62030.2,AT3G62030.3	TAIR10_pep_20101214_contaminants.fasta	28208.1	1	8	12	37	0.0309	0.369
201210Orbi_Dave_Gelsample (1)	Uncategorized Sample	BioSample 1	P68 (F020949)	| Symbols: ROC4 | rotamase CYP 4 | chr3:22973708-22975139 FORWARD LENGTH=260	AT3G62030.1,AT3G62030.2,AT3G62030.3	TAIR10_pep_20101214_contaminants.fasta	28208.1	1	3	3	3	0.0034	0.123
201211Orbi_Dave_Gelsample2	Uncategorized Sample	BioSample 1	S35 (F021017)	| Symbols: ROC4 | rotamase CYP 4 | chr3:22973708-22975139 FORWARD LENGTH=260	AT3G62030.1,AT3G62030.2,AT3G62030.3	TAIR10_pep_20101214_contaminants.fasta	28208.1	1	5	5	15	0.0117	0.181
201211Orbi_Dave_Gelsample2	Uncategorized Sample	BioSample 1	S37 (F021019)	| Symbols: ROC4 | rotamase CYP 4 | chr3:22973708-22975139 FORWARD LENGTH=260	AT3G62030.1,AT3G62030.2,AT3G62030.3	TAIR10_pep_20101214_contaminants.fasta	28208.1	1	4	4	7	0.00548	0.135
201211Orbi_Dave_Gelsample2	Uncategorized Sample	BioSample 1	S44 (F021041)	| Symbols: ROC4 | rotamase CYP 4 | chr3:22973708-22975139 FORWARD LENGTH=260	AT3G62030.1,AT3G62030.2,AT3G62030.3	TAIR10_pep_20101214_contaminants.fasta	28208.1	1	6	6	11	0.0128	0.223
201210Orbi_Dave_Gelsample (1)	Uncategorized Sample	BioSample 1	P29 (F020912)	| Symbols: | Class II aaRS and biotin synthetases superfamily protein | chr3:23001227-23003849 REVERSE LENGTH=530	AT3G62120.1,AT3G62120.2	TAIR10_pep_20101214_contaminants.fasta	60755.7	1	5	5	5	0.0029	0.168
201211Orbi_Dave_Gelsample2	Uncategorized Sample	BioSample 1	S08 (F020984)	| Symbols: | Class II aaRS and biotin synthetases superfamily protein | chr3:23001227-23003849 REVERSE LENGTH=530	AT3G62120.1,AT3G62120.2	TAIR10_pep_20101214_contaminants.fasta	60755.7	1	2	2	2	0.00132	0.0453
201210Orbi_Dave_Gelsample (1)	Uncategorized Sample	BioSample 1	P34 (F020916)	| Symbols: CCD1, ATCCD1, ATNCED1, NCED1 | carotenoid cleavage dioxygenase 1 | chr3:23452940-23455896 FORWARD LENGTH=538	AT3G63520.1	TAIR10_pep_20101214_contaminants.fasta	60910	1	8	8	13	0.0107	0.208
201211Orbi_Dave_Gelsample2	Uncategorized Sample	BioSample 1	S09 (F020985)	| Symbols: CCD1, ATCCD1, ATNCED1, NCED1 | carotenoid cleavage dioxygenase 1 | chr3:23452940-23455896 FORWARD LENGTH=538	AT3G63520.1	TAIR10_pep_20101214_contaminants.fasta	60910	1	8	8	11	0.00728	0.162
201210Orbi_Dave_Gelsample (1)	Uncategorized Sample	BioSample 1	P62 (F020943)	| Symbols: | Mog1/PsbP/DUF1795-like photosystem II reaction center PsbP family protein | chr3:23459372-23459803 REVERSE LENGTH=143	AT3G63540.1	TAIR10_pep_20101214_contaminants.fasta	16279.3	1	2	3	20	0.0169	0.323
201210Orbi_Dave_Gelsample (1)	Uncategorized Sample	BioSample 1	P63 (F020944)	| Symbols: | Mog1/PsbP/DUF1795-like photosystem II reaction center PsbP family protein | chr3:23459372-23459803 REVERSE LENGTH=143	AT3G63540.1	TAIR10_pep_20101214_contaminants.fasta	16279.3	1	3	3	12	0.00935	0.273
201211Orbi_Dave_Gelsample2	Uncategorized Sample	BioSample 1	S38 (F021020)	| Symbols: | Mog1/PsbP/DUF1795-like photosystem II reaction center PsbP family protein | chr3:23459372-23459803 REVERSE LENGTH=143	AT3G63540.1	TAIR10_pep_20101214_contaminants.fasta	16279.3	1	5	7	6	0.00416	0.141
201210Orbi_Dave_Gelsample (1)	Uncategorized Sample	BioSample 1	P34 (F020916)	| Symbols: NAD-ME2 | NAD-dependent malic enzyme 2 | chr4:242817-246522 REVERSE LENGTH=607	AT4G00570.1	TAIR10_pep_20101214_contaminants.fasta	66641.8	1	16	20	34	0.028	0.438
201211Orbi_Dave_Gelsample2	Uncategorized Sample	BioSample 1	S08 (F020984)	| Symbols: NAD-ME2 | NAD-dependent malic enzyme 2 | chr4:242817-246522 REVERSE LENGTH=607	AT4G00570.1	TAIR10_pep_20101214_contaminants.fasta	66641.8	1	13	13	19	0.0125	0.242
201211Orbi_Dave_Gelsample2	Uncategorized Sample	BioSample 1	S09 (F020985)	| Symbols: NAD-ME2 | NAD-dependent malic enzyme 2 | chr4:242817-246522 REVERSE LENGTH=607	AT4G00570.1	TAIR10_pep_20101214_contaminants.fasta	66641.8	1	23	25	48	0.0318	0.374
201210Orbi_Dave_Gelsample (1)	Uncategorized Sample	BioSample 1	P41 (F020922)	| Symbols: | unknown protein; FUNCTIONS IN: molecular_function unknown; INVOLVED IN: biological_process unknown; LOCATED IN: thylakoid, chloroplast thylakoid membrane, chloroplast, plastoglobule, chloroplast envelope; EXPRESSED IN: 23 plant structures; EXPRESSED DURING: 14 growth stages; BEST Arabidopsis thaliana protein match is: unknown protein (TAIR:AT4G38100.1); Has 323 Blast hits to 323 prot…	AT4G01150.1	TAIR10_pep_20101214_contaminants.fasta	17698.1	1	3	3	15	0.0141	0.265
201210Orbi_Dave_Gelsample (1)	Uncategorized Sample	BioSample 1	P46 (F020927)	| Symbols: | unknown protein; FUNCTIONS IN: molecular_function unknown; INVOLVED IN: biological_process unknown; LOCATED IN: thylakoid, chloroplast thylakoid membrane, chloroplast, plastoglobule, chloroplast envelope; EXPRESSED IN: 23 plant structures; EXPRESSED DURING: 14 growth stages; BEST Arabidopsis thaliana protein match is: unknown protein (TAIR:AT4G38100.1); Has 323 Blast hits to 323 prot…	AT4G01150.1	TAIR10_pep_20101214_contaminants.fasta	17698.1	0.997	2	2	12	0.0113	0.253
201210Orbi_Dave_Gelsample (1)	Uncategorized Sample	BioSample 1	P73 (F020954)	| Symbols: | unknown protein; FUNCTIONS IN: molecular_function unknown; INVOLVED IN: biological_process unknown; LOCATED IN: thylakoid, chloroplast thylakoid membrane, chloroplast, plastoglobule, chloroplast envelope; EXPRESSED IN: 23 plant structures; EXPRESSED DURING: 14 growth stages; BEST Arabidopsis thaliana protein match is: unknown protein (TAIR:AT4G38100.1); Has 323 Blast hits to 323 prot…	AT4G01150.1	TAIR10_pep_20101214_contaminants.fasta	17698.1	0.998	2	2	2	0.0014	0.0976
201211Orbi_Dave_Gelsample2	Uncategorized Sample	BioSample 1	S18 (F020994)	| Symbols: | unknown protein; FUNCTIONS IN: molecular_function unknown; INVOLVED IN: biological_process unknown; LOCATED IN: thylakoid, chloroplast thylakoid membrane, chloroplast, plastoglobule, chloroplast envelope; EXPRESSED IN: 23 plant structures; EXPRESSED DURING: 14 growth stages; BEST Arabidopsis thaliana protein match is: unknown protein (TAIR:AT4G38100.1); Has 323 Blast hits to 323 prot…	AT4G01150.1	TAIR10_pep_20101214_contaminants.fasta	17698.1	1	4	4	5	0.0037	0.0885
201211Orbi_Dave_Gelsample2	Uncategorized Sample	BioSample 1	S22 (F020998)	| Symbols: | unknown protein; FUNCTIONS IN: molecular_function unknown; INVOLVED IN: biological_process unknown; LOCATED IN: thylakoid, chloroplast thylakoid membrane, chloroplast, plastoglobule, chloroplast envelope; EXPRESSED IN: 23 plant structures; EXPRESSED DURING: 14 growth stages; BEST Arabidopsis thaliana protein match is: unknown protein (TAIR:AT4G38100.1); Has 323 Blast hits to 323 prot…	AT4G01150.1	TAIR10_pep_20101214_contaminants.fasta	17698.1	1	4	4	3	0.0028	0.049
201211Orbi_Dave_Gelsample2	Uncategorized Sample	BioSample 1	S29 (F021005)	| Symbols: | unknown protein; FUNCTIONS IN: molecular_function unknown; INVOLVED IN: biological_process unknown; LOCATED IN: thylakoid, chloroplast thylakoid membrane, chloroplast, plastoglobule, chloroplast envelope; EXPRESSED IN: 23 plant structures; EXPRESSED DURING: 14 growth stages; BEST Arabidopsis thaliana protein match is: unknown protein (TAIR:AT4G38100.1); Has 323 Blast hits to 323 prot…	AT4G01150.1	TAIR10_pep_20101214_contaminants.fasta	17698.1	1	2	2	5	0.00352	0.0728
201210Orbi_Dave_Gelsample (1)	Uncategorized Sample	BioSample 1	P51 (F020932)	| Symbols: | Cysteine proteinases superfamily protein | chr4:694857-696937 FORWARD LENGTH=359	AT4G01610.1,AT4G01610.2	TAIR10_pep_20101214_contaminants.fasta	39417.8	0.998	2	2	3	0.0023	0.0864
201211Orbi_Dave_Gelsample2	Uncategorized Sample	BioSample 1	S22 (F020998)	| Symbols: | Cysteine proteinases superfamily protein | chr4:694857-696937 FORWARD LENGTH=359	AT4G01610.1,AT4G01610.2	TAIR10_pep_20101214_contaminants.fasta	39417.8	1	5	5	8	0.00619	0.153
201210Orbi_Dave_Gelsample (1)	Uncategorized Sample	BioSample 1	P58 (F020939)	| Symbols: ATGSTF2, ATPM24.1, ATPM24, GST2, GSTF2 | glutathione S-transferase PHI 2 | chr4:1110673-1111531 REVERSE LENGTH=212	AT4G02520.1	TAIR10_pep_20101214_contaminants.fasta	24129.2	1	9	13	24	0.0027	0.177
201210Orbi_Dave_Gelsample (1)	Uncategorized Sample	BioSample 1	P59 (F020940)	| Symbols: ATGSTF2, ATPM24.1, ATPM24, GST2, GSTF2 | glutathione S-transferase PHI 2 | chr4:1110673-1111531 REVERSE LENGTH=212	AT4G02520.1	TAIR10_pep_20101214_contaminants.fasta	24129.2	1	13	16	27	0.104	0.995
201210Orbi_Dave_Gelsample (1)	Uncategorized Sample	BioSample 1	P60 (F020941)	| Symbols: ATGSTF2, ATPM24.1, ATPM24, GST2, GSTF2 | glutathione S-transferase PHI 2 | chr4:1110673-1111531 REVERSE LENGTH=212	AT4G02520.1	TAIR10_pep_20101214_contaminants.fasta	24129.2	1	28	44	145	0.00857	0.387
201210Orbi_Dave_Gelsample (1)	Uncategorized Sample	BioSample 1	P61 (F020942)	| Symbols: ATGSTF2, ATPM24.1, ATPM24, GST2, GSTF2 | glutathione S-transferase PHI 2 | chr4:1110673-1111531 REVERSE LENGTH=212	AT4G02520.1	TAIR10_pep_20101214_contaminants.fasta	24129.2	1	3	5	8	0.0268	0.635
201211Orbi_Dave_Gelsample2	Uncategorized Sample	BioSample 1	S17 (F020993)	| Symbols: ATGSTF2, ATPM24.1, ATPM24, GST2, GSTF2 | glutathione S-transferase PHI 2 | chr4:1110673-1111531 REVERSE LENGTH=212	AT4G02520.1	TAIR10_pep_20101214_contaminants.fasta	24129.2	1	6	6	10	0.0297	0.487
201211Orbi_Dave_Gelsample2	Uncategorized Sample	BioSample 1	S30 (F021012)	| Symbols: ATGSTF2, ATPM24.1, ATPM24, GST2, GSTF2 | glutathione S-transferase PHI 2 | chr4:1110673-1111531 REVERSE LENGTH=212	AT4G02520.1	TAIR10_pep_20101214_contaminants.fasta	24129.2	1	5	5	8	0.00548	0.137
201211Orbi_Dave_Gelsample2	Uncategorized Sample	BioSample 1	S32 (F021014)	| Symbols: ATGSTF2, ATPM24.1, ATPM24, GST2, GSTF2 | glutathione S-transferase PHI 2 | chr4:1110673-1111531 REVERSE LENGTH=212	AT4G02520.1	TAIR10_pep_20101214_contaminants.fasta	24129.2	1	6	7	13	0.00527	0.14
201211Orbi_Dave_Gelsample2	Uncategorized Sample	BioSample 1	S33 (F021015)	| Symbols: ATGSTF2, ATPM24.1, ATPM24, GST2, GSTF2 | glutathione S-transferase PHI 2 | chr4:1110673-1111531 REVERSE LENGTH=212	AT4G02520.1	TAIR10_pep_20101214_contaminants.fasta	24129.2	1	3	3	4	0.0018	0.11
201211Orbi_Dave_Gelsample2	Uncategorized Sample	BioSample 1	S34 (F021016)	| Symbols: ATGSTF2, ATPM24.1, ATPM24, GST2, GSTF2 | glutathione S-transferase PHI 2 | chr4:1110673-1111531 REVERSE LENGTH=212	AT4G02520.1	TAIR10_pep_20101214_contaminants.fasta	24129.2	1	6	7	11	0.00548	0.183
201210Orbi_Dave_Gelsample (1)	Uncategorized Sample	BioSample 1	P65 (F020946)	| Symbols: PETC, PGR1 | photosynthetic electron transfer C | chr4:1440314-1441717 FORWARD LENGTH=229	AT4G03280.1,AT4G03280.2	TAIR10_pep_20101214_contaminants.fasta	24366.3	1	3	3	4	0.0033	0.201
201211Orbi_Dave_Gelsample2	Uncategorized Sample	BioSample 1	S42 (F021024)	| Symbols: PETC, PGR1 | photosynthetic electron transfer C | chr4:1440314-1441717 FORWARD LENGTH=229	AT4G03280.1,AT4G03280.2	TAIR10_pep_20101214_contaminants.fasta	24366.3	1	7	9	22	0.0239	0.441
201211Orbi_Dave_Gelsample2	Uncategorized Sample	BioSample 1	S44 (F021041)	| Symbols: PETC, PGR1 | photosynthetic electron transfer C | chr4:1440314-1441717 FORWARD LENGTH=229	AT4G03280.1,AT4G03280.2	TAIR10_pep_20101214_contaminants.fasta	24366.3	1	3	3	3	0.00348	0.197
201210Orbi_Dave_Gelsample (1)	Uncategorized Sample	BioSample 1	P37 (F020918)	| Symbols: ATPC1 | ATPase, F1 complex, gamma subunit protein | chr4:2350761-2351882 REVERSE LENGTH=373	AT4G04640.1	TAIR10_pep_20101214_contaminants.fasta	40911.9	1	4	4	4	0.0029	0.134
201210Orbi_Dave_Gelsample (1)	Uncategorized Sample	BioSample 1	P46 (F020927)	| Symbols: ATPC1 | ATPase, F1 complex, gamma subunit protein | chr4:2350761-2351882 REVERSE LENGTH=373	AT4G04640.1	TAIR10_pep_20101214_contaminants.fasta	40911.9	1	4	4	6	0.0042	0.126
201210Orbi_Dave_Gelsample (1)	Uncategorized Sample	BioSample 1	P47 (F020928)	| Symbols: ATPC1 | ATPase, F1 complex, gamma subunit protein | chr4:2350761-2351882 REVERSE LENGTH=373	AT4G04640.1	TAIR10_pep_20101214_contaminants.fasta	40911.9	1	10	11	20	0.0133	0.298
201211Orbi_Dave_Gelsample2	Uncategorized Sample	BioSample 1	S05 (F020981)	| Symbols: ATPC1 | ATPase, F1 complex, gamma subunit protein | chr4:2350761-2351882 REVERSE LENGTH=373	AT4G04640.1	TAIR10_pep_20101214_contaminants.fasta	40911.9	1	11	12	110	0.0747	0.429
201211Orbi_Dave_Gelsample2	Uncategorized Sample	BioSample 1	S13 (F020989)	| Symbols: ATPC1 | ATPase, F1 complex, gamma subunit protein | chr4:2350761-2351882 REVERSE LENGTH=373	AT4G04640.1	TAIR10_pep_20101214_contaminants.fasta	40911.9	1	16	19	7	0.00493	0.145
201211Orbi_Dave_Gelsample2	Uncategorized Sample	BioSample 1	S17 (F020993)	| Symbols: ATPC1 | ATPase, F1 complex, gamma subunit protein | chr4:2350761-2351882 REVERSE LENGTH=373	AT4G04640.1	TAIR10_pep_20101214_contaminants.fasta	40911.9	1	5	5	20	0.0153	0.239
201211Orbi_Dave_Gelsample2	Uncategorized Sample	BioSample 1	S21 (F020997)	| Symbols: ATPC1 | ATPase, F1 complex, gamma subunit protein | chr4:2350761-2351882 REVERSE LENGTH=373	AT4G04640.1	TAIR10_pep_20101214_contaminants.fasta	40911.9	1	8	9	35	0.0218	0.386
201211Orbi_Dave_Gelsample2	Uncategorized Sample	BioSample 1	S52 (F021049)	| Symbols: ATPC1 | ATPase, F1 complex, gamma subunit protein | chr4:2350761-2351882 REVERSE LENGTH=373	AT4G04640.1	TAIR10_pep_20101214_contaminants.fasta	40911.9	1	14	17	5	0.0037	0.119
201210Orbi_Dave_Gelsample (1)	Uncategorized Sample	BioSample 1	P57 (F020938)	| Symbols: SAPX | stromal ascorbate peroxidase | chr4:5314999-5317071 FORWARD LENGTH=372	AT4G08390.1,AT4G08390.2,AT4G08390.3,AT4G08390.4	TAIR10_pep_20101214_contaminants.fasta	40409.4	0.998	2	2	2	0.0013	0.0618
201211Orbi_Dave_Gelsample2	Uncategorized Sample	BioSample 1	S24 (F021000)	| Symbols: SAPX | stromal ascorbate peroxidase | chr4:5314999-5317071 FORWARD LENGTH=372	AT4G08390.1,AT4G08390.2,AT4G08390.3,AT4G08390.4	TAIR10_pep_20101214_contaminants.fasta	40409.4	1	14	16	22	0.0153	0.376
201210Orbi_Dave_Gelsample (1)	Uncategorized Sample	BioSample 1	P48 (F020929)	| Symbols: | Arginase/deacetylase superfamily protein | chr4:5646654-5648693 REVERSE LENGTH=344	AT4G08870.1,AT4G08870.2	TAIR10_pep_20101214_contaminants.fasta	37980.9	0.998	2	2	3	0.0022	0.0669
201211Orbi_Dave_Gelsample2	Uncategorized Sample	BioSample 1	S13 (F020989)	| Symbols: | Arginase/deacetylase superfamily protein | chr4:5646654-5648693 REVERSE LENGTH=344	AT4G08870.1,AT4G08870.2	TAIR10_pep_20101214_contaminants.fasta	37980.9	1	4	4	8	0.00543	0.125
201210Orbi_Dave_Gelsample (1)	Uncategorized Sample	BioSample 1	P46 (F020927)	| Symbols: GRF1, GF14 CHI | general regulatory factor 1 | chr4:5775387-5777157 FORWARD LENGTH=267	AT4G09000.1	TAIR10_pep_20101214_contaminants.fasta	29932.9	1	3	3	3	0.0021	0.139
201210Orbi_Dave_Gelsample (1)	Uncategorized Sample	BioSample 1	P56 (F020937)	| Symbols: GRF1, GF14 CHI | general regulatory factor 1 | chr4:5775387-5777157 FORWARD LENGTH=267	AT4G09000.1	TAIR10_pep_20101214_contaminants.fasta	29932.9	1	17	25	49	0.0416	0.678
201211Orbi_Dave_Gelsample2	Uncategorized Sample	BioSample 1	S53 (F021050)	| Symbols: GRF1, GF14 CHI | general regulatory factor 1 | chr4:5775387-5777157 FORWARD LENGTH=267	AT4G09000.1,AT4G09000.2	TAIR10_pep_20101214_contaminants.fasta	29932.9	1	9	14	25	0.0184	0.558
201210Orbi_Dave_Gelsample (1)	Uncategorized Sample	BioSample 1	P70 (F020951)	| Symbols: NDPK1 | Nucleoside diphosphate kinase family protein | chr4:5923424-5924366 FORWARD LENGTH=169	AT4G09320.1	TAIR10_pep_20101214_contaminants.fasta	18814.3	1	3	3	5	0.0057	0.201
201210Orbi_Dave_Gelsample (1)	Uncategorized Sample	BioSample 1	P71 (F020952)	| Symbols: NDPK1 | Nucleoside diphosphate kinase family protein | chr4:5923424-5924366 FORWARD LENGTH=169	AT4G09320.1	TAIR10_pep_20101214_contaminants.fasta	18814.3	1	3	3	5	0.0039	0.225
201210Orbi_Dave_Gelsample (1)	Uncategorized Sample	BioSample 1	P72 (F020953)	| Symbols: NDPK1 | Nucleoside diphosphate kinase family protein | chr4:5923424-5924366 FORWARD LENGTH=169	AT4G09320.1	TAIR10_pep_20101214_contaminants.fasta	18814.3	1	4	4	8	0.0081	0.207
201211Orbi_Dave_Gelsample2	Uncategorized Sample	BioSample 1	S28 (F021004)	| Symbols: NDPK1 | Nucleoside diphosphate kinase family protein | chr4:5923424-5924366 FORWARD LENGTH=169	AT4G09320.1	TAIR10_pep_20101214_contaminants.fasta	18814.3	1	3	3	4	0.00301	0.201
201211Orbi_Dave_Gelsample2	Uncategorized Sample	BioSample 1	S31 (F021013)	| Symbols: NDPK1 | Nucleoside diphosphate kinase family protein | chr4:5923424-5924366 FORWARD LENGTH=169	AT4G09320.1	TAIR10_pep_20101214_contaminants.fasta	18814.3	1	5	5	7	0.00538	0.284
201211Orbi_Dave_Gelsample2	Uncategorized Sample	BioSample 1	S34 (F021016)	| Symbols: NDPK1 | Nucleoside diphosphate kinase family protein | chr4:5923424-5924366 FORWARD LENGTH=169	AT4G09320.1	TAIR10_pep_20101214_contaminants.fasta	18814.3	1	3	3	5	0.00424	0.201
201211Orbi_Dave_Gelsample2	Uncategorized Sample	BioSample 1	S47 (F021044)	| Symbols: NDPK1 | Nucleoside diphosphate kinase family protein | chr4:5923424-5924366 FORWARD LENGTH=169	AT4G09320.1	TAIR10_pep_20101214_contaminants.fasta	18814.3	1	3	3	4	0.00613	0.201
201211Orbi_Dave_Gelsample2	Uncategorized Sample	BioSample 1	S48 (F021045)	| Symbols: NDPK1 | Nucleoside diphosphate kinase family protein | chr4:5923424-5924366 FORWARD LENGTH=169	AT4G09320.1	TAIR10_pep_20101214_contaminants.fasta	18814.3	1	13	16	69	0.0706	0.609
201211Orbi_Dave_Gelsample2	Uncategorized Sample	BioSample 1	S49 (F021046)	| Symbols: NDPK1 | Nucleoside diphosphate kinase family protein | chr4:5923424-5924366 FORWARD LENGTH=169	AT4G09320.1	TAIR10_pep_20101214_contaminants.fasta	18814.3	1	4	4	8	0.0168	0.207
201211Orbi_Dave_Gelsample2	Uncategorized Sample	BioSample 1	S50 (F021047)	| Symbols: NDPK1 | Nucleoside diphosphate kinase family protein | chr4:5923424-5924366 FORWARD LENGTH=169	AT4G09320.1	TAIR10_pep_20101214_contaminants.fasta	18814.3	0.999	2	2	3	0.00191	0.148
201211Orbi_Dave_Gelsample2	Uncategorized Sample	BioSample 1	S54 (F021051)	| Symbols: NDPK1 | Nucleoside diphosphate kinase family protein | chr4:5923424-5924366 FORWARD LENGTH=169	AT4G09320.1	TAIR10_pep_20101214_contaminants.fasta	18814.3	1	4	4	5	0.00545	0.207
201210Orbi_Dave_Gelsample (1)	Uncategorized Sample	BioSample 1	P63 (F020944)	| Symbols: ATPD | ATP synthase delta-subunit gene | chr4:6100799-6101503 FORWARD LENGTH=234	AT4G09650.1	TAIR10_pep_20101214_contaminants.fasta	25669.1	1	17	24	63	0.0534	0.662
201210Orbi_Dave_Gelsample (1)	Uncategorized Sample	BioSample 1	P64 (F020945)	| Symbols: ATPD | ATP synthase delta-subunit gene | chr4:6100799-6101503 FORWARD LENGTH=234	AT4G09650.1	TAIR10_pep_20101214_contaminants.fasta	25669.1	1	3	4	4	0.0041	0.222
201211Orbi_Dave_Gelsample2	Uncategorized Sample	BioSample 1	S39 (F021021)	| Symbols: ATPD | ATP synthase delta-subunit gene | chr4:6100799-6101503 FORWARD LENGTH=234	AT4G09650.1	TAIR10_pep_20101214_contaminants.fasta	25669.1	1	4	4	10	0.0093	0.162
201211Orbi_Dave_Gelsample2	Uncategorized Sample	BioSample 1	S43 (F021040)	| Symbols: ATPD | ATP synthase delta-subunit gene | chr4:6100799-6101503 FORWARD LENGTH=234	AT4G09650.1	TAIR10_pep_20101214_contaminants.fasta	25669.1	1	3	3	5	0.00672	0.128
201210Orbi_Dave_Gelsample (1)	Uncategorized Sample	BioSample 1	P15 (F020879)	| Symbols: LHCB5 | light harvesting complex of photosystem II 5 | chr4:6408200-6409496 FORWARD LENGTH=280	AT4G10340.1	TAIR10_pep_20101214_contaminants.fasta	30158.3	1	6	6	9	0.0066	0.304
201210Orbi_Dave_Gelsample (1)	Uncategorized Sample	BioSample 1	P41 (F020922)	| Symbols: LHCB5 | light harvesting complex of photosystem II 5 | chr4:6408200-6409496 FORWARD LENGTH=280	AT4G10340.1	TAIR10_pep_20101214_contaminants.fasta	30158.3	0.998	2	2	3	0.0022	0.0929
201210Orbi_Dave_Gelsample (1)	Uncategorized Sample	BioSample 1	P46 (F020927)	| Symbols: LHCB5 | light harvesting complex of photosystem II 5 | chr4:6408200-6409496 FORWARD LENGTH=280	AT4G10340.1	TAIR10_pep_20101214_contaminants.fasta	30158.3	1	3	3	5	0.0035	0.129
201210Orbi_Dave_Gelsample (1)	Uncategorized Sample	BioSample 1	P52 (F020933)	| Symbols: LHCB5 | light harvesting complex of photosystem II 5 | chr4:6408200-6409496 FORWARD LENGTH=280	AT4G10340.1	TAIR10_pep_20101214_contaminants.fasta	30158.3	1	3	3	3	0.0022	0.129
201210Orbi_Dave_Gelsample (1)	Uncategorized Sample	BioSample 1	P57 (F020938)	| Symbols: LHCB5 | light harvesting complex of photosystem II 5 | chr4:6408200-6409496 FORWARD LENGTH=280	AT4G10340.1	TAIR10_pep_20101214_contaminants.fasta	30158.3	1	4	4	6	0.0039	0.168
201210Orbi_Dave_Gelsample (1)	Uncategorized Sample	BioSample 1	P59 (F020940)	| Symbols: LHCB5 | light harvesting complex of photosystem II 5 | chr4:6408200-6409496 FORWARD LENGTH=280	AT4G10340.1	TAIR10_pep_20101214_contaminants.fasta	30158.3	1	3	3	3	0.0027	0.125
201211Orbi_Dave_Gelsample2	Uncategorized Sample	BioSample 1	S04 (F020980)	| Symbols: LHCB5 | light harvesting complex of photosystem II 5 | chr4:6408200-6409496 FORWARD LENGTH=280	AT4G10340.1	TAIR10_pep_20101214_contaminants.fasta	30158.3	1	6	6	12	0.00775	0.246
201211Orbi_Dave_Gelsample2	Uncategorized Sample	BioSample 1	S18 (F020994)	| Symbols: LHCB5 | light harvesting complex of photosystem II 5 | chr4:6408200-6409496 FORWARD LENGTH=280	AT4G10340.1	TAIR10_pep_20101214_contaminants.fasta	30158.3	1	2	2	3	0.00281	0.0679
201211Orbi_Dave_Gelsample2	Uncategorized Sample	BioSample 1	S24 (F021000)	| Symbols: LHCB5 | light harvesting complex of photosystem II 5 | chr4:6408200-6409496 FORWARD LENGTH=280	AT4G10340.1	TAIR10_pep_20101214_contaminants.fasta	30158.3	0.999	2	2	3	0.00208	0.0714
201211Orbi_Dave_Gelsample2	Uncategorized Sample	BioSample 1	S27 (F021003)	| Symbols: LHCB5 | light harvesting complex of photosystem II 5 | chr4:6408200-6409496 FORWARD LENGTH=280	AT4G10340.1	TAIR10_pep_20101214_contaminants.fasta	30158.3	1	7	8	17	0.0135	0.3
201211Orbi_Dave_Gelsample2	Uncategorized Sample	BioSample 1	S32 (F021014)	| Symbols: LHCB5 | light harvesting complex of photosystem II 5 | chr4:6408200-6409496 FORWARD LENGTH=280	AT4G10340.1	TAIR10_pep_20101214_contaminants.fasta	30158.3	1	4	4	6	0.00396	0.154
201210Orbi_Dave_Gelsample (1)	Uncategorized Sample	BioSample 1	P57 (F020938)	| Symbols: TUF, emb2448, TUFF, VHA-E1 | vacuolar ATP synthase subunit E1 | chr4:6800091-6801696 FORWARD LENGTH=230	AT4G11150.1	TAIR10_pep_20101214_contaminants.fasta	26060.4	1	10	11	19	0.0122	0.409
201211Orbi_Dave_Gelsample2	Uncategorized Sample	BioSample 1	S24 (F021000)	| Symbols: TUF, emb2448, TUFF, VHA-E1 | vacuolar ATP synthase subunit E1 | chr4:6800091-6801696 FORWARD LENGTH=230	AT4G11150.1	TAIR10_pep_20101214_contaminants.fasta	26060.4	1	4	4	7	0.00486	0.178
201211Orbi_Dave_Gelsample2	Uncategorized Sample	BioSample 1	S26 (F021002)	| Symbols: TUF, emb2448, TUFF, VHA-E1 | vacuolar ATP synthase subunit E1 | chr4:6800091-6801696 FORWARD LENGTH=230	AT4G11150.1	TAIR10_pep_20101214_contaminants.fasta	26060.4	1	14	16	39	0.0342	0.609
201210Orbi_Dave_Gelsample (1)	Uncategorized Sample	BioSample 1	P62 (F020943)	| Symbols: ATGPX6, PHGPX, LSC803, GPX6 | glutathione peroxidase 6 | chr4:7010021-7011330 REVERSE LENGTH=232	AT4G11600.1	TAIR10_pep_20101214_contaminants.fasta	25585.5	0.998	2	2	3	0.0024	0.103
201211Orbi_Dave_Gelsample2	Uncategorized Sample	BioSample 1	S38 (F021020)	| Symbols: ATGPX6, PHGPX, LSC803, GPX6 | glutathione peroxidase 6 | chr4:7010021-7011330 REVERSE LENGTH=232	AT4G11600.1	TAIR10_pep_20101214_contaminants.fasta	25585.5	1	6	6	11	0.0095	0.25
201210Orbi_Dave_Gelsample (1)	Uncategorized Sample	BioSample 1	P44 (F020925)	| Symbols: | ATP-dependent caseinolytic (Clp) protease/crotonase family protein | chr4:7775133-7777701 FORWARD LENGTH=421	AT4G13360.1	TAIR10_pep_20101214_contaminants.fasta	46252.6	1	3	3	4	0.0023	0.105
201211Orbi_Dave_Gelsample2	Uncategorized Sample	BioSample 1	S11 (F020987)	| Symbols: | ATP-dependent caseinolytic (Clp) protease/crotonase family protein | chr4:7775133-7777701 FORWARD LENGTH=421	AT4G13360.1	TAIR10_pep_20101214_contaminants.fasta	46252.6	1	13	14	25	0.0176	0.375
201210Orbi_Dave_Gelsample (1)	Uncategorized Sample	BioSample 1	P37 (F020918)	| Symbols: IIL1, ATLEUC1 | isopropyl malate isomerase large subunit 1 | chr4:7804194-7807789 REVERSE LENGTH=509	AT4G13430.1	TAIR10_pep_20101214_contaminants.fasta	55014.2	1	3	3	5	0.0036	0.0904
201211Orbi_Dave_Gelsample2	Uncategorized Sample	BioSample 1	S57 (F021054)	| Symbols: IIL1, ATLEUC1 | isopropyl malate isomerase large subunit 1 | chr4:7804194-7807789 REVERSE LENGTH=509	AT4G13430.1	TAIR10_pep_20101214_contaminants.fasta	55014.2	1	8	8	12	0.00766	0.2
201210Orbi_Dave_Gelsample (1)	Uncategorized Sample	BioSample 1	P25 (F020908)	| Symbols: | methionine--tRNA ligase, putative / methionyl-tRNA synthetase, putative / MetRS, putative | chr4:7993366-7998433 REVERSE LENGTH=797	AT4G13780.1	TAIR10_pep_20101214_contaminants.fasta	89855.4	1	23	30	48	0.0532	0.341
201210Orbi_Dave_Gelsample (1)	Uncategorized Sample	BioSample 1	P26 (F020909)	| Symbols: | methionine--tRNA ligase, putative / methionyl-tRNA synthetase, putative / MetRS, putative | chr4:7993366-7998433 REVERSE LENGTH=797	AT4G13780.1	TAIR10_pep_20101214_contaminants.fasta	89855.4	1	9	9	13	0.0142	0.162
201211Orbi_Dave_Gelsample2	Uncategorized Sample	BioSample 1	S03 (F020979)	| Symbols: | methionine--tRNA ligase, putative / methionyl-tRNA synthetase, putative / MetRS, putative | chr4:7993366-7998433 REVERSE LENGTH=797	AT4G13780.1	TAIR10_pep_20101214_contaminants.fasta	89855.4	1	2	2	2	0.00142	0.0326
201210Orbi_Dave_Gelsample (1)	Uncategorized Sample	BioSample 1	P24 (F020889)	| Symbols: | acylaminoacyl-peptidase-related | chr4:8362586-8366525 FORWARD LENGTH=764	AT4G14570.1	TAIR10_pep_20101214_contaminants.fasta	83939.6	1	4	4	7	0.0086	0.0838
201211Orbi_Dave_Gelsample2	Uncategorized Sample	BioSample 1	S02 (F020978)	| Symbols: | acylaminoacyl-peptidase-related | chr4:8362586-8366525 FORWARD LENGTH=764	AT4G14570.1	TAIR10_pep_20101214_contaminants.fasta	83939.6	1	4	4	7	0.00607	0.0798
201210Orbi_Dave_Gelsample (1)	Uncategorized Sample	BioSample 1	P46 (F020927)	| Symbols: | unknown protein; BEST Arabidopsis thaliana protein match is: unknown protein (TAIR:AT1G16520.1); Has 30201 Blast hits to 17322 proteins in 780 species: Archae - 12; Bacteria - 1396; Metazoa - 17338; Fungi - 3422; Plants - 5037; Viruses - 0; Other Eukaryotes - 2996 (source: NCBI BLink). | chr4:8875932-8877567 FORWARD LENGTH=337	AT4G15545.1	TAIR10_pep_20101214_contaminants.fasta	37207.3	1	10	11	31	0.0295	0.435
201211Orbi_Dave_Gelsample2	Uncategorized Sample	BioSample 1	S12 (F020988)	| Symbols: | unknown protein; BEST Arabidopsis thaliana protein match is: unknown protein (TAIR:AT1G16520.1); Has 30201 Blast hits to 17322 proteins in 780 species: Archae - 12; Bacteria - 1396; Metazoa - 17338; Fungi - 3422; Plants - 5037; Viruses - 0; Other Eukaryotes - 2996 (source: NCBI BLink). | chr4:8875932-8877567 FORWARD LENGTH=337	AT4G15545.1	TAIR10_pep_20101214_contaminants.fasta	37207.3	1	4	4	3	0.0033	0.177
201210Orbi_Dave_Gelsample (1)	Uncategorized Sample	BioSample 1	P37 (F020918)	| Symbols: | dihydrolipoyl dehydrogenases | chr4:9153570-9157322 REVERSE LENGTH=630	AT4G16155.1	TAIR10_pep_20101214_contaminants.fasta	67091.4	0.998	2	2	2	0.0015	0.0429
201211Orbi_Dave_Gelsample2	Uncategorized Sample	BioSample 1	S05 (F020981)	| Symbols: | dihydrolipoyl dehydrogenases | chr4:9153570-9157322 REVERSE LENGTH=630	AT4G16155.1	TAIR10_pep_20101214_contaminants.fasta	67091.4	1	8	8	14	0.00968	0.175
201210Orbi_Dave_Gelsample (1)	Uncategorized Sample	BioSample 1	P45 (F020926)	| Symbols: CHLI1, CH42, CH-42, CHL11, CHLI-1 | P-loop containing nucleoside triphosphate hydrolases superfamily protein | chr4:10201897-10203361 REVERSE LENGTH=424	AT4G18480.1	TAIR10_pep_20101214_contaminants.fasta	46270.8	1	7	10	19	0.0139	0.389
201211Orbi_Dave_Gelsample2	Uncategorized Sample	BioSample 1	S25 (F021001)	| Symbols: CHLI1, CH42, CH-42, CHL11, CHLI-1 | P-loop containing nucleoside triphosphate hydrolases superfamily protein | chr4:10201897-10203361 REVERSE LENGTH=424	AT4G18480.1	TAIR10_pep_20101214_contaminants.fasta	46270.8	1	3	3	4	0.00265	0.104
201210Orbi_Dave_Gelsample (1)	Uncategorized Sample	BioSample 1	P08 (F020969)	| Symbols: ATPCAP1, PCAP1 | plasma-membrane associated cation-binding protein 1 | chr4:10941593-10943227 FORWARD LENGTH=225	AT4G20260.1,AT4G20260.2,AT4G20260.3,AT4G20260.4	TAIR10_pep_20101214_contaminants.fasta	24583.2	1	9	9	16	0.0213	0.507
201210Orbi_Dave_Gelsample (1)	Uncategorized Sample	BioSample 1	P14 (F020965)	| Symbols: ATPCAP1, PCAP1 | plasma-membrane associated cation-binding protein 1 | chr4:10941593-10943227 FORWARD LENGTH=225	AT4G20260.1,AT4G20260.2,AT4G20260.3,AT4G20260.4	TAIR10_pep_20101214_contaminants.fasta	24583.2	1	13	15	24	0.0337	0.604
201210Orbi_Dave_Gelsample (1)	Uncategorized Sample	BioSample 1	P39 (F020920)	| Symbols: ATPCAP1, PCAP1 | plasma-membrane associated cation-binding protein 1 | chr4:10941593-10943227 FORWARD LENGTH=225	AT4G20260.1,AT4G20260.2,AT4G20260.3,AT4G20260.4	TAIR10_pep_20101214_contaminants.fasta	24583.2	0.998	2	2	3	0.002	0.102
201211Orbi_Dave_Gelsample2	Uncategorized Sample	BioSample 1	S18 (F020994)	| Symbols: ATPCAP1, PCAP1 | plasma-membrane associated cation-binding protein 1 | chr4:10941593-10943227 FORWARD LENGTH=225	AT4G20260.1,AT4G20260.2,AT4G20260.3,AT4G20260.4	TAIR10_pep_20101214_contaminants.fasta	24583.2	1	12	15	24	0.0225	0.591
201211Orbi_Dave_Gelsample2	Uncategorized Sample	BioSample 1	S51 (F021048)	| Symbols: ATPCAP1, PCAP1 | plasma-membrane associated cation-binding protein 1 | chr4:10941593-10943227 FORWARD LENGTH=225	AT4G20260.1,AT4G20260.2,AT4G20260.3,AT4G20260.4	TAIR10_pep_20101214_contaminants.fasta	24583.2	1	5	5	8	0.00636	0.262
201211Orbi_Dave_Gelsample2	Uncategorized Sample	BioSample 1	S58 (F021055)	| Symbols: ATPCAP1, PCAP1 | plasma-membrane associated cation-binding protein 1 | chr4:10941593-10943227 FORWARD LENGTH=225	AT4G20260.1,AT4G20260.2,AT4G20260.3,AT4G20260.4	TAIR10_pep_20101214_contaminants.fasta	24583.2	1	31	44	100	0.0798	0.791
201210Orbi_Dave_Gelsample (1)	Uncategorized Sample	BioSample 1	P12 (F020877)	| Symbols: ATRAB8D, ATRABE1B, RABE1b | RAB GTPase homolog E1B | chr4:10990036-10991466 FORWARD LENGTH=476	AT4G20360.1	TAIR10_pep_20101214_contaminants.fasta	51630.7	1	3	3	6	0.00396	0.189
201210Orbi_Dave_Gelsample (1)	Uncategorized Sample	BioSample 1	P39 (F020920)	| Symbols: ATRAB8D, ATRABE1B, RABE1b | RAB GTPase homolog E1B | chr4:10990036-10991466 FORWARD LENGTH=476	AT4G20360.1	TAIR10_pep_20101214_contaminants.fasta	51630.7	1	8	9	4	0.0045	0.0987
201210Orbi_Dave_Gelsample (1)	Uncategorized Sample	BioSample 1	P40 (F020921)	| Symbols: ATRAB8D, ATRABE1B, RABE1b | RAB GTPase homolog E1B | chr4:10990036-10991466 FORWARD LENGTH=476	AT4G20360.1	TAIR10_pep_20101214_contaminants.fasta	51630.7	0.998	2	2	16	0.0105	0.252
201210Orbi_Dave_Gelsample (1)	Uncategorized Sample	BioSample 1	P41 (F020922)	| Symbols: ATRAB8D, ATRABE1B, RABE1b | RAB GTPase homolog E1B | chr4:10990036-10991466 FORWARD LENGTH=476	AT4G20360.1	TAIR10_pep_20101214_contaminants.fasta	51630.7	1	3	4	3	0.0017	0.0588
201211Orbi_Dave_Gelsample2	Uncategorized Sample	BioSample 1	S18 (F020994)	| Symbols: ATRAB8D, ATRABE1B, RABE1b | RAB GTPase homolog E1B | chr4:10990036-10991466 FORWARD LENGTH=476	AT4G20360.1	TAIR10_pep_20101214_contaminants.fasta	51630.7	1	5	6	13	0.0122	0.137
201211Orbi_Dave_Gelsample2	Uncategorized Sample	BioSample 1	S22 (F020998)	| Symbols: ATRAB8D, ATRABE1B, RABE1b | RAB GTPase homolog E1B | chr4:10990036-10991466 FORWARD LENGTH=476	AT4G20360.1	TAIR10_pep_20101214_contaminants.fasta	51630.7	0.999	2	2	6	0.00464	0.0483
201211Orbi_Dave_Gelsample2	Uncategorized Sample	BioSample 1	S28 (F021004)	| Symbols: ATRAB8D, ATRABE1B, RABE1b | RAB GTPase homolog E1B | chr4:10990036-10991466 FORWARD LENGTH=476	AT4G20360.1	TAIR10_pep_20101214_contaminants.fasta	51630.7	1	3	3	4	0.00301	0.0819
201211Orbi_Dave_Gelsample2	Uncategorized Sample	BioSample 1	S50 (F021047)	| Symbols: ATRAB8D, ATRABE1B, RABE1b | RAB GTPase homolog E1B | chr4:10990036-10991466 FORWARD LENGTH=476	AT4G20360.1	TAIR10_pep_20101214_contaminants.fasta	51630.7	1	9	10	3	0.00279	0.134
201210Orbi_Dave_Gelsample (1)	Uncategorized Sample	BioSample 1	P27 (F020910)	| Symbols: | Eukaryotic translation initiation factor 3 subunit 7 (eIF-3) | chr4:11216997-11218772 FORWARD LENGTH=591	AT4G20980.1,AT4G20980.2,AT4G20980.3,AT4G20980.4	TAIR10_pep_20101214_contaminants.fasta	66725.5	1	11	14	21	0.014	0.247
201210Orbi_Dave_Gelsample (1)	Uncategorized Sample	BioSample 1	P28 (F020911)	| Symbols: | Eukaryotic translation initiation factor 3 subunit 7 (eIF-3) | chr4:11216997-11218772 FORWARD LENGTH=591	AT4G20980.1,AT4G20980.2,AT4G20980.3,AT4G20980.4	TAIR10_pep_20101214_contaminants.fasta	66725.5	1	16	19	32	0.0215	0.359
201210Orbi_Dave_Gelsample (1)	Uncategorized Sample	BioSample 1	P38 (F020919)	| Symbols: CORI3, JR2 | Tyrosine transaminase family protein | chr4:12310657-12312885 FORWARD LENGTH=422	AT4G23600.1	TAIR10_pep_20101214_contaminants.fasta	47040.7	1	13	17	28	0.0194	0.398
201210Orbi_Dave_Gelsample (1)	Uncategorized Sample	BioSample 1	P40 (F020921)	| Symbols: CORI3, JR2 | Tyrosine transaminase family protein | chr4:12310657-12312885 FORWARD LENGTH=422	AT4G23600.1	TAIR10_pep_20101214_contaminants.fasta	47040.7	1	5	5	7	0.0039	0.13
201210Orbi_Dave_Gelsample (1)	Uncategorized Sample	BioSample 1	P43 (F020924)	| Symbols: CORI3, JR2 | Tyrosine transaminase family protein | chr4:12310657-12312885 FORWARD LENGTH=422	AT4G23600.1	TAIR10_pep_20101214_contaminants.fasta	47040.7	0.998	2	2	2	0.0011	0.0521
201211Orbi_Dave_Gelsample2	Uncategorized Sample	BioSample 1	S55 (F021052)	| Symbols: CORI3, JR2 | Tyrosine transaminase family protein | chr4:12310657-12312885 FORWARD LENGTH=422	AT4G23600.1	TAIR10_pep_20101214_contaminants.fasta	47040.7	1	13	16	29	0.0195	0.396
201210Orbi_Dave_Gelsample (1)	Uncategorized Sample	BioSample 1	P70 (F020951)	| Symbols: | Polyketide cyclase/dehydrase and lipid transport superfamily protein | chr4:12332846-12333656 REVERSE LENGTH=151	AT4G23670.1	TAIR10_pep_20101214_contaminants.fasta	17517.6	1	9	11	23	0.0263	0.43
201210Orbi_Dave_Gelsample (1)	Uncategorized Sample	BioSample 1	P71 (F020952)	| Symbols: | Polyketide cyclase/dehydrase and lipid transport superfamily protein | chr4:12332846-12333656 REVERSE LENGTH=151	AT4G23670.1	TAIR10_pep_20101214_contaminants.fasta	17517.6	1	14	19	21	0.0213	0.364
201210Orbi_Dave_Gelsample (1)	Uncategorized Sample	BioSample 1	P72 (F020953)	| Symbols: | Polyketide cyclase/dehydrase and lipid transport superfamily protein | chr4:12332846-12333656 REVERSE LENGTH=151	AT4G23670.1	TAIR10_pep_20101214_contaminants.fasta	17517.6	1	7	10	3	0.00396	0.238
201211Orbi_Dave_Gelsample2	Uncategorized Sample	BioSample 1	S45 (F021042)	| Symbols: | Polyketide cyclase/dehydrase and lipid transport superfamily protein | chr4:12332846-12333656 REVERSE LENGTH=151	AT4G23670.1	TAIR10_pep_20101214_contaminants.fasta	17517.6	1	13	19	20	0.0155	0.483
201211Orbi_Dave_Gelsample2	Uncategorized Sample	BioSample 1	S59 (F021056)	| Symbols: | Polyketide cyclase/dehydrase and lipid transport superfamily protein | chr4:12332846-12333656 REVERSE LENGTH=151	AT4G23670.1	TAIR10_pep_20101214_contaminants.fasta	17517.6	1	3	3	19	0.0195	0.55
201210Orbi_Dave_Gelsample (1)	Uncategorized Sample	BioSample 1	P70 (F020951)	| Symbols: | Polyketide cyclase/dehydrase and lipid transport superfamily protein | chr4:12336416-12337417 REVERSE LENGTH=151	AT4G23680.1	TAIR10_pep_20101214_contaminants.fasta	17473.4	1	5	6	50	0.0387	0.563
201210Orbi_Dave_Gelsample (1)	Uncategorized Sample	BioSample 1	P71 (F020952)	| Symbols: | Polyketide cyclase/dehydrase and lipid transport superfamily protein | chr4:12336416-12337417 REVERSE LENGTH=151	AT4G23680.1	TAIR10_pep_20101214_contaminants.fasta	17473.4	1	7	9	80	0.0823	0.649
201210Orbi_Dave_Gelsample (1)	Uncategorized Sample	BioSample 1	P72 (F020953)	| Symbols: | Polyketide cyclase/dehydrase and lipid transport superfamily protein | chr4:12336416-12337417 REVERSE LENGTH=151	AT4G23680.1	TAIR10_pep_20101214_contaminants.fasta	17473.4	1	5	5	17	0.0195	0.278
201211Orbi_Dave_Gelsample2	Uncategorized Sample	BioSample 1	S45 (F021042)	| Symbols: | Polyketide cyclase/dehydrase and lipid transport superfamily protein | chr4:12336416-12337417 REVERSE LENGTH=151	AT4G23680.1	TAIR10_pep_20101214_contaminants.fasta	17473.4	1	7	9	9	0.0091	0.278
201210Orbi_Dave_Gelsample (1)	Uncategorized Sample	BioSample 1	P60 (F020941)	| Symbols: FSD1, ATFSD1 | Fe superoxide dismutase 1 | chr4:12884649-12886501 REVERSE LENGTH=212	AT4G25100.1,AT4G25100.2,AT4G25100.3,AT4G25100.4,AT4G25100.5	TAIR10_pep_20101214_contaminants.fasta	23791.5	1	2	2	26	0.022	0.212
201211Orbi_Dave_Gelsample2	Uncategorized Sample	BioSample 1	S33 (F021015)	| Symbols: FSD1, ATFSD1 | Fe superoxide dismutase 1 | chr4:12884649-12886501 REVERSE LENGTH=212	AT4G25100.1,AT4G25100.2,AT4G25100.3,AT4G25100.4,AT4G25100.5	TAIR10_pep_20101214_contaminants.fasta	23791.5	1	4	6	5	0.00389	0.108
201211Orbi_Dave_Gelsample2	Uncategorized Sample	BioSample 1	S34 (F021016)	| Symbols: FSD1, ATFSD1 | Fe superoxide dismutase 1 | chr4:12884649-12886501 REVERSE LENGTH=212	AT4G25100.1,AT4G25100.2,AT4G25100.3,AT4G25100.4,AT4G25100.5	TAIR10_pep_20101214_contaminants.fasta	23791.5	1	6	8	2	0.00157	0.0613
201211Orbi_Dave_Gelsample2	Uncategorized Sample	BioSample 1	S35 (F021017)	| Symbols: FSD1, ATFSD1 | Fe superoxide dismutase 1 | chr4:12884649-12886501 REVERSE LENGTH=212	AT4G25100.1,AT4G25100.2,AT4G25100.3,AT4G25100.4,AT4G25100.5	TAIR10_pep_20101214_contaminants.fasta	23791.5	1	3	3	15	0.0127	0.197
201211Orbi_Dave_Gelsample2	Uncategorized Sample	BioSample 1	S37 (F021019)	| Symbols: FSD1, ATFSD1 | Fe superoxide dismutase 1 | chr4:12884649-12886501 REVERSE LENGTH=212	AT4G25100.1,AT4G25100.2,AT4G25100.3,AT4G25100.4,AT4G25100.5	TAIR10_pep_20101214_contaminants.fasta	23791.5	0.999	2	2	22	0.0196	0.297
201210Orbi_Dave_Gelsample (1)	Uncategorized Sample	BioSample 1	P65 (F020946)	| Symbols: | Double Clp-N motif protein | chr4:12972747-12974580 FORWARD LENGTH=238	AT4G25370.1	TAIR10_pep_20101214_contaminants.fasta	26051.1	1	12	15	33	0.0275	0.483
201211Orbi_Dave_Gelsample2	Uncategorized Sample	BioSample 1	S44 (F021041)	| Symbols: | Double Clp-N motif protein | chr4:12972747-12974580 FORWARD LENGTH=238	AT4G25370.1	TAIR10_pep_20101214_contaminants.fasta	26051.1	1	7	8	15	0.0174	0.248
201210Orbi_Dave_Gelsample (1)	Uncategorized Sample	BioSample 1	P29 (F020912)	| Symbols: emb1027 | Arginyl-tRNA synthetase, class Ic | chr4:13308400-13313109 REVERSE LENGTH=642	AT4G26300.1	TAIR10_pep_20101214_contaminants.fasta	72388.7	1	9	10	13	0.0076	0.151
201211Orbi_Dave_Gelsample2	Uncategorized Sample	BioSample 1	S08 (F020984)	| Symbols: emb1027 | Arginyl-tRNA synthetase, class Ic | chr4:13308400-13313109 REVERSE LENGTH=642	AT4G26300.1	TAIR10_pep_20101214_contaminants.fasta	72388.7	1	7	7	12	0.00792	0.103
201211Orbi_Dave_Gelsample2	Uncategorized Sample	BioSample 1	S09 (F020985)	| Symbols: emb1027 | Arginyl-tRNA synthetase, class Ic | chr4:13308400-13313109 REVERSE LENGTH=642	AT4G26300.1	TAIR10_pep_20101214_contaminants.fasta	72388.7	1	12	15	26	0.0172	0.199
201210Orbi_Dave_Gelsample (1)	Uncategorized Sample	BioSample 1	P46 (F020927)	| Symbols: AR192 | Co-chaperone GrpE family protein | chr4:13485066-13486560 REVERSE LENGTH=327	AT4G26780.1	TAIR10_pep_20101214_contaminants.fasta	36116.6	0.999	2	2	2	0.0014	0.0673
201211Orbi_Dave_Gelsample2	Uncategorized Sample	BioSample 1	S15 (F020991)	| Symbols: AR192 | Co-chaperone GrpE family protein | chr4:13485066-13486560 REVERSE LENGTH=327	AT4G26780.1	TAIR10_pep_20101214_contaminants.fasta	36116.6	1	7	7	19	0.0226	0.232
201210Orbi_Dave_Gelsample (1)	Uncategorized Sample	BioSample 1	P43 (F020924)	| Symbols: | pfkB-like carbohydrate kinase family protein | chr4:14167805-14170619 FORWARD LENGTH=401	AT4G28706.1,AT4G28706.2,AT4G28706.3,AT4G28706.4	TAIR10_pep_20101214_contaminants.fasta	43080.5	0.998	2	2	40	0.0282	0.5
201210Orbi_Dave_Gelsample (1)	Uncategorized Sample	BioSample 1	P44 (F020925)	| Symbols: | pfkB-like carbohydrate kinase family protein | chr4:14167805-14170619 FORWARD LENGTH=401	AT4G28706.1,AT4G28706.2,AT4G28706.3,AT4G28706.4	TAIR10_pep_20101214_contaminants.fasta	43080.5	1	4	4	5	0.00397	0.138
201211Orbi_Dave_Gelsample2	Uncategorized Sample	BioSample 1	S50 (F021047)	| Symbols: | pfkB-like carbohydrate kinase family protein | chr4:14167805-14170619 FORWARD LENGTH=401	AT4G28706.1,AT4G28706.2,AT4G28706.3,AT4G28706.4	TAIR10_pep_20101214_contaminants.fasta	43080.5	1	3	3	5	0.0028	0.127
201210Orbi_Dave_Gelsample (1)	Uncategorized Sample	BioSample 1	P49 (F020930)	| Symbols: VIP3 | Transducin/WD40 repeat-like superfamily protein | chr4:14597728-14599157 FORWARD LENGTH=321	AT4G29830.1	TAIR10_pep_20101214_contaminants.fasta	34259.8	1	12	18	36	0.0216	0.576
201211Orbi_Dave_Gelsample2	Uncategorized Sample	BioSample 1	S17 (F020993)	| Symbols: VIP3 | Transducin/WD40 repeat-like superfamily protein | chr4:14597728-14599157 FORWARD LENGTH=321	AT4G29830.1	TAIR10_pep_20101214_contaminants.fasta	34259.8	1	2	2	3	0.00211	0.0779
201210Orbi_Dave_Gelsample (1)	Uncategorized Sample	BioSample 1	P34 (F020916)	| Symbols: MTO2, TS | Pyridoxal-5'-phosphate-dependent enzyme family protein | chr4:14599434-14601014 REVERSE LENGTH=526	AT4G29840.1	TAIR10_pep_20101214_contaminants.fasta	57778	0.998	2	3	3	0.0025	0.057
201210Orbi_Dave_Gelsample (1)	Uncategorized Sample	BioSample 1	P37 (F020918)	| Symbols: MTO2, TS | Pyridoxal-5'-phosphate-dependent enzyme family protein | chr4:14599434-14601014 REVERSE LENGTH=526	AT4G29840.1	TAIR10_pep_20101214_contaminants.fasta	57778	1	3	3	5	0.0036	0.0779
201211Orbi_Dave_Gelsample2	Uncategorized Sample	BioSample 1	S57 (F021054)	| Symbols: MTO2, TS | Pyridoxal-5'-phosphate-dependent enzyme family protein | chr4:14599434-14601014 REVERSE LENGTH=526	AT4G29840.1	TAIR10_pep_20101214_contaminants.fasta	57778	1	15	15	31	0.0198	0.327
201210Orbi_Dave_Gelsample (1)	Uncategorized Sample	BioSample 1	P33 (F020915)	| Symbols: | FGGY family of carbohydrate kinase | chr4:14831913-14834798 FORWARD LENGTH=499	AT4G30310.1,AT4G30310.2	TAIR10_pep_20101214_contaminants.fasta	53995.4	1	3	3	4	0.0028	0.0862
201211Orbi_Dave_Gelsample2	Uncategorized Sample	BioSample 1	S08 (F020984)	| Symbols: | FGGY family of carbohydrate kinase | chr4:14831913-14835092 FORWARD LENGTH=579	AT4G30310.2	TAIR10_pep_20101214_contaminants.fasta	62552.5	1	12	13	22	0.0145	0.264
201210Orbi_Dave_Gelsample (1)	Uncategorized Sample	BioSample 1	P43 (F020924)	| Symbols: AGD2 | Pyridoxal phosphate (PLP)-dependent transferases superfamily protein | chr4:16171847-16174630 REVERSE LENGTH=461	AT4G33680.1	TAIR10_pep_20101214_contaminants.fasta	50397.2	1	4	4	5	0.0026	0.137
201210Orbi_Dave_Gelsample (1)	Uncategorized Sample	BioSample 1	P44 (F020925)	| Symbols: AGD2 | Pyridoxal phosphate (PLP)-dependent transferases superfamily protein | chr4:16171847-16174630 REVERSE LENGTH=461	AT4G33680.1	TAIR10_pep_20101214_contaminants.fasta	50397.2	1	5	5	10	0.0057	0.178
201211Orbi_Dave_Gelsample2	Uncategorized Sample	BioSample 1	S55 (F021052)	| Symbols: AGD2 | Pyridoxal phosphate (PLP)-dependent transferases superfamily protein | chr4:16171847-16174630 REVERSE LENGTH=461	AT4G33680.1	TAIR10_pep_20101214_contaminants.fasta	50397.2	1	3	3	4	0.00269	0.0672
201210Orbi_Dave_Gelsample (1)	Uncategorized Sample	BioSample 1	P57 (F020938)	| Symbols: | Domain of unknown function (DUF303) | chr4:16380203-16381192 REVERSE LENGTH=260	AT4G34215.1,AT4G34215.2	TAIR10_pep_20101214_contaminants.fasta	28358.6	1	6	6	9	0.0058	0.35
201211Orbi_Dave_Gelsample2	Uncategorized Sample	BioSample 1	S24 (F021000)	| Symbols: | Domain of unknown function (DUF303) | chr4:16380203-16381192 REVERSE LENGTH=260	AT4G34215.1,AT4G34215.2	TAIR10_pep_20101214_contaminants.fasta	28358.6	1	5	6	11	0.00763	0.254
201210Orbi_Dave_Gelsample (1)	Uncategorized Sample	BioSample 1	P37 (F020918)	| Symbols: ATCAP1, CAP 1, CAP1 | cyclase associated protein 1 | chr4:16484896-16487355 REVERSE LENGTH=476	AT4G34490.1	TAIR10_pep_20101214_contaminants.fasta	50969.8	1	26	32	57	0.0415	0.586
201211Orbi_Dave_Gelsample2	Uncategorized Sample	BioSample 1	S05 (F020981)	| Symbols: ATCAP1, CAP 1, CAP1 | cyclase associated protein 1 | chr4:16484896-16487355 REVERSE LENGTH=476	AT4G34490.1	TAIR10_pep_20101214_contaminants.fasta	50969.8	1	10	10	15	0.0104	0.193
201211Orbi_Dave_Gelsample2	Uncategorized Sample	BioSample 1	S57 (F021054)	| Symbols: ATCAP1, CAP 1, CAP1 | cyclase associated protein 1 | chr4:16484896-16487355 REVERSE LENGTH=476	AT4G34490.1	TAIR10_pep_20101214_contaminants.fasta	50969.8	1	14	14	21	0.0134	0.315
201210Orbi_Dave_Gelsample (1)	Uncategorized Sample	BioSample 1	P37 (F020918)	| Symbols: ATASE2, CIA1, ATPURF2, ASE2 | GLN phosphoribosyl pyrophosphate amidotransferase 2 | chr4:16574894-16576579 REVERSE LENGTH=561	AT4G34740.1	TAIR10_pep_20101214_contaminants.fasta	61030.5	1	4	4	5	0.0036	0.127
201211Orbi_Dave_Gelsample2	Uncategorized Sample	BioSample 1	S57 (F021054)	| Symbols: ATASE2, CIA1, ATPURF2, ASE2 | GLN phosphoribosyl pyrophosphate amidotransferase 2 | chr4:16574894-16576579 REVERSE LENGTH=561	AT4G34740.1	TAIR10_pep_20101214_contaminants.fasta	61030.5	1	10	10	19	0.0121	0.198
201210Orbi_Dave_Gelsample (1)	Uncategorized Sample	BioSample 1	P25 (F020908)	| Symbols: CAT2 | catalase 2 | chr4:16700937-16703215 REVERSE LENGTH=492	AT4G35090.1	TAIR10_pep_20101214_contaminants.fasta	56932.5	1	3	3	4	0.0044	0.0549
201210Orbi_Dave_Gelsample (1)	Uncategorized Sample	BioSample 1	P37 (F020918)	| Symbols: CAT2 | catalase 2 | chr4:16700937-16703215 REVERSE LENGTH=492	AT4G35090.1	TAIR10_pep_20101214_contaminants.fasta	56932.5	0.998	2	3	4	0.0029	0.0549
201210Orbi_Dave_Gelsample (1)	Uncategorized Sample	BioSample 1	P43 (F020924)	| Symbols: CAT2 | catalase 2 | chr4:16700937-16703215 REVERSE LENGTH=492	AT4G35090.1	TAIR10_pep_20101214_contaminants.fasta	56932.5	1	5	5	7	0.0037	0.112
201210Orbi_Dave_Gelsample (1)	Uncategorized Sample	BioSample 1	P49 (F020930)	| Symbols: CAT2 | catalase 2 | chr4:16700937-16703215 REVERSE LENGTH=492	AT4G35090.1	TAIR10_pep_20101214_contaminants.fasta	56932.5	0.998	2	2	3	0.0018	0.0407
201210Orbi_Dave_Gelsample (1)	Uncategorized Sample	BioSample 1	P54 (F020935)	| Symbols: CAT2 | catalase 2 | chr4:16700937-16703215 REVERSE LENGTH=492	AT4G35090.1	TAIR10_pep_20101214_contaminants.fasta	56932.5	1	6	6	9	0.0071	0.14
201210Orbi_Dave_Gelsample (1)	Uncategorized Sample	BioSample 1	P58 (F020939)	| Symbols: CAT2 | catalase 2 | chr4:16700937-16703215 REVERSE LENGTH=492	AT4G35090.1	TAIR10_pep_20101214_contaminants.fasta	56932.5	0.998	2	2	2	0.0015	0.0407
201211Orbi_Dave_Gelsample2	Uncategorized Sample	BioSample 1	S26 (F021002)	| Symbols: CAT2 | catalase 2 | chr4:16700937-16703215 REVERSE LENGTH=492	AT4G35090.1,AT4G35090.2	TAIR10_pep_20101214_contaminants.fasta	56932.5	1	3	3	4	0.00351	0.0671
201210Orbi_Dave_Gelsample (1)	Uncategorized Sample	BioSample 1	P47 (F020928)	| Symbols: | NAD(P)-binding Rossmann-fold superfamily protein | chr4:16771401-16773269 REVERSE LENGTH=395	AT4G35250.1	TAIR10_pep_20101214_contaminants.fasta	43723.8	1	4	4	14	0.0123	0.307
201210Orbi_Dave_Gelsample (1)	Uncategorized Sample	BioSample 1	P49 (F020930)	| Symbols: | NAD(P)-binding Rossmann-fold superfamily protein | chr4:16771401-16773269 REVERSE LENGTH=395	AT4G35250.1	TAIR10_pep_20101214_contaminants.fasta	43723.8	1	3	3	3	0.0019	0.0436
201211Orbi_Dave_Gelsample2	Uncategorized Sample	BioSample 1	S17 (F020993)	| Symbols: | NAD(P)-binding Rossmann-fold superfamily protein | chr4:16771401-16773269 REVERSE LENGTH=395	AT4G35250.1	TAIR10_pep_20101214_contaminants.fasta	43723.8	1	5	5	2	0.0014	0.0611
201210Orbi_Dave_Gelsample (1)	Uncategorized Sample	BioSample 1	P48 (F020929)	| Symbols: | alpha/beta-Hydrolases superfamily protein | chr4:17240120-17241518 REVERSE LENGTH=321	AT4G36530.1,AT4G36530.2	TAIR10_pep_20101214_contaminants.fasta	35777.1	1	7	7	11	0.0082	0.249
201211Orbi_Dave_Gelsample2	Uncategorized Sample	BioSample 1	S14 (F020990)	| Symbols: | alpha/beta-Hydrolases superfamily protein | chr4:17240120-17241518 REVERSE LENGTH=321	AT4G36530.1,AT4G36530.2	TAIR10_pep_20101214_contaminants.fasta	35777.1	1	3	3	5	0.00377	0.0748
201210Orbi_Dave_Gelsample (1)	Uncategorized Sample	BioSample 1	P49 (F020930)	| Symbols: MAP1D | methionine aminopeptidase 1D | chr4:17455175-17457085 FORWARD LENGTH=350	AT4G37040.1	TAIR10_pep_20101214_contaminants.fasta	38532.4	1	3	3	5	0.00352	0.109
201211Orbi_Dave_Gelsample2	Uncategorized Sample	BioSample 1	S16 (F020992)	| Symbols: MAP1D | methionine aminopeptidase 1D | chr4:17455175-17457085 FORWARD LENGTH=350	AT4G37040.1	TAIR10_pep_20101214_contaminants.fasta	38532.4	1	8	9	21	0.0145	0.418
201211Orbi_Dave_Gelsample2	Uncategorized Sample	BioSample 1	S17 (F020993)	| Symbols: MAP1D | methionine aminopeptidase 1D | chr4:17455175-17457085 FORWARD LENGTH=350	AT4G37040.1	TAIR10_pep_20101214_contaminants.fasta	38532.4	1	4	4	17	0.0095	0.223
201210Orbi_Dave_Gelsample (1)	Uncategorized Sample	BioSample 1	P37 (F020918)	| Symbols: SHM1, STM, SHMT1 | serine transhydroxymethyltransferase 1 | chr4:17831891-17834742 REVERSE LENGTH=517	AT4G37930.1	TAIR10_pep_20101214_contaminants.fasta	57401.7	1	17	21	43	0.0313	0.489
201211Orbi_Dave_Gelsample2	Uncategorized Sample	BioSample 1	S05 (F020981)	| Symbols: SHM1, STM, SHMT1 | serine transhydroxymethyltransferase 1 | chr4:17831891-17834742 REVERSE LENGTH=517	AT4G37930.1	TAIR10_pep_20101214_contaminants.fasta	57401.7	1	2	2	27	0.0172	0.267
201211Orbi_Dave_Gelsample2	Uncategorized Sample	BioSample 1	S57 (F021054)	| Symbols: SHM1, STM, SHMT1 | serine transhydroxymethyltransferase 1 | chr4:17831891-17834742 REVERSE LENGTH=517	AT4G37930.1	TAIR10_pep_20101214_contaminants.fasta	57401.7	1	15	15	2	0.0015	0.0531
201210Orbi_Dave_Gelsample (1)	Uncategorized Sample	BioSample 1	P38 (F020919)	| Symbols: | Peptidase M20/M25/M40 family protein | chr4:17925251-17926919 FORWARD LENGTH=430	AT4G38220.1,AT4G38220.2	TAIR10_pep_20101214_contaminants.fasta	47740.9	1	15	17	33	0.0228	0.474
201210Orbi_Dave_Gelsample (1)	Uncategorized Sample	BioSample 1	P40 (F020921)	| Symbols: | Peptidase M20/M25/M40 family protein | chr4:17925251-17926919 FORWARD LENGTH=430	AT4G38220.1,AT4G38220.2	TAIR10_pep_20101214_contaminants.fasta	47740.9	1	3	3	6	0.0031	0.128
201210Orbi_Dave_Gelsample (1)	Uncategorized Sample	BioSample 1	P43 (F020924)	| Symbols: | Peptidase M20/M25/M40 family protein | chr4:17925251-17926919 FORWARD LENGTH=430	AT4G38220.1,AT4G38220.2	TAIR10_pep_20101214_contaminants.fasta	47740.9	1	5	5	10	0.008	0.16
201210Orbi_Dave_Gelsample (1)	Uncategorized Sample	BioSample 1	P62 (F020943)	| Symbols: | Peptidase M20/M25/M40 family protein | chr4:17925251-17926919 FORWARD LENGTH=430	AT4G38220.1,AT4G38220.2	TAIR10_pep_20101214_contaminants.fasta	47740.9	1	6	6	83	0.0559	0.472
201211Orbi_Dave_Gelsample2	Uncategorized Sample	BioSample 1	S55 (F021052)	| Symbols: | Peptidase M20/M25/M40 family protein | chr4:17925251-17926919 FORWARD LENGTH=430	AT4G38220.1,AT4G38220.2	TAIR10_pep_20101214_contaminants.fasta	47740.9	1	22	33	3	0.00251	0.0884
201211Orbi_Dave_Gelsample2	Uncategorized Sample	BioSample 1	S56 (F021053)	| Symbols: | Peptidase M20/M25/M40 family protein | chr4:17925251-17926919 FORWARD LENGTH=430	AT4G38220.1,AT4G38220.2	TAIR10_pep_20101214_contaminants.fasta	47740.9	1	3	3	12	0.0079	0.193
201210Orbi_Dave_Gelsample (1)	Uncategorized Sample	BioSample 1	P46 (F020927)	| Symbols: FBA2 | fructose-bisphosphate aldolase 2 | chr4:18163714-18165659 REVERSE LENGTH=398	AT4G38970.1	TAIR10_pep_20101214_contaminants.fasta	42988.1	0.998	2	2	52	0.0389	0.596
201210Orbi_Dave_Gelsample (1)	Uncategorized Sample	BioSample 1	P48 (F020929)	| Symbols: FBA2 | fructose-bisphosphate aldolase 2 | chr4:18163714-18165659 REVERSE LENGTH=398	AT4G38970.1	TAIR10_pep_20101214_contaminants.fasta	42988.1	1	9	12	36	0.0271	0.519
201210Orbi_Dave_Gelsample (1)	Uncategorized Sample	BioSample 1	P50 (F020931)	| Symbols: FBA2 | fructose-bisphosphate aldolase 2 | chr4:18163714-18165659 REVERSE LENGTH=398	AT4G38970.1	TAIR10_pep_20101214_contaminants.fasta	42988.1	0.999	2	2	3	0.0021	0.133
201211Orbi_Dave_Gelsample2	Uncategorized Sample	BioSample 1	S01 (F020977)	| Symbols: FBA2 | fructose-bisphosphate aldolase 2 | chr4:18163714-18165659 REVERSE LENGTH=398	AT4G38970.1	TAIR10_pep_20101214_contaminants.fasta	42988.1	1	11	12	3	0.0019	0.118
201211Orbi_Dave_Gelsample2	Uncategorized Sample	BioSample 1	S04 (F020980)	| Symbols: FBA2 | fructose-bisphosphate aldolase 2 | chr4:18163714-18165659 REVERSE LENGTH=398	AT4G38970.1	TAIR10_pep_20101214_contaminants.fasta	42988.1	1	5	5	34	0.0398	0.334
201211Orbi_Dave_Gelsample2	Uncategorized Sample	BioSample 1	S14 (F020990)	| Symbols: FBA2 | fructose-bisphosphate aldolase 2 | chr4:18163714-18165659 REVERSE LENGTH=398	AT4G38970.1	TAIR10_pep_20101214_contaminants.fasta	42988.1	1	18	22	52	0.0392	0.52
201211Orbi_Dave_Gelsample2	Uncategorized Sample	BioSample 1	S25 (F021001)	| Symbols: FBA2 | fructose-bisphosphate aldolase 2 | chr4:18163714-18165659 REVERSE LENGTH=398	AT4G38970.1	TAIR10_pep_20101214_contaminants.fasta	42988.1	1	6	6	9	0.00595	0.168
201210Orbi_Dave_Gelsample (1)	Uncategorized Sample	BioSample 1	P43 (F020924)	| Symbols: ATCAD9, CAD9 | cinnamyl alcohol dehydrogenase 9 | chr4:18291268-18292772 FORWARD LENGTH=360	AT4G39330.1	TAIR10_pep_20101214_contaminants.fasta	38934.2	1	3	3	4	0.0021	0.114
201211Orbi_Dave_Gelsample2	Uncategorized Sample	BioSample 1	S52 (F021049)	| Symbols: ATCAD9, CAD9 | cinnamyl alcohol dehydrogenase 9 | chr4:18291268-18292772 FORWARD LENGTH=360	AT4G39330.1	TAIR10_pep_20101214_contaminants.fasta	38934.2	1	5	5	8	0.00498	0.2
201210Orbi_Dave_Gelsample (1)	Uncategorized Sample	BioSample 1	P53 (F020934)	| Symbols: PDX1, ATPDX1.3, RSR4, PDX1.3, ATPDX1 | Aldolase-type TIM barrel family protein | chr5:172576-173505 REVERSE LENGTH=309	AT5G01410.1	TAIR10_pep_20101214_contaminants.fasta	33215.9	1	4	5	7	0.0046	0.301
201210Orbi_Dave_Gelsample (1)	Uncategorized Sample	BioSample 1	P55 (F020936)	| Symbols: PDX1, ATPDX1.3, RSR4, PDX1.3, ATPDX1 | Aldolase-type TIM barrel family protein | chr5:172576-173505 REVERSE LENGTH=309	AT5G01410.1	TAIR10_pep_20101214_contaminants.fasta	33215.9	1	5	7	12	0.0096	0.275
201211Orbi_Dave_Gelsample2	Uncategorized Sample	BioSample 1	S20 (F020996)	| Symbols: PDX1, ATPDX1.3, RSR4, PDX1.3, ATPDX1 | Aldolase-type TIM barrel family protein | chr5:172576-173505 REVERSE LENGTH=309	AT5G01410.1	TAIR10_pep_20101214_contaminants.fasta	33215.9	1	3	3	4	0.00303	0.117
201211Orbi_Dave_Gelsample2	Uncategorized Sample	BioSample 1	S21 (F020997)	| Symbols: PDX1, ATPDX1.3, RSR4, PDX1.3, ATPDX1 | Aldolase-type TIM barrel family protein | chr5:172576-173505 REVERSE LENGTH=309	AT5G01410.1	TAIR10_pep_20101214_contaminants.fasta	33215.9	1	12	15	50	0.0382	0.356
201210Orbi_Dave_Gelsample (1)	Uncategorized Sample	BioSample 1	P15 (F020879)	| Symbols: GSTL3 | Glutathione S-transferase family protein | chr5:632877-634858 FORWARD LENGTH=235	AT5G02790.1	TAIR10_pep_20101214_contaminants.fasta	27091.6	1	18	20	34	0.0251	0.749
201211Orbi_Dave_Gelsample2	Uncategorized Sample	BioSample 1	S27 (F021003)	| Symbols: GSTL3 | Glutathione S-transferase family protein | chr5:632877-634858 FORWARD LENGTH=235	AT5G02790.1	TAIR10_pep_20101214_contaminants.fasta	27091.6	1	11	12	22	0.0175	0.464
201210Orbi_Dave_Gelsample (1)	Uncategorized Sample	BioSample 1	P41 (F020922)	| Symbols: | Ribosomal protein L4/L1 family | chr5:657830-659526 FORWARD LENGTH=407	AT5G02870.1,AT5G02870.2	TAIR10_pep_20101214_contaminants.fasta	44722.4	1	2	2	2	0.0014	0.0688
201211Orbi_Dave_Gelsample2	Uncategorized Sample	BioSample 1	S50 (F021047)	| Symbols: | Ribosomal protein L4/L1 family | chr5:657830-659526 FORWARD LENGTH=407	AT5G02870.1,AT5G02870.2	TAIR10_pep_20101214_contaminants.fasta	44722.4	1	4	5	6	0.00381	0.13
201211Orbi_Dave_Gelsample2	Uncategorized Sample	BioSample 1	S55 (F021052)	| Symbols: | Ribosomal protein L4/L1 family | chr5:657830-659526 FORWARD LENGTH=407	AT5G02870.1,AT5G02870.2	TAIR10_pep_20101214_contaminants.fasta	44722.4	1	2	2	4	0.00269	0.0639
201210Orbi_Dave_Gelsample (1)	Uncategorized Sample	BioSample 1	P39 (F020920)	| Symbols: ATMDAR2 | Pyridine nucleotide-disulphide oxidoreductase family protein | chr5:922378-924616 REVERSE LENGTH=435	AT5G03630.1	TAIR10_pep_20101214_contaminants.fasta	47481.2	1	10	11	17	0.0111	0.356
201210Orbi_Dave_Gelsample (1)	Uncategorized Sample	BioSample 1	P41 (F020922)	| Symbols: ATMDAR2 | Pyridine nucleotide-disulphide oxidoreductase family protein | chr5:922378-924616 REVERSE LENGTH=435	AT5G03630.1	TAIR10_pep_20101214_contaminants.fasta	47481.2	1	5	6	7	0.005	0.177
201210Orbi_Dave_Gelsample (1)	Uncategorized Sample	BioSample 1	P43 (F020924)	| Symbols: ATMDAR2 | Pyridine nucleotide-disulphide oxidoreductase family protein | chr5:922378-924616 REVERSE LENGTH=435	AT5G03630.1	TAIR10_pep_20101214_contaminants.fasta	47481.2	1	4	4	6	0.0031	0.124
201210Orbi_Dave_Gelsample (1)	Uncategorized Sample	BioSample 1	P44 (F020925)	| Symbols: ATMDAR2 | Pyridine nucleotide-disulphide oxidoreductase family protein | chr5:922378-924616 REVERSE LENGTH=435	AT5G03630.1	TAIR10_pep_20101214_contaminants.fasta	47481.2	1	26	39	89	0.0503	0.747
201211Orbi_Dave_Gelsample2	Uncategorized Sample	BioSample 1	S50 (F021047)	| Symbols: ATMDAR2 | Pyridine nucleotide-disulphide oxidoreductase family protein | chr5:922378-924616 REVERSE LENGTH=435	AT5G03630.1	TAIR10_pep_20101214_contaminants.fasta	47481.2	1	3	3	6	0.00381	0.0851
201210Orbi_Dave_Gelsample (1)	Uncategorized Sample	BioSample 1	P47 (F020928)	| Symbols: HEMC | hydroxymethylbilane synthase | chr5:2663763-2665596 REVERSE LENGTH=382	AT5G08280.1	TAIR10_pep_20101214_contaminants.fasta	41044.6	1	23	34	78	0.052	0.599
201210Orbi_Dave_Gelsample (1)	Uncategorized Sample	BioSample 1	P48 (F020929)	| Symbols: HEMC | hydroxymethylbilane synthase | chr5:2663763-2665596 REVERSE LENGTH=382	AT5G08280.1	TAIR10_pep_20101214_contaminants.fasta	41044.6	1	10	10	14	0.0105	0.298
201210Orbi_Dave_Gelsample (1)	Uncategorized Sample	BioSample 1	P49 (F020930)	| Symbols: HEMC | hydroxymethylbilane synthase | chr5:2663763-2665596 REVERSE LENGTH=382	AT5G08280.1	TAIR10_pep_20101214_contaminants.fasta	41044.6	0.998	2	2	3	0.0018	0.0654
201210Orbi_Dave_Gelsample (1)	Uncategorized Sample	BioSample 1	P50 (F020931)	| Symbols: HEMC | hydroxymethylbilane synthase | chr5:2663763-2665596 REVERSE LENGTH=382	AT5G08280.1	TAIR10_pep_20101214_contaminants.fasta	41044.6	1	3	3	3	0.0019	0.089
201210Orbi_Dave_Gelsample (1)	Uncategorized Sample	BioSample 1	P53 (F020934)	| Symbols: HEMC | hydroxymethylbilane synthase | chr5:2663763-2665596 REVERSE LENGTH=382	AT5G08280.1	TAIR10_pep_20101214_contaminants.fasta	41044.6	1	10	10	12	0.0078	0.283
201210Orbi_Dave_Gelsample (1)	Uncategorized Sample	BioSample 1	P54 (F020935)	| Symbols: HEMC | hydroxymethylbilane synthase | chr5:2663763-2665596 REVERSE LENGTH=382	AT5G08280.1	TAIR10_pep_20101214_contaminants.fasta	41044.6	1	3	3	4	0.0031	0.11
201211Orbi_Dave_Gelsample2	Uncategorized Sample	BioSample 1	S13 (F020989)	| Symbols: HEMC | hydroxymethylbilane synthase | chr5:2663763-2665596 REVERSE LENGTH=382	AT5G08280.1	TAIR10_pep_20101214_contaminants.fasta	41044.6	1	11	11	27	0.0183	0.288
201211Orbi_Dave_Gelsample2	Uncategorized Sample	BioSample 1	S14 (F020990)	| Symbols: HEMC | hydroxymethylbilane synthase | chr5:2663763-2665596 REVERSE LENGTH=382	AT5G08280.1	TAIR10_pep_20101214_contaminants.fasta	41044.6	1	3	3	5	0.00377	0.0785
201211Orbi_Dave_Gelsample2	Uncategorized Sample	BioSample 1	S16 (F020992)	| Symbols: HEMC | hydroxymethylbilane synthase | chr5:2663763-2665596 REVERSE LENGTH=382	AT5G08280.1	TAIR10_pep_20101214_contaminants.fasta	41044.6	1	10	10	13	0.00933	0.254
201211Orbi_Dave_Gelsample2	Uncategorized Sample	BioSample 1	S17 (F020993)	| Symbols: HEMC | hydroxymethylbilane synthase | chr5:2663763-2665596 REVERSE LENGTH=382	AT5G08280.1	TAIR10_pep_20101214_contaminants.fasta	41044.6	1	13	13	22	0.0155	0.387
201210Orbi_Dave_Gelsample (1)	Uncategorized Sample	BioSample 1	P34 (F020916)	| Symbols: | Pyruvate kinase family protein | chr5:2778433-2780300 FORWARD LENGTH=510	AT5G08570.1	TAIR10_pep_20101214_contaminants.fasta	54978.4	1	7	9	3	0.0022	0.0422
201210Orbi_Dave_Gelsample (1)	Uncategorized Sample	BioSample 1	P37 (F020918)	| Symbols: | Pyruvate kinase family protein | chr5:2778433-2780300 FORWARD LENGTH=510	AT5G08570.1	TAIR10_pep_20101214_contaminants.fasta	54978.4	0.998	2	2	6	0.00383	0.127
201211Orbi_Dave_Gelsample2	Uncategorized Sample	BioSample 1	S08 (F020984)	| Symbols: | Pyruvate kinase family protein | chr5:2778433-2780300 FORWARD LENGTH=510	AT5G08570.1	TAIR10_pep_20101214_contaminants.fasta	54978.4	1	15	15	3	0.0022	0.0431
201211Orbi_Dave_Gelsample2	Uncategorized Sample	BioSample 1	S09 (F020985)	| Symbols: | Pyruvate kinase family protein | chr5:2778433-2780300 FORWARD LENGTH=510	AT5G08570.1	TAIR10_pep_20101214_contaminants.fasta	54978.4	1	13	15	29	0.0191	0.286
201211Orbi_Dave_Gelsample2	Uncategorized Sample	BioSample 1	S57 (F021054)	| Symbols: | Pyruvate kinase family protein | chr5:2778433-2780300 FORWARD LENGTH=510	AT5G08570.1	TAIR10_pep_20101214_contaminants.fasta	54978.4	1	5	5	8	0.00511	0.0804
201210Orbi_Dave_Gelsample (1)	Uncategorized Sample	BioSample 1	P36 (F020967)	| Symbols: | ATP synthase alpha/beta family protein | chr5:2818395-2821149 REVERSE LENGTH=556	AT5G08670.1,AT5G08680.1,AT5G08690.1	TAIR10_pep_20101214_contaminants.fasta	59632.2	1	3	3	4	0.0064	0.0953
201211Orbi_Dave_Gelsample2	Uncategorized Sample	BioSample 1	S04 (F020980)	| Symbols: | ATP synthase alpha/beta family protein | chr5:2818395-2821149 REVERSE LENGTH=556	AT5G08670.1,AT5G08680.1,AT5G08690.1	TAIR10_pep_20101214_contaminants.fasta	59632.2	1	3	3	4	0.00258	0.0917
201210Orbi_Dave_Gelsample (1)	Uncategorized Sample	BioSample 1	P49 (F020930)	| Symbols: PMDH2 | peroxisomal NAD-malate dehydrogenase 2 | chr5:2993645-2995551 REVERSE LENGTH=354	AT5G09660.1,AT5G09660.2	TAIR10_pep_20101214_contaminants.fasta	37369.4	1	3	3	5	0.003	0.124
201210Orbi_Dave_Gelsample (1)	Uncategorized Sample	BioSample 1	P59 (F020940)	| Symbols: PMDH2 | peroxisomal NAD-malate dehydrogenase 2 | chr5:2993645-2995551 REVERSE LENGTH=354	AT5G09660.1,AT5G09660.2	TAIR10_pep_20101214_contaminants.fasta	37369.4	1	6	6	9	0.008	0.167
201210Orbi_Dave_Gelsample (1)	Uncategorized Sample	BioSample 1	P63 (F020944)	| Symbols: PMDH2 | peroxisomal NAD-malate dehydrogenase 2 | chr5:2993645-2995551 REVERSE LENGTH=354	AT5G09660.1,AT5G09660.2	TAIR10_pep_20101214_contaminants.fasta	37369.4	1	3	3	4	0.0034	0.096
201211Orbi_Dave_Gelsample2	Uncategorized Sample	BioSample 1	S16 (F020992)	| Symbols: PMDH2 | peroxisomal NAD-malate dehydrogenase 2 | chr5:2993645-2995551 REVERSE LENGTH=354	AT5G09660.1,AT5G09660.2	TAIR10_pep_20101214_contaminants.fasta	37369.4	1	9	12	20	0.0144	0.268
201211Orbi_Dave_Gelsample2	Uncategorized Sample	BioSample 1	S17 (F020993)	| Symbols: PMDH2 | peroxisomal NAD-malate dehydrogenase 2 | chr5:2993645-2995551 REVERSE LENGTH=354	AT5G09660.1,AT5G09660.2	TAIR10_pep_20101214_contaminants.fasta	37369.4	1	6	7	13	0.00915	0.234
201211Orbi_Dave_Gelsample2	Uncategorized Sample	BioSample 1	S21 (F020997)	| Symbols: PMDH2 | peroxisomal NAD-malate dehydrogenase 2 | chr5:2993645-2995551 REVERSE LENGTH=354	AT5G09660.1,AT5G09660.2	TAIR10_pep_20101214_contaminants.fasta	37369.4	1	3	3	4	0.00305	0.096
201211Orbi_Dave_Gelsample2	Uncategorized Sample	BioSample 1	S32 (F021014)	| Symbols: PMDH2 | peroxisomal NAD-malate dehydrogenase 2 | chr5:2993645-2995551 REVERSE LENGTH=354	AT5G09660.1,AT5G09660.2	TAIR10_pep_20101214_contaminants.fasta	37369.4	1	8	10	17	0.0112	0.251
201210Orbi_Dave_Gelsample (1)	Uncategorized Sample	BioSample 1	P41 (F020922)	| Symbols: ACT7 | actin 7 | chr5:3052809-3054220 FORWARD LENGTH=377	AT5G09810.1	TAIR10_pep_20101214_contaminants.fasta	41736.6	1	4	4	6	0.0043	0.321
201210Orbi_Dave_Gelsample (1)	Uncategorized Sample	BioSample 1	P43 (F020924)	| Symbols: ACT7 | actin 7 | chr5:3052809-3054220 FORWARD LENGTH=377	AT5G09810.1	TAIR10_pep_20101214_contaminants.fasta	41736.6	0.998	2	2	3	0.0016	0.223
201210Orbi_Dave_Gelsample (1)	Uncategorized Sample	BioSample 1	P44 (F020925)	| Symbols: ACT7 | actin 7 | chr5:3052809-3054220 FORWARD LENGTH=377	AT5G09810.1	TAIR10_pep_20101214_contaminants.fasta	41736.6	1	7	11	19	0.0107	0.424
201211Orbi_Dave_Gelsample2	Uncategorized Sample	BioSample 1	S03 (F020979)	| Symbols: ACT7 | actin 7 | chr5:3052809-3054220 FORWARD LENGTH=377	AT5G09810.1	TAIR10_pep_20101214_contaminants.fasta	41736.6	1	5	5	7	0.00499	0.135
201211Orbi_Dave_Gelsample2	Uncategorized Sample	BioSample 1	S18 (F020994)	| Symbols: ACT7 | actin 7 | chr5:3052809-3054220 FORWARD LENGTH=377	AT5G09810.1	TAIR10_pep_20101214_contaminants.fasta	41736.6	1	2	2	3	0.00281	0.0584
201211Orbi_Dave_Gelsample2	Uncategorized Sample	BioSample 1	S22 (F020998)	| Symbols: ACT7 | actin 7 | chr5:3052809-3054220 FORWARD LENGTH=377	AT5G09810.1	TAIR10_pep_20101214_contaminants.fasta	41736.6	1	3	3	4	0.00309	0.101
201211Orbi_Dave_Gelsample2	Uncategorized Sample	BioSample 1	S50 (F021047)	| Symbols: ACT7 | actin 7 | chr5:3052809-3054220 FORWARD LENGTH=377	AT5G09810.1	TAIR10_pep_20101214_contaminants.fasta	41736.6	1	14	15	29	0.0184	0.385
201210Orbi_Dave_Gelsample (1)	Uncategorized Sample	BioSample 1	P05 (F020904)	| Symbols: | Zincin-like metalloproteases family protein | chr5:3328119-3332462 FORWARD LENGTH=701	AT5G10540.1	TAIR10_pep_20101214_contaminants.fasta	79046.3	1	9	11	8	0.0053	0.231
201210Orbi_Dave_Gelsample (1)	Uncategorized Sample	BioSample 1	P06 (F020905)	| Symbols: | Zincin-like metalloproteases family protein | chr5:3328119-3332462 FORWARD LENGTH=701	AT5G10540.1	TAIR10_pep_20101214_contaminants.fasta	79046.3	1	11	11	14	0.0094	0.369
201210Orbi_Dave_Gelsample (1)	Uncategorized Sample	BioSample 1	P27 (F020910)	| Symbols: | Zincin-like metalloproteases family protein | chr5:3328119-3332462 FORWARD LENGTH=701	AT5G10540.1	TAIR10_pep_20101214_contaminants.fasta	79046.3	1	16	21	16	0.0106	0.18
201210Orbi_Dave_Gelsample (1)	Uncategorized Sample	BioSample 1	P28 (F020911)	| Symbols: | Zincin-like metalloproteases family protein | chr5:3328119-3332462 FORWARD LENGTH=701	AT5G10540.1	TAIR10_pep_20101214_contaminants.fasta	79046.3	1	39	52	108	0.0727	0.608
201211Orbi_Dave_Gelsample2	Uncategorized Sample	BioSample 1	S04 (F020980)	| Symbols: | Zincin-like metalloproteases family protein | chr5:3328119-3332462 FORWARD LENGTH=701	AT5G10540.1	TAIR10_pep_20101214_contaminants.fasta	79046.3	1	2	2	3	0.00194	0.03
201210Orbi_Dave_Gelsample (1)	Uncategorized Sample	BioSample 1	P33 (F020915)	| Symbols: PYD2 | pyrimidine 2 | chr5:3941700-3944727 REVERSE LENGTH=531	AT5G12200.1	TAIR10_pep_20101214_contaminants.fasta	57992.1	1	11	11	18	0.0127	0.23
201211Orbi_Dave_Gelsample2	Uncategorized Sample	BioSample 1	S08 (F020984)	| Symbols: PYD2 | pyrimidine 2 | chr5:3941700-3944727 REVERSE LENGTH=531	AT5G12200.1	TAIR10_pep_20101214_contaminants.fasta	57992.1	1	7	7	11	0.00726	0.136
201210Orbi_Dave_Gelsample (1)	Uncategorized Sample	BioSample 1	P22 (F020887)	| Symbols: SEC10 | exocyst complex component sec10 | chr5:4003002-4008445 REVERSE LENGTH=825	AT5G12370.1,AT5G12370.2	TAIR10_pep_20101214_contaminants.fasta	89696.9	1	7	7	10	0.00712	0.0691
201211Orbi_Dave_Gelsample2	Uncategorized Sample	BioSample 1	S03 (F020979)	| Symbols: SEC10 | exocyst complex component sec10 | chr5:4003002-4008445 REVERSE LENGTH=825	AT5G12370.1,AT5G12370.2	TAIR10_pep_20101214_contaminants.fasta	89696.9	1	6	6	31	0.0243	0.228
201210Orbi_Dave_Gelsample (1)	Uncategorized Sample	BioSample 1	P47 (F020928)	| Symbols: | Protein of unknown function (DUF3411) | chr5:4044950-4047290 REVERSE LENGTH=386	AT5G12470.1	TAIR10_pep_20101214_contaminants.fasta	41324.5	1	6	6	9	0.006	0.161
201210Orbi_Dave_Gelsample (1)	Uncategorized Sample	BioSample 1	P48 (F020929)	| Symbols: | Protein of unknown function (DUF3411) | chr5:4044950-4047290 REVERSE LENGTH=386	AT5G12470.1	TAIR10_pep_20101214_contaminants.fasta	41324.5	1	5	5	6	0.0045	0.132
201211Orbi_Dave_Gelsample2	Uncategorized Sample	BioSample 1	S17 (F020993)	| Symbols: | Protein of unknown function (DUF3411) | chr5:4044950-4047290 REVERSE LENGTH=386	AT5G12470.1	TAIR10_pep_20101214_contaminants.fasta	41324.5	1	6	6	7	0.00493	0.161
201210Orbi_Dave_Gelsample (1)	Uncategorized Sample	BioSample 1	P41 (F020922)	| Symbols: | Aldolase-type TIM barrel family protein | chr5:4302080-4304212 REVERSE LENGTH=438	AT5G13420.1	TAIR10_pep_20101214_contaminants.fasta	47700.3	1	7	8	14	0.0101	0.215
201210Orbi_Dave_Gelsample (1)	Uncategorized Sample	BioSample 1	P42 (F020923)	| Symbols: | Aldolase-type TIM barrel family protein | chr5:4302080-4304212 REVERSE LENGTH=438	AT5G13420.1	TAIR10_pep_20101214_contaminants.fasta	47700.3	1	5	5	8	0.0062	0.178
201211Orbi_Dave_Gelsample2	Uncategorized Sample	BioSample 1	S50 (F021047)	| Symbols: | Aldolase-type TIM barrel family protein | chr5:4302080-4304212 REVERSE LENGTH=438	AT5G13420.1	TAIR10_pep_20101214_contaminants.fasta	47700.3	1	13	14	25	0.0159	0.354
201210Orbi_Dave_Gelsample (1)	Uncategorized Sample	BioSample 1	P38 (F020919)	| Symbols: | Isocitrate/isopropylmalate dehydrogenase family protein | chr5:4703533-4706627 REVERSE LENGTH=485	AT5G14590.1	TAIR10_pep_20101214_contaminants.fasta	54197.8	0.998	2	2	3	0.0021	0.0619
201211Orbi_Dave_Gelsample2	Uncategorized Sample	BioSample 1	S55 (F021052)	| Symbols: | Isocitrate/isopropylmalate dehydrogenase family protein | chr5:4703533-4706627 REVERSE LENGTH=485	AT5G14590.1	TAIR10_pep_20101214_contaminants.fasta	54197.8	1	10	11	26	0.0175	0.322
201210Orbi_Dave_Gelsample (1)	Uncategorized Sample	BioSample 1	P11 (F020876)	| Symbols: CA2, CA18, BETA CA2 | carbonic anhydrase 2 | chr5:4760536-4762382 FORWARD LENGTH=259	AT5G14740.2	TAIR10_pep_20101214_contaminants.fasta	28344.7	1	3	5	7	0.0045	0.398
201210Orbi_Dave_Gelsample (1)	Uncategorized Sample	BioSample 1	P51 (F020932)	| Symbols: CA2, CA18, BETA CA2 | carbonic anhydrase 2 | chr5:4760536-4762382 FORWARD LENGTH=259	AT5G14740.2	TAIR10_pep_20101214_contaminants.fasta	28344.7	0.998	2	3	5	0.0039	0.232
201210Orbi_Dave_Gelsample (1)	Uncategorized Sample	BioSample 1	P52 (F020933)	| Symbols: CA2, CA18, BETA CA2 | carbonic anhydrase 2 | chr5:4760536-4762382 FORWARD LENGTH=259	AT5G14740.2	TAIR10_pep_20101214_contaminants.fasta	28344.7	1	5	6	9	0.0067	0.371
201210Orbi_Dave_Gelsample (1)	Uncategorized Sample	BioSample 1	P57 (F020938)	| Symbols: CA2, CA18, BETA CA2 | carbonic anhydrase 2 | chr5:4760536-4762382 FORWARD LENGTH=259	AT5G14740.2	TAIR10_pep_20101214_contaminants.fasta	28344.7	1	3	3	5	0.0032	0.282
201210Orbi_Dave_Gelsample (1)	Uncategorized Sample	BioSample 1	P59 (F020940)	| Symbols: CA2, CA18, BETA CA2 | carbonic anhydrase 2 | chr5:4760536-4762382 FORWARD LENGTH=259	AT5G14740.2	TAIR10_pep_20101214_contaminants.fasta	28344.7	1	3	4	5	0.0045	0.483
201211Orbi_Dave_Gelsample2	Uncategorized Sample	BioSample 1	S03 (F020979)	| Symbols: CA2, CA18, BETA CA2 | carbonic anhydrase 2 | chr5:4760536-4762382 FORWARD LENGTH=259	AT5G14740.2	TAIR10_pep_20101214_contaminants.fasta	28344.7	1	9	11	25	0.0178	0.363
201211Orbi_Dave_Gelsample2	Uncategorized Sample	BioSample 1	S11 (F020987)	| Symbols: CA2, CA18, BETA CA2 | carbonic anhydrase 2 | chr5:4760536-4762382 FORWARD LENGTH=259	AT5G14740.2	TAIR10_pep_20101214_contaminants.fasta	28344.7	1	16	18	32	0.0225	0.556
201211Orbi_Dave_Gelsample2	Uncategorized Sample	BioSample 1	S14 (F020990)	| Symbols: CA2, CA18, BETA CA2 | carbonic anhydrase 2 | chr5:4760536-4762382 FORWARD LENGTH=259	AT5G14740.2	TAIR10_pep_20101214_contaminants.fasta	28344.7	1	8	9	15	0.0113	0.34
201211Orbi_Dave_Gelsample2	Uncategorized Sample	BioSample 1	S22 (F020998)	| Symbols: CA2, CA18, BETA CA2 | carbonic anhydrase 2 | chr5:4760536-4762382 FORWARD LENGTH=259	AT5G14740.2	TAIR10_pep_20101214_contaminants.fasta	28344.7	1	9	10	16	0.0124	0.405
201211Orbi_Dave_Gelsample2	Uncategorized Sample	BioSample 1	S23 (F020999)	| Symbols: CA2, CA18, BETA CA2 | carbonic anhydrase 2 | chr5:4760536-4762382 FORWARD LENGTH=259	AT5G14740.2	TAIR10_pep_20101214_contaminants.fasta	28344.7	1	8	9	12	0.00898	0.336
201211Orbi_Dave_Gelsample2	Uncategorized Sample	BioSample 1	S24 (F021000)	| Symbols: CA2, CA18, BETA CA2 | carbonic anhydrase 2 | chr5:4760536-4762382 FORWARD LENGTH=259	AT5G14740.2	TAIR10_pep_20101214_contaminants.fasta	28344.7	1	30	46	126	0.0874	0.846
201211Orbi_Dave_Gelsample2	Uncategorized Sample	BioSample 1	S25 (F021001)	| Symbols: CA2, CA18, BETA CA2 | carbonic anhydrase 2 | chr5:4760536-4762382 FORWARD LENGTH=259	AT5G14740.2	TAIR10_pep_20101214_contaminants.fasta	28344.7	1	18	20	33	0.0218	0.687
201211Orbi_Dave_Gelsample2	Uncategorized Sample	BioSample 1	S27 (F021003)	| Symbols: CA2, CA18, BETA CA2 | carbonic anhydrase 2 | chr5:4760536-4762382 FORWARD LENGTH=259	AT5G14740.2	TAIR10_pep_20101214_contaminants.fasta	28344.7	1	8	11	29	0.0231	0.344
201211Orbi_Dave_Gelsample2	Uncategorized Sample	BioSample 1	S28 (F021004)	| Symbols: CA2, CA18, BETA CA2 | carbonic anhydrase 2 | chr5:4760536-4762382 FORWARD LENGTH=259	AT5G14740.2	TAIR10_pep_20101214_contaminants.fasta	28344.7	1	8	10	44	0.0331	0.313
201211Orbi_Dave_Gelsample2	Uncategorized Sample	BioSample 1	S30 (F021012)	| Symbols: CA2, CA18, BETA CA2 | carbonic anhydrase 2 | chr5:4760536-4762382 FORWARD LENGTH=259	AT5G14740.2	TAIR10_pep_20101214_contaminants.fasta	28344.7	1	7	9	14	0.00989	0.286
201211Orbi_Dave_Gelsample2	Uncategorized Sample	BioSample 1	S35 (F021017)	| Symbols: CA2, CA18, BETA CA2 | carbonic anhydrase 2 | chr5:4760536-4762382 FORWARD LENGTH=259	AT5G14740.2	TAIR10_pep_20101214_contaminants.fasta	28344.7	1	2	2	2	0.00156	0.1
201210Orbi_Dave_Gelsample (1)	Uncategorized Sample	BioSample 1	P43 (F020924)	| Symbols: FDH | formate dehydrogenase | chr5:4777043-4779190 FORWARD LENGTH=384	AT5G14780.1	TAIR10_pep_20101214_contaminants.fasta	42410.5	0.998	2	2	2	0.0011	0.0573
201210Orbi_Dave_Gelsample (1)	Uncategorized Sample	BioSample 1	P47 (F020928)	| Symbols: FDH | formate dehydrogenase | chr5:4777043-4779190 FORWARD LENGTH=384	AT5G14780.1	TAIR10_pep_20101214_contaminants.fasta	42410.5	0.998	2	2	3	0.002	0.0573
201211Orbi_Dave_Gelsample2	Uncategorized Sample	BioSample 1	S52 (F021049)	| Symbols: FDH | formate dehydrogenase | chr5:4777043-4779190 FORWARD LENGTH=384	AT5G14780.1	TAIR10_pep_20101214_contaminants.fasta	42410.5	1	17	18	34	0.0211	0.37
201211Orbi_Dave_Gelsample2	Uncategorized Sample	BioSample 1	S55 (F021052)	| Symbols: FDH | formate dehydrogenase | chr5:4777043-4779190 FORWARD LENGTH=384	AT5G14780.1	TAIR10_pep_20101214_contaminants.fasta	42410.5	1	8	8	11	0.0074	0.177
201210Orbi_Dave_Gelsample (1)	Uncategorized Sample	BioSample 1	P33 (F020915)	| Symbols: | TCP-1/cpn60 chaperonin family protein | chr5:5247549-5251050 REVERSE LENGTH=535	AT5G16070.1	TAIR10_pep_20101214_contaminants.fasta	58928.5	0.998	2	2	74	0.0539	0.587
201211Orbi_Dave_Gelsample2	Uncategorized Sample	BioSample 1	S08 (F020984)	| Symbols: | TCP-1/cpn60 chaperonin family protein | chr5:5247549-5251050 REVERSE LENGTH=535	AT5G16070.1	TAIR10_pep_20101214_contaminants.fasta	58928.5	1	10	10	14	0.00923	0.226
201210Orbi_Dave_Gelsample (1)	Uncategorized Sample	BioSample 1	P15 (F020879)	| Symbols: DHAR3 | dehydroascorbate reductase 1 | chr5:5483312-5484926 FORWARD LENGTH=258	AT5G16710.1	TAIR10_pep_20101214_contaminants.fasta	28514.5	1	8	9	17	0.0125	0.345
201211Orbi_Dave_Gelsample2	Uncategorized Sample	BioSample 1	S27 (F021003)	| Symbols: DHAR3 | dehydroascorbate reductase 1 | chr5:5483312-5484926 FORWARD LENGTH=258	AT5G16710.1	TAIR10_pep_20101214_contaminants.fasta	28514.5	1	6	6	13	0.0103	0.275
201210Orbi_Dave_Gelsample (1)	Uncategorized Sample	BioSample 1	P47 (F020928)	| Symbols: AT-AER, AER | alkenal reductase | chr5:5576291-5578001 REVERSE LENGTH=345	AT5G16970.1	TAIR10_pep_20101214_contaminants.fasta	38133.9	1	15	18	24	0.016	0.614
201210Orbi_Dave_Gelsample (1)	Uncategorized Sample	BioSample 1	P48 (F020929)	| Symbols: AT-AER, AER | alkenal reductase | chr5:5576291-5578001 REVERSE LENGTH=345	AT5G16970.1	TAIR10_pep_20101214_contaminants.fasta	38133.9	1	6	7	10	0.0075	0.206
201210Orbi_Dave_Gelsample (1)	Uncategorized Sample	BioSample 1	P50 (F020931)	| Symbols: AT-AER, AER | alkenal reductase | chr5:5576291-5578001 REVERSE LENGTH=345	AT5G16970.1	TAIR10_pep_20101214_contaminants.fasta	38133.9	0.998	2	2	2	0.0013	0.0609
201211Orbi_Dave_Gelsample2	Uncategorized Sample	BioSample 1	S14 (F020990)	| Symbols: AT-AER, AER | alkenal reductase | chr5:5576291-5578001 REVERSE LENGTH=345	AT5G16970.1	TAIR10_pep_20101214_contaminants.fasta	38133.9	1	12	13	24	0.0181	0.504
201210Orbi_Dave_Gelsample (1)	Uncategorized Sample	BioSample 1	P01 (F020874)	| Symbols: ATCIMS, ATMETS, ATMS1 | Cobalamin-independent synthase family protein | chr5:5935771-5939195 FORWARD LENGTH=765	AT5G17920.1,AT5G17920.2	TAIR10_pep_20101214_contaminants.fasta	84358.4	1	5	5	7	0.0044	0.0784
201210Orbi_Dave_Gelsample (1)	Uncategorized Sample	BioSample 1	P17 (F020881)	| Symbols: ATCIMS, ATMETS, ATMS1 | Cobalamin-independent synthase family protein | chr5:5935771-5939195 FORWARD LENGTH=765	AT5G17920.1,AT5G17920.2	TAIR10_pep_20101214_contaminants.fasta	84358.4	0.998	2	2	3	0.0044	0.0458
201210Orbi_Dave_Gelsample (1)	Uncategorized Sample	BioSample 1	P20 (F020885)	| Symbols: ATCIMS, ATMETS, ATMS1 | Cobalamin-independent synthase family protein | chr5:5935771-5939195 FORWARD LENGTH=765	AT5G17920.1,AT5G17920.2	TAIR10_pep_20101214_contaminants.fasta	84358.4	0.998	2	2	2	0.0016	0.0275
201210Orbi_Dave_Gelsample (1)	Uncategorized Sample	BioSample 1	P24 (F020889)	| Symbols: ATCIMS, ATMETS, ATMS1 | Cobalamin-independent synthase family protein | chr5:5935771-5939195 FORWARD LENGTH=765	AT5G17920.1,AT5G17920.2	TAIR10_pep_20101214_contaminants.fasta	84358.4	1	10	11	23	0.0283	0.178
201210Orbi_Dave_Gelsample (1)	Uncategorized Sample	BioSample 1	P25 (F020908)	| Symbols: ATCIMS, ATMETS, ATMS1 | Cobalamin-independent synthase family protein | chr5:5935771-5939195 FORWARD LENGTH=765	AT5G17920.1,AT5G17920.2	TAIR10_pep_20101214_contaminants.fasta	84358.4	1	4	4	5	0.0055	0.0667
201210Orbi_Dave_Gelsample (1)	Uncategorized Sample	BioSample 1	P26 (F020909)	| Symbols: ATCIMS, ATMETS, ATMS1 | Cobalamin-independent synthase family protein | chr5:5935771-5939195 FORWARD LENGTH=765	AT5G17920.1,AT5G17920.2	TAIR10_pep_20101214_contaminants.fasta	84358.4	1	23	28	42	0.046	0.412
201210Orbi_Dave_Gelsample (1)	Uncategorized Sample	BioSample 1	P32 (F020914)	| Symbols: ATCIMS, ATMETS, ATMS1 | Cobalamin-independent synthase family protein | chr5:5935771-5939195 FORWARD LENGTH=765	AT5G17920.1,AT5G17920.2	TAIR10_pep_20101214_contaminants.fasta	84358.4	0.998	2	2	2	0.0015	0.0327
201210Orbi_Dave_Gelsample (1)	Uncategorized Sample	BioSample 1	P34 (F020916)	| Symbols: ATCIMS, ATMETS, ATMS1 | Cobalamin-independent synthase family protein | chr5:5935771-5939195 FORWARD LENGTH=765	AT5G17920.1,AT5G17920.2	TAIR10_pep_20101214_contaminants.fasta	84358.4	0.998	2	2	2	0.0017	0.0392
201210Orbi_Dave_Gelsample (1)	Uncategorized Sample	BioSample 1	P48 (F020929)	| Symbols: ATCIMS, ATMETS, ATMS1 | Cobalamin-independent synthase family protein | chr5:5935771-5939195 FORWARD LENGTH=765	AT5G17920.1,AT5G17920.2	TAIR10_pep_20101214_contaminants.fasta	84358.4	1	4	4	6	0.0045	0.068
201210Orbi_Dave_Gelsample (1)	Uncategorized Sample	BioSample 1	P49 (F020930)	| Symbols: ATCIMS, ATMETS, ATMS1 | Cobalamin-independent synthase family protein | chr5:5935771-5939195 FORWARD LENGTH=765	AT5G17920.1,AT5G17920.2	TAIR10_pep_20101214_contaminants.fasta	84358.4	1	3	3	3	0.0018	0.0523
201211Orbi_Dave_Gelsample2	Uncategorized Sample	BioSample 1	S03 (F020979)	| Symbols: ATCIMS, ATMETS, ATMS1 | Cobalamin-independent synthase family protein | chr5:5935771-5939195 FORWARD LENGTH=765	AT5G17920.1,AT5G17920.2	TAIR10_pep_20101214_contaminants.fasta	84358.4	1	2	2	3	0.00214	0.0314
201211Orbi_Dave_Gelsample2	Uncategorized Sample	BioSample 1	S04 (F020980)	| Symbols: ATCIMS, ATMETS, ATMS1 | Cobalamin-independent synthase family protein | chr5:5935771-5939195 FORWARD LENGTH=765	AT5G17920.1,AT5G17920.2	TAIR10_pep_20101214_contaminants.fasta	84358.4	1	12	12	17	0.011	0.179
201211Orbi_Dave_Gelsample2	Uncategorized Sample	BioSample 1	S06 (F020982)	| Symbols: ATCIMS, ATMETS, ATMS1 | Cobalamin-independent synthase family protein | chr5:5935771-5939195 FORWARD LENGTH=765	AT5G17920.1,AT5G17920.2	TAIR10_pep_20101214_contaminants.fasta	84358.4	1	3	3	4	0.00373	0.0405
201211Orbi_Dave_Gelsample2	Uncategorized Sample	BioSample 1	S14 (F020990)	| Symbols: ATCIMS, ATMETS, ATMS1 | Cobalamin-independent synthase family protein | chr5:5935771-5939195 FORWARD LENGTH=765	AT5G17920.1,AT5G17920.2	TAIR10_pep_20101214_contaminants.fasta	84358.4	1	2	2	2	0.00151	0.0209
201210Orbi_Dave_Gelsample (1)	Uncategorized Sample	BioSample 1	P49 (F020930)	| Symbols: | NAD(P)-binding Rossmann-fold superfamily protein | chr5:6556493-6558123 FORWARD LENGTH=326	AT5G19440.1	TAIR10_pep_20101214_contaminants.fasta	35593.9	1	3	3	35	0.0557	0.304
201211Orbi_Dave_Gelsample2	Uncategorized Sample	BioSample 1	S16 (F020992)	| Symbols: | NAD(P)-binding Rossmann-fold superfamily protein | chr5:6556493-6558123 FORWARD LENGTH=326	AT5G19440.1	TAIR10_pep_20101214_contaminants.fasta	35593.9	1	8	9	3	0.0018	0.104
201211Orbi_Dave_Gelsample2	Uncategorized Sample	BioSample 1	S17 (F020993)	| Symbols: | NAD(P)-binding Rossmann-fold superfamily protein | chr5:6556493-6558123 FORWARD LENGTH=326	AT5G19440.1	TAIR10_pep_20101214_contaminants.fasta	35593.9	1	7	7	4	0.0024	0.0938
201210Orbi_Dave_Gelsample (1)	Uncategorized Sample	BioSample 1	P56 (F020937)	| Symbols: | Translation elongation factor EF1B/ribosomal protein S6 family protein | chr5:6581854-6583137 REVERSE LENGTH=224	AT5G19510.1	TAIR10_pep_20101214_contaminants.fasta	24201.2	1	10	16	44	0.0373	0.692
201211Orbi_Dave_Gelsample2	Uncategorized Sample	BioSample 1	S19 (F020995)	| Symbols: | Translation elongation factor EF1B/ribosomal protein S6 family protein | chr5:6581854-6583137 REVERSE LENGTH=224	AT5G19510.1	TAIR10_pep_20101214_contaminants.fasta	24201.2	1	3	3	5	0.00386	0.254
201210Orbi_Dave_Gelsample (1)	Uncategorized Sample	BioSample 1	P58 (F020939)	| Symbols: RAN-1, RAN1, ATRAN1 | RAS-related nuclear protein-1 | chr5:6760364-6761747 FORWARD LENGTH=221	AT5G20010.1,AT5G20020.1,AT5G55190.1	TAIR10_pep_20101214_contaminants.fasta	25079.7	1	4	4	5	0.0036	0.19
201211Orbi_Dave_Gelsample2	Uncategorized Sample	BioSample 1	S16 (F020992)	| Symbols: RAN-1, RAN1, ATRAN1 | RAS-related nuclear protein-1 | chr5:6760364-6761747 FORWARD LENGTH=221	AT5G20010.1,AT5G20020.1,AT5G55190.1	TAIR10_pep_20101214_contaminants.fasta	25079.7	1	5	6	11	0.0079	0.24
201211Orbi_Dave_Gelsample2	Uncategorized Sample	BioSample 1	S26 (F021002)	| Symbols: RAN-1, RAN1, ATRAN1 | RAS-related nuclear protein-1 | chr5:6760364-6761747 FORWARD LENGTH=221	AT5G20010.1,AT5G20020.1,AT5G55190.1	TAIR10_pep_20101214_contaminants.fasta	25079.7	1	5	5	10	0.00876	0.24
201210Orbi_Dave_Gelsample (1)	Uncategorized Sample	BioSample 1	P54 (F020935)	| Symbols: GLP3, GLP3A, GLP3B, ATGER3, GER3 | germin 3 | chr5:6975315-6975950 REVERSE LENGTH=211	AT5G20630.1	TAIR10_pep_20101214_contaminants.fasta	21836.9	0.998	2	3	10	0.0079	0.199
201210Orbi_Dave_Gelsample (1)	Uncategorized Sample	BioSample 1	P62 (F020943)	| Symbols: GLP3, GLP3A, GLP3B, ATGER3, GER3 | germin 3 | chr5:6975315-6975950 REVERSE LENGTH=211	AT5G20630.1	TAIR10_pep_20101214_contaminants.fasta	21836.9	1	3	5	12	0.0096	0.242
201211Orbi_Dave_Gelsample2	Uncategorized Sample	BioSample 1	S38 (F021020)	| Symbols: GLP3, GLP3A, GLP3B, ATGER3, GER3 | germin 3 | chr5:6975315-6975950 REVERSE LENGTH=211	AT5G20630.1	TAIR10_pep_20101214_contaminants.fasta	21836.9	1	4	6	4	0.00307	0.1
201210Orbi_Dave_Gelsample (1)	Uncategorized Sample	BioSample 1	P16 (F020880)	| Symbols: CPN20, CPN10, CHCPN10, ATCPN21, CPN21 | chaperonin 20 | chr5:7015015-7016354 FORWARD LENGTH=253	AT5G20720.1,AT5G20720.2,AT5G20720.3	TAIR10_pep_20101214_contaminants.fasta	26802.8	1	5	5	9	0.0086	0.3
201210Orbi_Dave_Gelsample (1)	Uncategorized Sample	BioSample 1	P63 (F020944)	| Symbols: CPN20, CPN10, CHCPN10, ATCPN21, CPN21 | chaperonin 20 | chr5:7015015-7016354 FORWARD LENGTH=253	AT5G20720.1,AT5G20720.2,AT5G20720.3	TAIR10_pep_20101214_contaminants.fasta	26802.8	1	3	3	3	0.0025	0.178
201211Orbi_Dave_Gelsample2	Uncategorized Sample	BioSample 1	S29 (F021005)	| Symbols: CPN20, CPN10, CHCPN10, ATCPN21, CPN21 | chaperonin 20 | chr5:7015015-7016354 FORWARD LENGTH=253	AT5G20720.1,AT5G20720.2,AT5G20720.3	TAIR10_pep_20101214_contaminants.fasta	26802.8	1	6	6	10	0.00941	0.36
201210Orbi_Dave_Gelsample (1)	Uncategorized Sample	BioSample 1	P38 (F020919)	| Symbols: | phosphoglycerate/bisphosphoglycerate mutase family protein | chr5:7517731-7520223 REVERSE LENGTH=482	AT5G22620.1,AT5G22620.2,AT5G22620.3	TAIR10_pep_20101214_contaminants.fasta	53115.2	1	6	6	10	0.0069	0.154
201210Orbi_Dave_Gelsample (1)	Uncategorized Sample	BioSample 1	P40 (F020921)	| Symbols: | phosphoglycerate/bisphosphoglycerate mutase family protein | chr5:7517731-7520223 REVERSE LENGTH=482	AT5G22620.1,AT5G22620.2,AT5G22620.3	TAIR10_pep_20101214_contaminants.fasta	53115.2	1	3	3	5	0.0028	0.0809
201211Orbi_Dave_Gelsample2	Uncategorized Sample	BioSample 1	S55 (F021052)	| Symbols: | phosphoglycerate/bisphosphoglycerate mutase family protein | chr5:7517731-7520223 REVERSE LENGTH=482	AT5G22620.1,AT5G22620.2,AT5G22620.3	TAIR10_pep_20101214_contaminants.fasta	53115.2	1	7	7	12	0.00808	0.18
201210Orbi_Dave_Gelsample (1)	Uncategorized Sample	BioSample 1	P29 (F020912)	| Symbols: TGG2, BGLU37 | glucoside glucohydrolase 2 | chr5:9072730-9075143 FORWARD LENGTH=467	AT5G25980.1,AT5G25980.2,AT5G25980.3	TAIR10_pep_20101214_contaminants.fasta	53425	1	3	3	6	0.0052	0.11
201211Orbi_Dave_Gelsample2	Uncategorized Sample	BioSample 1	S07 (F020983)	| Symbols: TGG2, BGLU37 | glucoside glucohydrolase 2 | chr5:9072730-9075143 FORWARD LENGTH=467	AT5G25980.1,AT5G25980.2,AT5G25980.3	TAIR10_pep_20101214_contaminants.fasta	53425	0.999	2	3	5	0.00473	0.06
201211Orbi_Dave_Gelsample2	Uncategorized Sample	BioSample 1	S56 (F021053)	| Symbols: TGG2, BGLU37 | glucoside glucohydrolase 2 | chr5:9072730-9075143 FORWARD LENGTH=467	AT5G25980.1,AT5G25980.2,AT5G25980.3	TAIR10_pep_20101214_contaminants.fasta	53425	1	3	3	6	0.00503	0.0985
201210Orbi_Dave_Gelsample (1)	Uncategorized Sample	BioSample 1	P05 (F020904)	| Symbols: TGG1, BGLU38 | thioglucoside glucohydrolase 1 | chr5:9079678-9082347 REVERSE LENGTH=541	AT5G26000.1,AT5G26000.2	TAIR10_pep_20101214_contaminants.fasta	51482.9	1	14	20	41	0.0322	0.351
201210Orbi_Dave_Gelsample (1)	Uncategorized Sample	BioSample 1	P06 (F020905)	| Symbols: TGG1, BGLU38 | thioglucoside glucohydrolase 1 | chr5:9079678-9082347 REVERSE LENGTH=541	AT5G26000.1,AT5G26000.2	TAIR10_pep_20101214_contaminants.fasta	51482.9	1	24	32	142	0.0945	0.515
201210Orbi_Dave_Gelsample (1)	Uncategorized Sample	BioSample 1	P27 (F020910)	| Symbols: TGG1, BGLU38 | thioglucoside glucohydrolase 1 | chr5:9079678-9082347 REVERSE LENGTH=541	AT5G26000.1,AT5G26000.2	TAIR10_pep_20101214_contaminants.fasta	51482.9	1	8	8	16	0.0107	0.171
201210Orbi_Dave_Gelsample (1)	Uncategorized Sample	BioSample 1	P28 (F020911)	| Symbols: TGG1, BGLU38 | thioglucoside glucohydrolase 1 | chr5:9079678-9082347 REVERSE LENGTH=541	AT5G26000.1,AT5G26000.2	TAIR10_pep_20101214_contaminants.fasta	51482.9	1	5	5	7	0.0047	0.169
201211Orbi_Dave_Gelsample2	Uncategorized Sample	BioSample 1	S02 (F020978)	| Symbols: TGG1, BGLU38 | thioglucoside glucohydrolase 1 | chr5:9079678-9082347 REVERSE LENGTH=541	AT5G26000.1,AT5G26000.2	TAIR10_pep_20101214_contaminants.fasta	51482.9	1	5	5	10	0.00646	0.121
201211Orbi_Dave_Gelsample2	Uncategorized Sample	BioSample 1	S04 (F020980)	| Symbols: TGG1, BGLU38 | thioglucoside glucohydrolase 1 | chr5:9079678-9082347 REVERSE LENGTH=541	AT5G26000.1,AT5G26000.2	TAIR10_pep_20101214_contaminants.fasta	51482.9	1	5	5	3	0.0018	0.0771
201210Orbi_Dave_Gelsample (1)	Uncategorized Sample	BioSample 1	P37 (F020918)	| Symbols: | seryl-tRNA synthetase / serine--tRNA ligase | chr5:9695087-9697154 FORWARD LENGTH=451	AT5G27470.1	TAIR10_pep_20101214_contaminants.fasta	51630.6	1	28	37	80	0.0583	0.579
201211Orbi_Dave_Gelsample2	Uncategorized Sample	BioSample 1	S05 (F020981)	| Symbols: | seryl-tRNA synthetase / serine--tRNA ligase | chr5:9695087-9697154 FORWARD LENGTH=451	AT5G27470.1	TAIR10_pep_20101214_contaminants.fasta	51630.6	1	6	6	10	0.00691	0.135
201211Orbi_Dave_Gelsample2	Uncategorized Sample	BioSample 1	S06 (F020982)	| Symbols: | seryl-tRNA synthetase / serine--tRNA ligase | chr5:9695087-9697154 FORWARD LENGTH=451	AT5G27470.1	TAIR10_pep_20101214_contaminants.fasta	51630.6	1	9	9	17	0.0159	0.215
201211Orbi_Dave_Gelsample2	Uncategorized Sample	BioSample 1	S57 (F021054)	| Symbols: | seryl-tRNA synthetase / serine--tRNA ligase | chr5:9695087-9697154 FORWARD LENGTH=451	AT5G27470.1	TAIR10_pep_20101214_contaminants.fasta	51630.6	1	12	12	21	0.0134	0.228
201210Orbi_Dave_Gelsample (1)	Uncategorized Sample	BioSample 1	P16 (F020880)	| Symbols: TIF3B1, EIF3B, ATEIF3B-1, EIF3B-1, ATTIF3B1 | translation initiation factor 3B1 | chr5:9781207-9784759 REVERSE LENGTH=712	AT5G27640.1	TAIR10_pep_20101214_contaminants.fasta	81876.6	1	4	5	7	0.0067	0.0646
201210Orbi_Dave_Gelsample (1)	Uncategorized Sample	BioSample 1	P22 (F020887)	| Symbols: TIF3B1, EIF3B, ATEIF3B-1, EIF3B-1, ATTIF3B1 | translation initiation factor 3B1 | chr5:9781207-9784759 REVERSE LENGTH=712	AT5G27640.1	TAIR10_pep_20101214_contaminants.fasta	81876.6	1	23	26	48	0.0425	0.351
201211Orbi_Dave_Gelsample2	Uncategorized Sample	BioSample 1	S03 (F020979)	| Symbols: TIF3B1, EIF3B, ATEIF3B-1, EIF3B-1, ATTIF3B1 | translation initiation factor 3B1 | chr5:9781207-9784759 REVERSE LENGTH=712	AT5G27640.1,AT5G27640.2	TAIR10_pep_20101214_contaminants.fasta	81876.6	1	10	10	17	0.0121	0.16
201210Orbi_Dave_Gelsample (1)	Uncategorized Sample	BioSample 1	P62 (F020943)	| Symbols: | Cytidine/deoxycytidylate deaminase family protein | chr5:10044209-10045755 REVERSE LENGTH=185	AT5G28050.1,AT5G28050.2	TAIR10_pep_20101214_contaminants.fasta	20001.5	0.998	2	3	4	0.0032	0.135
201211Orbi_Dave_Gelsample2	Uncategorized Sample	BioSample 1	S32 (F021014)	| Symbols: | Cytidine/deoxycytidylate deaminase family protein | chr5:10044209-10045755 REVERSE LENGTH=185	AT5G28050.1,AT5G28050.2	TAIR10_pep_20101214_contaminants.fasta	20001.5	1	5	8	13	0.00857	0.395
201211Orbi_Dave_Gelsample2	Uncategorized Sample	BioSample 1	S35 (F021017)	| Symbols: | Cytidine/deoxycytidylate deaminase family protein | chr5:10044209-10045755 REVERSE LENGTH=185	AT5G28050.1,AT5G28050.2	TAIR10_pep_20101214_contaminants.fasta	20001.5	1	10	15	28	0.0218	0.67
201211Orbi_Dave_Gelsample2	Uncategorized Sample	BioSample 1	S37 (F021019)	| Symbols: | Cytidine/deoxycytidylate deaminase family protein | chr5:10044209-10045755 REVERSE LENGTH=185	AT5G28050.1,AT5G28050.2	TAIR10_pep_20101214_contaminants.fasta	20001.5	1	5	6	12	0.0094	0.308
201210Orbi_Dave_Gelsample (1)	Uncategorized Sample	BioSample 1	P38 (F020919)	| Symbols: GME | GDP-D-mannose 3',5'-epimerase | chr5:10862472-10864024 REVERSE LENGTH=377	AT5G28840.1,AT5G28840.2	TAIR10_pep_20101214_contaminants.fasta	42759.5	1	8	10	15	0.0104	0.292
201210Orbi_Dave_Gelsample (1)	Uncategorized Sample	BioSample 1	P40 (F020921)	| Symbols: GME | GDP-D-mannose 3',5'-epimerase | chr5:10862472-10864024 REVERSE LENGTH=377	AT5G28840.1,AT5G28840.2	TAIR10_pep_20101214_contaminants.fasta	42759.5	1	9	12	20	0.0111	0.286
201210Orbi_Dave_Gelsample (1)	Uncategorized Sample	BioSample 1	P43 (F020924)	| Symbols: GME | GDP-D-mannose 3',5'-epimerase | chr5:10862472-10864024 REVERSE LENGTH=377	AT5G28840.1,AT5G28840.2	TAIR10_pep_20101214_contaminants.fasta	42759.5	1	4	4	6	0.0031	0.138
201211Orbi_Dave_Gelsample2	Uncategorized Sample	BioSample 1	S55 (F021052)	| Symbols: GME | GDP-D-mannose 3',5'-epimerase | chr5:10862472-10864024 REVERSE LENGTH=377	AT5G28840.1,AT5G28840.2	TAIR10_pep_20101214_contaminants.fasta	42759.5	1	7	7	12	0.00808	0.194
201210Orbi_Dave_Gelsample (1)	Uncategorized Sample	BioSample 1	P35 (F020917)	| Symbols: RPS1, ARRPS1 | ribosomal protein S1 | chr5:11619262-11621223 REVERSE LENGTH=416	AT5G30510.1	TAIR10_pep_20101214_contaminants.fasta	45111.1	1	3	4	7	0.0066	0.0962
201210Orbi_Dave_Gelsample (1)	Uncategorized Sample	BioSample 1	P41 (F020922)	| Symbols: RPS1, ARRPS1 | ribosomal protein S1 | chr5:11619262-11621223 REVERSE LENGTH=416	AT5G30510.1	TAIR10_pep_20101214_contaminants.fasta	45111.1	1	21	26	52	0.0373	0.474
201210Orbi_Dave_Gelsample (1)	Uncategorized Sample	BioSample 1	P42 (F020923)	| Symbols: RPS1, ARRPS1 | ribosomal protein S1 | chr5:11619262-11621223 REVERSE LENGTH=416	AT5G30510.1	TAIR10_pep_20101214_contaminants.fasta	45111.1	1	8	10	15	0.0116	0.219
201210Orbi_Dave_Gelsample (1)	Uncategorized Sample	BioSample 1	P45 (F020926)	| Symbols: RPS1, ARRPS1 | ribosomal protein S1 | chr5:11619262-11621223 REVERSE LENGTH=416	AT5G30510.1	TAIR10_pep_20101214_contaminants.fasta	45111.1	1	6	7	10	0.0073	0.173
201211Orbi_Dave_Gelsample2	Uncategorized Sample	BioSample 1	S18 (F020994)	| Symbols: RPS1, ARRPS1 | ribosomal protein S1 | chr5:11619262-11621223 REVERSE LENGTH=416	AT5G30510.1	TAIR10_pep_20101214_contaminants.fasta	45111.1	1	3	3	3	0.00281	0.0817
201211Orbi_Dave_Gelsample2	Uncategorized Sample	BioSample 1	S50 (F021047)	| Symbols: RPS1, ARRPS1 | ribosomal protein S1 | chr5:11619262-11621223 REVERSE LENGTH=416	AT5G30510.1	TAIR10_pep_20101214_contaminants.fasta	45111.1	1	3	3	4	0.00436	0.177
201210Orbi_Dave_Gelsample (1)	Uncategorized Sample	BioSample 1	P37 (F020918)	| Symbols: ATPAP26, PAP26 | purple acid phosphatase 26 | chr5:13108475-13111217 REVERSE LENGTH=475	AT5G34850.1	TAIR10_pep_20101214_contaminants.fasta	55009.5	1	3	4	6	0.0044	0.114
201211Orbi_Dave_Gelsample2	Uncategorized Sample	BioSample 1	S57 (F021054)	| Symbols: ATPAP26, PAP26 | purple acid phosphatase 26 | chr5:13108475-13111217 REVERSE LENGTH=475	AT5G34850.1	TAIR10_pep_20101214_contaminants.fasta	55009.5	1	4	4	7	0.00447	0.124
201210Orbi_Dave_Gelsample (1)	Uncategorized Sample	BioSample 1	P39 (F020920)	| Symbols: GS2, GLN2, ATGSL1 | glutamine synthetase 2 | chr5:13831220-13833239 FORWARD LENGTH=430	AT5G35630.1,AT5G35630.2,AT5G35630.3	TAIR10_pep_20101214_contaminants.fasta	47411.3	1	9	11	18	0.0118	0.235
201210Orbi_Dave_Gelsample (1)	Uncategorized Sample	BioSample 1	P41 (F020922)	| Symbols: GS2, GLN2, ATGSL1 | glutamine synthetase 2 | chr5:13831220-13833239 FORWARD LENGTH=430	AT5G35630.1,AT5G35630.2,AT5G35630.3	TAIR10_pep_20101214_contaminants.fasta	47411.3	1	7	8	12	0.0086	0.167
201210Orbi_Dave_Gelsample (1)	Uncategorized Sample	BioSample 1	P42 (F020923)	| Symbols: GS2, GLN2, ATGSL1 | glutamine synthetase 2 | chr5:13831220-13833239 FORWARD LENGTH=430	AT5G35630.1,AT5G35630.2,AT5G35630.3	TAIR10_pep_20101214_contaminants.fasta	47411.3	1	5	6	9	0.007	0.116
201210Orbi_Dave_Gelsample (1)	Uncategorized Sample	BioSample 1	P43 (F020924)	| Symbols: GS2, GLN2, ATGSL1 | glutamine synthetase 2 | chr5:13831220-13833239 FORWARD LENGTH=430	AT5G35630.1,AT5G35630.2,AT5G35630.3	TAIR10_pep_20101214_contaminants.fasta	47411.3	1	8	9	12	0.0063	0.156
201210Orbi_Dave_Gelsample (1)	Uncategorized Sample	BioSample 1	P44 (F020925)	| Symbols: GS2, GLN2, ATGSL1 | glutamine synthetase 2 | chr5:13831220-13833239 FORWARD LENGTH=430	AT5G35630.1,AT5G35630.2,AT5G35630.3	TAIR10_pep_20101214_contaminants.fasta	47411.3	1	18	28	55	0.0311	0.363
201210Orbi_Dave_Gelsample (1)	Uncategorized Sample	BioSample 1	P52 (F020933)	| Symbols: GS2, GLN2, ATGSL1 | glutamine synthetase 2 | chr5:13831220-13833239 FORWARD LENGTH=430	AT5G35630.1,AT5G35630.2,AT5G35630.3	TAIR10_pep_20101214_contaminants.fasta	47411.3	1	2	2	3	0.0022	0.0535
201211Orbi_Dave_Gelsample2	Uncategorized Sample	BioSample 1	S03 (F020979)	| Symbols: GS2, GLN2, ATGSL1 | glutamine synthetase 2 | chr5:13831220-13833239 FORWARD LENGTH=430	AT5G35630.1,AT5G35630.2,AT5G35630.3	TAIR10_pep_20101214_contaminants.fasta	47411.3	1	9	9	17	0.0121	0.191
201211Orbi_Dave_Gelsample2	Uncategorized Sample	BioSample 1	S50 (F021047)	| Symbols: GS2, GLN2, ATGSL1 | glutamine synthetase 2 | chr5:13831220-13833239 FORWARD LENGTH=430	AT5G35630.1,AT5G35630.2,AT5G35630.3	TAIR10_pep_20101214_contaminants.fasta	47411.3	1	17	22	34	0.0216	0.344
201211Orbi_Dave_Gelsample2	Uncategorized Sample	BioSample 1	S56 (F021053)	| Symbols: GS2, GLN2, ATGSL1 | glutamine synthetase 2 | chr5:13831220-13833239 FORWARD LENGTH=430	AT5G35630.1,AT5G35630.2,AT5G35630.3	TAIR10_pep_20101214_contaminants.fasta	47411.3	0.999	2	2	3	0.00251	0.0302
201210Orbi_Dave_Gelsample (1)	Uncategorized Sample	BioSample 1	P51 (F020932)	| Symbols: ATPGLP1, PGLP1 | 2-phosphoglycolate phosphatase 1 | chr5:14421929-14424430 REVERSE LENGTH=362	AT5G36700.1,AT5G36700.2,AT5G36700.4,AT5G36790.1,AT5G36790.2,AT5G36790.3	TAIR10_pep_20101214_contaminants.fasta	39762.9	1	18	25	58	0.0452	0.475
201211Orbi_Dave_Gelsample2	Uncategorized Sample	BioSample 1	S18 (F020994)	| Symbols: ATPGLP1, PGLP1 | 2-phosphoglycolate phosphatase 1 | chr5:14421929-14424430 REVERSE LENGTH=362	AT5G36700.1,AT5G36700.2,AT5G36700.4,AT5G36790.1,AT5G36790.2,AT5G36790.3	TAIR10_pep_20101214_contaminants.fasta	39762.9	1	9	11	21	0.0197	0.282
201211Orbi_Dave_Gelsample2	Uncategorized Sample	BioSample 1	S22 (F020998)	| Symbols: ATPGLP1, PGLP1 | 2-phosphoglycolate phosphatase 1 | chr5:14421929-14424430 REVERSE LENGTH=362	AT5G36700.1,AT5G36700.2,AT5G36700.4,AT5G36790.1,AT5G36790.2,AT5G36790.3	TAIR10_pep_20101214_contaminants.fasta	39762.9	1	10	10	20	0.0155	0.254
201211Orbi_Dave_Gelsample2	Uncategorized Sample	BioSample 1	S50 (F021047)	| Symbols: ATPGLP1, PGLP1 | 2-phosphoglycolate phosphatase 1 | chr5:14421929-14424430 REVERSE LENGTH=362	AT5G36700.1,AT5G36700.2,AT5G36700.4,AT5G36790.1,AT5G36790.2,AT5G36790.3	TAIR10_pep_20101214_contaminants.fasta	39762.9	1	4	4	6	0.00381	0.11
201211Orbi_Dave_Gelsample2	Uncategorized Sample	BioSample 1	S58 (F021055)	| Symbols: ATPGLP1, PGLP1 | 2-phosphoglycolate phosphatase 1 | chr5:14421929-14424430 REVERSE LENGTH=362	AT5G36700.1,AT5G36700.2,AT5G36700.4,AT5G36790.1,AT5G36790.2,AT5G36790.3	TAIR10_pep_20101214_contaminants.fasta	39762.9	1	3	3	6	0.00479	0.0884
201210Orbi_Dave_Gelsample (1)	Uncategorized Sample	BioSample 1	P51 (F020932)	| Symbols: | unknown protein; FUNCTIONS IN: molecular_function unknown; INVOLVED IN: biological_process unknown; LOCATED IN: chloroplast thylakoid membrane, chloroplast; EXPRESSED IN: 23 plant structures; EXPRESSED DURING: 13 growth stages; Has 1807 Blast hits to 1807 proteins in 277 species: Archae - 0; Bacteria - 0; Metazoa - 736; Fungi - 347; Plants - 385; Viruses - 0; Other Eukaryotes - 339 (…	AT5G37360.1	TAIR10_pep_20101214_contaminants.fasta	33441.3	0.998	2	2	8	0.00749	0.148
201211Orbi_Dave_Gelsample2	Uncategorized Sample	BioSample 1	S25 (F021001)	| Symbols: | unknown protein; FUNCTIONS IN: molecular_function unknown; INVOLVED IN: biological_process unknown; LOCATED IN: chloroplast thylakoid membrane, chloroplast; EXPRESSED IN: 23 plant structures; EXPRESSED DURING: 13 growth stages; Has 1807 Blast hits to 1807 proteins in 277 species: Archae - 0; Bacteria - 0; Metazoa - 736; Fungi - 347; Plants - 385; Viruses - 0; Other Eukaryotes - 339 (…	AT5G37360.1	TAIR10_pep_20101214_contaminants.fasta	33441.3	1	6	6	7	0.00527	0.166
201211Orbi_Dave_Gelsample2	Uncategorized Sample	BioSample 1	S30 (F021012)	| Symbols: | Ribulose bisphosphate carboxylase (small chain) family protein | chr5:15377501-15378306 REVERSE LENGTH=181	AT5G38410.1,AT5G38410.2,AT5G38410.3,AT5G38420.1	TAIR10_pep_20101214_contaminants.fasta	20350.6	1	3	3	3	0.00259	0.16
201211Orbi_Dave_Gelsample2	Uncategorized Sample	BioSample 1	S38 (F021020)	| Symbols: | Ribulose bisphosphate carboxylase (small chain) family protein | chr5:15377501-15378306 REVERSE LENGTH=181	AT5G38410.1,AT5G38410.2,AT5G38410.3,AT5G38420.1	TAIR10_pep_20101214_contaminants.fasta	20350.6	1	3	3	7	0.0107	0.26
201211Orbi_Dave_Gelsample2	Uncategorized Sample	BioSample 1	S47 (F021044)	| Symbols: | Ribulose bisphosphate carboxylase (small chain) family protein | chr5:15377501-15378306 REVERSE LENGTH=181	AT5G38410.1,AT5G38410.2,AT5G38410.3,AT5G38420.1	TAIR10_pep_20101214_contaminants.fasta	20350.6	1	4	4	15	0.0316	0.403
201211Orbi_Dave_Gelsample2	Uncategorized Sample	BioSample 1	S49 (F021046)	| Symbols: | Ribulose bisphosphate carboxylase (small chain) family protein | chr5:15377501-15378306 REVERSE LENGTH=181	AT5G38410.1,AT5G38410.2,AT5G38410.3,AT5G38420.1	TAIR10_pep_20101214_contaminants.fasta	20350.6	1	7	8	7	0.00763	0.16
201211Orbi_Dave_Gelsample2	Uncategorized Sample	BioSample 1	S54 (F021051)	| Symbols: | Ribulose bisphosphate carboxylase (small chain) family protein | chr5:15377501-15378306 REVERSE LENGTH=181	AT5G38410.1,AT5G38410.2,AT5G38410.3,AT5G38420.1	TAIR10_pep_20101214_contaminants.fasta	20350.6	1	3	3	2	0.002	0.541
201210Orbi_Dave_Gelsample (1)	Uncategorized Sample	BioSample 1	P73 (F020954)	| Symbols: | Ribulose bisphosphate carboxylase (small chain) family protein | chr5:15377501-15378306 REVERSE LENGTH=181	AT5G38410.1,AT5G38410.3,AT5G38420.1	TAIR10_pep_20101214_contaminants.fasta	20350.6	1	4	4	5	0.0056	0.425
201210Orbi_Dave_Gelsample (1)	Uncategorized Sample	BioSample 1	P75 (F020956)	| Symbols: | Ribulose bisphosphate carboxylase (small chain) family protein | chr5:15377501-15378306 REVERSE LENGTH=181	AT5G38410.1,AT5G38410.3,AT5G38420.1	TAIR10_pep_20101214_contaminants.fasta	20350.6	1	3	3	4	0.004	0.442
201210Orbi_Dave_Gelsample (1)	Uncategorized Sample	BioSample 1	P75 (F020956)	| Symbols: | Ribulose bisphosphate carboxylase (small chain) family protein | chr5:15384350-15385155 REVERSE LENGTH=181	AT5G38430.1	TAIR10_pep_20101214_contaminants.fasta	20286.6	0.998	2	2	3	0.00212	0.16
201210Orbi_Dave_Gelsample (1)	Uncategorized Sample	BioSample 1	P48 (F020929)	| Symbols: | Metal-dependent protein hydrolase | chr5:16791198-16792961 FORWARD LENGTH=373	AT5G41970.1	TAIR10_pep_20101214_contaminants.fasta	42299.8	0.998	2	2	6	0.0036	0.119
201211Orbi_Dave_Gelsample2	Uncategorized Sample	BioSample 1	S14 (F020990)	| Symbols: | Metal-dependent protein hydrolase | chr5:16791198-16792961 FORWARD LENGTH=373	AT5G41970.1	TAIR10_pep_20101214_contaminants.fasta	42299.8	1	5	5	8	0.00602	0.123
201210Orbi_Dave_Gelsample (1)	Uncategorized Sample	BioSample 1	P40 (F020921)	| Symbols: HOT5, ADH2, GSNOR, ATGSNOR1, PAR2 | GroES-like zinc-binding dehydrogenase family protein | chr5:17684265-17686379 FORWARD LENGTH=379	AT5G43940.1	TAIR10_pep_20101214_contaminants.fasta	40697.8	0.998	2	2	3	0.0017	0.0501
201210Orbi_Dave_Gelsample (1)	Uncategorized Sample	BioSample 1	P43 (F020924)	| Symbols: HOT5, ADH2, GSNOR, ATGSNOR1, PAR2 | GroES-like zinc-binding dehydrogenase family protein | chr5:17684265-17686379 FORWARD LENGTH=379	AT5G43940.1	TAIR10_pep_20101214_contaminants.fasta	40697.8	1	16	21	38	0.0199	0.483
201211Orbi_Dave_Gelsample2	Uncategorized Sample	BioSample 1	S10 (F020986)	| Symbols: HOT5, ADH2, GSNOR, ATGSNOR1, PAR2 | GroES-like zinc-binding dehydrogenase family protein | chr5:17684265-17686379 FORWARD LENGTH=379	AT5G43940.1	TAIR10_pep_20101214_contaminants.fasta	40697.8	1	10	12	27	0.0204	0.317
201210Orbi_Dave_Gelsample (1)	Uncategorized Sample	BioSample 1	P45 (F020926)	| Symbols: CHLI2, CHL I2, CHLI-2 | magnesium chelatase i2 | chr5:18628095-18629565 FORWARD LENGTH=418	AT5G45930.1	TAIR10_pep_20101214_contaminants.fasta	46098.3	1	22	26	67	0.0489	0.589
201211Orbi_Dave_Gelsample2	Uncategorized Sample	BioSample 1	S12 (F020988)	| Symbols: CHLI2, CHL I2, CHLI-2 | magnesium chelatase i2 | chr5:18628095-18629565 FORWARD LENGTH=418	AT5G45930.1	TAIR10_pep_20101214_contaminants.fasta	46098.3	1	15	15	34	0.0235	0.409
201210Orbi_Dave_Gelsample (1)	Uncategorized Sample	BioSample 1	P40 (F020921)	| Symbols: DELTA-OAT | ornithine-delta-aminotransferase | chr5:18718766-18721271 REVERSE LENGTH=475	AT5G46180.1	TAIR10_pep_20101214_contaminants.fasta	52179.5	1	3	3	4	0.0022	0.0779
201210Orbi_Dave_Gelsample (1)	Uncategorized Sample	BioSample 1	P43 (F020924)	| Symbols: DELTA-OAT | ornithine-delta-aminotransferase | chr5:18718766-18721271 REVERSE LENGTH=475	AT5G46180.1	TAIR10_pep_20101214_contaminants.fasta	52179.5	1	10	10	15	0.0078	0.236
201211Orbi_Dave_Gelsample2	Uncategorized Sample	BioSample 1	S55 (F021052)	| Symbols: DELTA-OAT | ornithine-delta-aminotransferase | chr5:18718766-18721271 REVERSE LENGTH=475	AT5G46180.1	TAIR10_pep_20101214_contaminants.fasta	52179.5	1	6	6	11	0.0074	0.137
201210Orbi_Dave_Gelsample (1)	Uncategorized Sample	BioSample 1	P63 (F020944)	| Symbols: | ATPase, F1 complex, delta/epsilon subunit | chr5:19090384-19092034 FORWARD LENGTH=203	AT5G47030.1	TAIR10_pep_20101214_contaminants.fasta	21547.8	1	4	4	5	0.0042	0.261
201211Orbi_Dave_Gelsample2	Uncategorized Sample	BioSample 1	S39 (F021021)	| Symbols: | ATPase, F1 complex, delta/epsilon subunit | chr5:19090384-19092034 FORWARD LENGTH=203	AT5G47030.1	TAIR10_pep_20101214_contaminants.fasta	21547.8	1	3	3	4	0.00372	0.167
201210Orbi_Dave_Gelsample (1)	Uncategorized Sample	BioSample 1	P61 (F020942)	| Symbols: ATRABD2B, ATRAB1A, RAB1A | RAB GTPase homolog 1A | chr5:19167029-19168718 FORWARD LENGTH=202	AT5G47200.1	TAIR10_pep_20101214_contaminants.fasta	22313.8	1	3	3	5	0.0036	0.0819
201211Orbi_Dave_Gelsample2	Uncategorized Sample	BioSample 1	S37 (F021019)	| Symbols: ATRABD2B, ATRAB1A, RAB1A | RAB GTPase homolog 1A | chr5:19167029-19168718 FORWARD LENGTH=202	AT5G47200.1	TAIR10_pep_20101214_contaminants.fasta	22313.8	1	2	2	4	0.0038	0.218
201211Orbi_Dave_Gelsample2	Uncategorized Sample	BioSample 1	S39 (F021021)	| Symbols: ATRABD2B, ATRAB1A, RAB1A | RAB GTPase homolog 1A | chr5:19167029-19168718 FORWARD LENGTH=202	AT5G47200.1	TAIR10_pep_20101214_contaminants.fasta	22313.8	1	2	2	3	0.00235	0.0842
201210Orbi_Dave_Gelsample (1)	Uncategorized Sample	BioSample 1	P14 (F020965)	| Symbols: NSP5 | nitrile specifier protein 5 | chr5:19541283-19542358 REVERSE LENGTH=326	AT5G48180.1	TAIR10_pep_20101214_contaminants.fasta	35852.4	0.998	2	2	3	0.0042	0.0675
201210Orbi_Dave_Gelsample (1)	Uncategorized Sample	BioSample 1	P44 (F020925)	| Symbols: NSP5 | nitrile specifier protein 5 | chr5:19541283-19542358 REVERSE LENGTH=326	AT5G48180.1	TAIR10_pep_20101214_contaminants.fasta	35852.4	0.998	2	2	2	0.0011	0.0644
201211Orbi_Dave_Gelsample2	Uncategorized Sample	BioSample 1	S18 (F020994)	| Symbols: NSP5 | nitrile specifier protein 5 | chr5:19541283-19542358 REVERSE LENGTH=326	AT5G48180.1	TAIR10_pep_20101214_contaminants.fasta	35852.4	1	3	3	5	0.00468	0.107
201211Orbi_Dave_Gelsample2	Uncategorized Sample	BioSample 1	S51 (F021048)	| Symbols: NSP5 | nitrile specifier protein 5 | chr5:19541283-19542358 REVERSE LENGTH=326	AT5G48180.1	TAIR10_pep_20101214_contaminants.fasta	35852.4	1	7	7	12	0.00954	0.264
201211Orbi_Dave_Gelsample2	Uncategorized Sample	BioSample 1	S58 (F021055)	| Symbols: NSP5 | nitrile specifier protein 5 | chr5:19541283-19542358 REVERSE LENGTH=326	AT5G48180.1	TAIR10_pep_20101214_contaminants.fasta	35852.4	1	9	12	21	0.0168	0.325
201210Orbi_Dave_Gelsample (1)	Uncategorized Sample	BioSample 1	P05 (F020904)	| Symbols: CLPC, ATHSP93-V, HSP93-V, DCA1, CLPC1 | CLPC homologue 1 | chr5:20715710-20719800 REVERSE LENGTH=929	AT5G50920.1	TAIR10_pep_20101214_contaminants.fasta	103456	1	3	3	4	0.0031	0.0431
201210Orbi_Dave_Gelsample (1)	Uncategorized Sample	BioSample 1	P06 (F020905)	| Symbols: CLPC, ATHSP93-V, HSP93-V, DCA1, CLPC1 | CLPC homologue 1 | chr5:20715710-20719800 REVERSE LENGTH=929	AT5G50920.1	TAIR10_pep_20101214_contaminants.fasta	103456	0.998	2	2	2	0.0013	0.0248
201210Orbi_Dave_Gelsample (1)	Uncategorized Sample	BioSample 1	P21 (F020886)	| Symbols: CLPC, ATHSP93-V, HSP93-V, DCA1, CLPC1 | CLPC homologue 1 | chr5:20715710-20719800 REVERSE LENGTH=929	AT5G50920.1	TAIR10_pep_20101214_contaminants.fasta	103456	1	4	4	6	0.0047	0.0388
201210Orbi_Dave_Gelsample (1)	Uncategorized Sample	BioSample 1	P22 (F020887)	| Symbols: CLPC, ATHSP93-V, HSP93-V, DCA1, CLPC1 | CLPC homologue 1 | chr5:20715710-20719800 REVERSE LENGTH=929	AT5G50920.1	TAIR10_pep_20101214_contaminants.fasta	103456	1	3	3	4	0.0035	0.0301
201211Orbi_Dave_Gelsample2	Uncategorized Sample	BioSample 1	S01 (F020977)	| Symbols: CLPC, ATHSP93-V, HSP93-V, DCA1, CLPC1 | CLPC homologue 1 | chr5:20715710-20719800 REVERSE LENGTH=929	AT5G50920.1	TAIR10_pep_20101214_contaminants.fasta	103456	1	18	19	43	0.0504	0.233
201211Orbi_Dave_Gelsample2	Uncategorized Sample	BioSample 1	S02 (F020978)	| Symbols: CLPC, ATHSP93-V, HSP93-V, DCA1, CLPC1 | CLPC homologue 1 | chr5:20715710-20719800 REVERSE LENGTH=929	AT5G50920.1	TAIR10_pep_20101214_contaminants.fasta	103456	1	50	62	148	0.128	0.493
201211Orbi_Dave_Gelsample2	Uncategorized Sample	BioSample 1	S03 (F020979)	| Symbols: CLPC, ATHSP93-V, HSP93-V, DCA1, CLPC1 | CLPC homologue 1 | chr5:20715710-20719800 REVERSE LENGTH=929	AT5G50920.1	TAIR10_pep_20101214_contaminants.fasta	103456	1	16	16	35	0.0249	0.172
201211Orbi_Dave_Gelsample2	Uncategorized Sample	BioSample 1	S04 (F020980)	| Symbols: CLPC, ATHSP93-V, HSP93-V, DCA1, CLPC1 | CLPC homologue 1 | chr5:20715710-20719800 REVERSE LENGTH=929	AT5G50920.1	TAIR10_pep_20101214_contaminants.fasta	103456	1	2	2	2	0.00129	0.0258
201210Orbi_Dave_Gelsample (1)	Uncategorized Sample	BioSample 1	P46 (F020927)	| Symbols: NBP35, ATNBP35 | nucleotide binding protein 35 | chr5:20734267-20735824 FORWARD LENGTH=350	AT5G50960.1	TAIR10_pep_20101214_contaminants.fasta	37305.8	1	6	8	11	0.0078	0.209
201211Orbi_Dave_Gelsample2	Uncategorized Sample	BioSample 1	S12 (F020988)	| Symbols: NBP35, ATNBP35 | nucleotide binding protein 35 | chr5:20734267-20735824 FORWARD LENGTH=350	AT5G50960.1	TAIR10_pep_20101214_contaminants.fasta	37305.8	1	8	10	17	0.0118	0.309
201210Orbi_Dave_Gelsample (1)	Uncategorized Sample	BioSample 1	P38 (F020919)	| Symbols: | GroES-like zinc-binding alcohol dehydrogenase family protein | chr5:21111820-21113284 FORWARD LENGTH=364	AT5G51970.1,AT5G51970.2	TAIR10_pep_20101214_contaminants.fasta	39254.2	1	8	8	11	0.0076	0.374
201210Orbi_Dave_Gelsample (1)	Uncategorized Sample	BioSample 1	P40 (F020921)	| Symbols: | GroES-like zinc-binding alcohol dehydrogenase family protein | chr5:21111820-21113284 FORWARD LENGTH=364	AT5G51970.1,AT5G51970.2	TAIR10_pep_20101214_contaminants.fasta	39254.2	1	10	12	24	0.0133	0.291
201211Orbi_Dave_Gelsample2	Uncategorized Sample	BioSample 1	S55 (F021052)	| Symbols: | GroES-like zinc-binding alcohol dehydrogenase family protein | chr5:21111820-21113284 FORWARD LENGTH=364	AT5G51970.1,AT5G51970.2	TAIR10_pep_20101214_contaminants.fasta	39254.2	1	11	11	19	0.0128	0.401
201210Orbi_Dave_Gelsample (1)	Uncategorized Sample	BioSample 1	P33 (F020915)	| Symbols: PKP1, PKP-BETA1, PKP2 | plastidic pyruvate kinase beta subunit 1 | chr5:21463680-21466612 FORWARD LENGTH=579	AT5G52920.1	TAIR10_pep_20101214_contaminants.fasta	63521.3	1	10	12	15	0.0106	0.301
201210Orbi_Dave_Gelsample (1)	Uncategorized Sample	BioSample 1	P34 (F020916)	| Symbols: PKP1, PKP-BETA1, PKP2 | plastidic pyruvate kinase beta subunit 1 | chr5:21463680-21466612 FORWARD LENGTH=579	AT5G52920.1	TAIR10_pep_20101214_contaminants.fasta	63521.3	1	5	5	7	0.0058	0.166
201210Orbi_Dave_Gelsample (1)	Uncategorized Sample	BioSample 1	P37 (F020918)	| Symbols: PKP1, PKP-BETA1, PKP2 | plastidic pyruvate kinase beta subunit 1 | chr5:21463680-21466612 FORWARD LENGTH=579	AT5G52920.1	TAIR10_pep_20101214_contaminants.fasta	63521.3	0.998	2	2	4	0.0029	0.0363
201211Orbi_Dave_Gelsample2	Uncategorized Sample	BioSample 1	S08 (F020984)	| Symbols: PKP1, PKP-BETA1, PKP2 | plastidic pyruvate kinase beta subunit 1 | chr5:21463680-21466612 FORWARD LENGTH=579	AT5G52920.1	TAIR10_pep_20101214_contaminants.fasta	63521.3	1	13	13	25	0.0165	0.307
201211Orbi_Dave_Gelsample2	Uncategorized Sample	BioSample 1	S09 (F020985)	| Symbols: PKP1, PKP-BETA1, PKP2 | plastidic pyruvate kinase beta subunit 1 | chr5:21463680-21466612 FORWARD LENGTH=579	AT5G52920.1	TAIR10_pep_20101214_contaminants.fasta	63521.3	1	3	3	5	0.00331	0.0622
201211Orbi_Dave_Gelsample2	Uncategorized Sample	BioSample 1	S57 (F021054)	| Symbols: PKP1, PKP-BETA1, PKP2 | plastidic pyruvate kinase beta subunit 1 | chr5:21463680-21466612 FORWARD LENGTH=579	AT5G52920.1	TAIR10_pep_20101214_contaminants.fasta	63521.3	1	2	2	4	0.00255	0.0363
201210Orbi_Dave_Gelsample (1)	Uncategorized Sample	BioSample 1	P46 (F020927)	| Symbols: LHCB3, LHCB3*1 | light-harvesting chlorophyll B-binding protein 3 | chr5:22038424-22039383 FORWARD LENGTH=265	AT5G54270.1	TAIR10_pep_20101214_contaminants.fasta	28707.4	1	3	5	9	0.0064	0.132
201211Orbi_Dave_Gelsample2	Uncategorized Sample	BioSample 1	S12 (F020988)	| Symbols: LHCB3, LHCB3*1 | light-harvesting chlorophyll B-binding protein 3 | chr5:22038424-22039383 FORWARD LENGTH=265	AT5G54270.1	TAIR10_pep_20101214_contaminants.fasta	28707.4	1	3	4	7	0.00485	0.132
201211Orbi_Dave_Gelsample2	Uncategorized Sample	BioSample 1	S15 (F020991)	| Symbols: LHCB3, LHCB3*1 | light-harvesting chlorophyll B-binding protein 3 | chr5:22038424-22039383 FORWARD LENGTH=265	AT5G54270.1	TAIR10_pep_20101214_contaminants.fasta	28707.4	1	4	5	17	0.0203	0.268
201210Orbi_Dave_Gelsample (1)	Uncategorized Sample	BioSample 1	P53 (F020934)	| Symbols: ATPHOS32, PHOS32 | Adenine nucleotide alpha hydrolases-like superfamily protein | chr5:22097563-22099693 REVERSE LENGTH=242	AT5G54430.1	TAIR10_pep_20101214_contaminants.fasta	26201.8	1	6	6	12	0.0078	0.5
201210Orbi_Dave_Gelsample (1)	Uncategorized Sample	BioSample 1	P54 (F020935)	| Symbols: ATPHOS32, PHOS32 | Adenine nucleotide alpha hydrolases-like superfamily protein | chr5:22097563-22099693 REVERSE LENGTH=242	AT5G54430.1	TAIR10_pep_20101214_contaminants.fasta	26201.8	1	7	7	12	0.0091	0.256
201211Orbi_Dave_Gelsample2	Uncategorized Sample	BioSample 1	S20 (F020996)	| Symbols: ATPHOS32, PHOS32 | Adenine nucleotide alpha hydrolases-like superfamily protein | chr5:22097563-22099693 REVERSE LENGTH=242	AT5G54430.1	TAIR10_pep_20101214_contaminants.fasta	26201.8	1	6	6	6	0.0047	0.138
201210Orbi_Dave_Gelsample (1)	Uncategorized Sample	BioSample 1	P51 (F020932)	| Symbols: THI1, TZ, THI4 | thiazole biosynthetic enzyme, chloroplast (ARA6) (THI1) (THI4) | chr5:22246634-22247891 FORWARD LENGTH=349	AT5G54770.1	TAIR10_pep_20101214_contaminants.fasta	36664.4	1	7	8	19	0.0148	0.281
201210Orbi_Dave_Gelsample (1)	Uncategorized Sample	BioSample 1	P52 (F020933)	| Symbols: THI1, TZ, THI4 | thiazole biosynthetic enzyme, chloroplast (ARA6) (THI1) (THI4) | chr5:22246634-22247891 FORWARD LENGTH=349	AT5G54770.1	TAIR10_pep_20101214_contaminants.fasta	36664.4	1	14	21	144	0.107	0.625
201210Orbi_Dave_Gelsample (1)	Uncategorized Sample	BioSample 1	P55 (F020936)	| Symbols: THI1, TZ, THI4 | thiazole biosynthetic enzyme, chloroplast (ARA6) (THI1) (THI4) | chr5:22246634-22247891 FORWARD LENGTH=349	AT5G54770.1	TAIR10_pep_20101214_contaminants.fasta	36664.4	1	5	6	9	0.0072	0.169
201210Orbi_Dave_Gelsample (1)	Uncategorized Sample	BioSample 1	P57 (F020938)	| Symbols: THI1, TZ, THI4 | thiazole biosynthetic enzyme, chloroplast (ARA6) (THI1) (THI4) | chr5:22246634-22247891 FORWARD LENGTH=349	AT5G54770.1	TAIR10_pep_20101214_contaminants.fasta	36664.4	1	15	24	137	0.0879	0.567
201211Orbi_Dave_Gelsample2	Uncategorized Sample	BioSample 1	S24 (F021000)	| Symbols: THI1, TZ, THI4 | thiazole biosynthetic enzyme, chloroplast (ARA6) (THI1) (THI4) | chr5:22246634-22247891 FORWARD LENGTH=349	AT5G54770.1	TAIR10_pep_20101214_contaminants.fasta	36664.4	1	6	8	17	0.0118	0.232
201211Orbi_Dave_Gelsample2	Uncategorized Sample	BioSample 1	S31 (F021013)	| Symbols: THI1, TZ, THI4 | thiazole biosynthetic enzyme, chloroplast (ARA6) (THI1) (THI4) | chr5:22246634-22247891 FORWARD LENGTH=349	AT5G54770.1	TAIR10_pep_20101214_contaminants.fasta	36664.4	1	3	4	6	0.00461	0.158
201210Orbi_Dave_Gelsample (1)	Uncategorized Sample	BioSample 1	P37 (F020918)	| Symbols: | Pyruvate kinase family protein | chr5:22820254-22822529 REVERSE LENGTH=498	AT5G56350.1	TAIR10_pep_20101214_contaminants.fasta	54412.1	0.998	2	2	7	0.00653	0.122
201211Orbi_Dave_Gelsample2	Uncategorized Sample	BioSample 1	S06 (F020982)	| Symbols: | Pyruvate kinase family protein | chr5:22820254-22822529 REVERSE LENGTH=498	AT5G56350.1	TAIR10_pep_20101214_contaminants.fasta	54412.1	1	4	4	15	0.0124	0.208
201211Orbi_Dave_Gelsample2	Uncategorized Sample	BioSample 1	S57 (F021054)	| Symbols: | Pyruvate kinase family protein | chr5:22820254-22822529 REVERSE LENGTH=498	AT5G56350.1	TAIR10_pep_20101214_contaminants.fasta	54412.1	1	4	4	27	0.0179	0.302
201210Orbi_Dave_Gelsample (1)	Uncategorized Sample	BioSample 1	P25 (F020908)	| Symbols: eIFiso4G1 | MIF4G domain-containing protein / MA3 domain-containing protein | chr5:23439755-23443433 FORWARD LENGTH=780	AT5G57870.1	TAIR10_pep_20101214_contaminants.fasta	85573.8	1	6	6	6	0.0067	0.0833
201211Orbi_Dave_Gelsample2	Uncategorized Sample	BioSample 1	S04 (F020980)	| Symbols: eIFiso4G1 | MIF4G domain-containing protein / MA3 domain-containing protein | chr5:23439755-23443433 FORWARD LENGTH=780	AT5G57870.1,AT5G57870.2	TAIR10_pep_20101214_contaminants.fasta	85573.8	1	4	4	2	0.0022	0.0281
201210Orbi_Dave_Gelsample (1)	Uncategorized Sample	BioSample 1	P39 (F020920)	| Symbols: | lactate/malate dehydrogenase family protein | chr5:23580010-23582287 REVERSE LENGTH=443	AT5G58330.1,AT5G58330.2	TAIR10_pep_20101214_contaminants.fasta	48230.2	0.998	2	2	6	0.004	0.16
201210Orbi_Dave_Gelsample (1)	Uncategorized Sample	BioSample 1	P41 (F020922)	| Symbols: | lactate/malate dehydrogenase family protein | chr5:23580010-23582287 REVERSE LENGTH=443	AT5G58330.1,AT5G58330.2	TAIR10_pep_20101214_contaminants.fasta	48230.2	1	2	3	9	0.0054	0.214
201210Orbi_Dave_Gelsample (1)	Uncategorized Sample	BioSample 1	P42 (F020923)	| Symbols: | lactate/malate dehydrogenase family protein | chr5:23580010-23582287 REVERSE LENGTH=443	AT5G58330.1,AT5G58330.2	TAIR10_pep_20101214_contaminants.fasta	48230.2	1	5	8	3	0.0027	0.136
201210Orbi_Dave_Gelsample (1)	Uncategorized Sample	BioSample 1	P43 (F020924)	| Symbols: | lactate/malate dehydrogenase family protein | chr5:23580010-23582287 REVERSE LENGTH=443	AT5G58330.1,AT5G58330.2	TAIR10_pep_20101214_contaminants.fasta	48230.2	1	17	22	52	0.0353	0.62
201210Orbi_Dave_Gelsample (1)	Uncategorized Sample	BioSample 1	P44 (F020925)	| Symbols: | lactate/malate dehydrogenase family protein | chr5:23580010-23582287 REVERSE LENGTH=443	AT5G58330.1,AT5G58330.2	TAIR10_pep_20101214_contaminants.fasta	48230.2	1	18	25	4	0.00282	0.0753
201211Orbi_Dave_Gelsample2	Uncategorized Sample	BioSample 1	S50 (F021047)	| Symbols: | lactate/malate dehydrogenase family protein | chr5:23580010-23582287 REVERSE LENGTH=443	AT5G58330.1,AT5G58330.2	TAIR10_pep_20101214_contaminants.fasta	48230.2	1	17	22	31	0.0197	0.412
201210Orbi_Dave_Gelsample (1)	Uncategorized Sample	BioSample 1	P50 (F020931)	| Symbols: | NAD(P)-binding Rossmann-fold superfamily protein | chr5:23643068-23644455 FORWARD LENGTH=324	AT5G58490.1	TAIR10_pep_20101214_contaminants.fasta	35757.2	1	5	5	9	0.006	0.312
201211Orbi_Dave_Gelsample2	Uncategorized Sample	BioSample 1	S14 (F020990)	| Symbols: | NAD(P)-binding Rossmann-fold superfamily protein | chr5:23643068-23644455 FORWARD LENGTH=324	AT5G58490.1	TAIR10_pep_20101214_contaminants.fasta	35757.2	1	3	3	6	0.00526	0.178
201210Orbi_Dave_Gelsample (1)	Uncategorized Sample	BioSample 1	P58 (F020939)	| Symbols: RPE, EMB2728 | D-ribulose-5-phosphate-3-epimerase | chr5:24684085-24685836 REVERSE LENGTH=281	AT5G61410.1,AT5G61410.2	TAIR10_pep_20101214_contaminants.fasta	30008.5	1	5	5	7	0.0051	0.238
201210Orbi_Dave_Gelsample (1)	Uncategorized Sample	BioSample 1	P59 (F020940)	| Symbols: RPE, EMB2728 | D-ribulose-5-phosphate-3-epimerase | chr5:24684085-24685836 REVERSE LENGTH=281	AT5G61410.1,AT5G61410.2	TAIR10_pep_20101214_contaminants.fasta	30008.5	1	6	6	11	0.0098	0.306
201210Orbi_Dave_Gelsample (1)	Uncategorized Sample	BioSample 1	P60 (F020941)	| Symbols: RPE, EMB2728 | D-ribulose-5-phosphate-3-epimerase | chr5:24684085-24685836 REVERSE LENGTH=281	AT5G61410.1,AT5G61410.2	TAIR10_pep_20101214_contaminants.fasta	30008.5	1	3	3	6	0.0043	0.196
201211Orbi_Dave_Gelsample2	Uncategorized Sample	BioSample 1	S17 (F020993)	| Symbols: RPE, EMB2728 | D-ribulose-5-phosphate-3-epimerase | chr5:24684085-24685836 REVERSE LENGTH=281	AT5G61410.1,AT5G61410.2	TAIR10_pep_20101214_contaminants.fasta	30008.5	1	4	6	9	0.00634	0.171
201211Orbi_Dave_Gelsample2	Uncategorized Sample	BioSample 1	S28 (F021004)	| Symbols: RPE, EMB2728 | D-ribulose-5-phosphate-3-epimerase | chr5:24684085-24685836 REVERSE LENGTH=281	AT5G61410.1,AT5G61410.2	TAIR10_pep_20101214_contaminants.fasta	30008.5	0.999	2	2	3	0.00226	0.0783
201211Orbi_Dave_Gelsample2	Uncategorized Sample	BioSample 1	S30 (F021012)	| Symbols: RPE, EMB2728 | D-ribulose-5-phosphate-3-epimerase | chr5:24684085-24685836 REVERSE LENGTH=281	AT5G61410.1,AT5G61410.2	TAIR10_pep_20101214_contaminants.fasta	30008.5	1	4	5	7	0.00494	0.128
201211Orbi_Dave_Gelsample2	Uncategorized Sample	BioSample 1	S32 (F021014)	| Symbols: RPE, EMB2728 | D-ribulose-5-phosphate-3-epimerase | chr5:24684085-24685836 REVERSE LENGTH=281	AT5G61410.1,AT5G61410.2	TAIR10_pep_20101214_contaminants.fasta	30008.5	1	4	4	6	0.00396	0.0925
201210Orbi_Dave_Gelsample (1)	Uncategorized Sample	BioSample 1	P34 (F020916)	| Symbols: ALDH12A1, ATP5CDH, P5CDH | aldehyde dehydrogenase 12A1 | chr5:25099768-25103159 REVERSE LENGTH=556	AT5G62530.1	TAIR10_pep_20101214_contaminants.fasta	61774.2	1	3	3	4	0.0033	0.0809
201211Orbi_Dave_Gelsample2	Uncategorized Sample	BioSample 1	S08 (F020984)	| Symbols: ALDH12A1, ATP5CDH, P5CDH | aldehyde dehydrogenase 12A1 | chr5:25099768-25103159 REVERSE LENGTH=556	AT5G62530.1	TAIR10_pep_20101214_contaminants.fasta	61774.2	1	24	31	2	0.0015	0.0483
201211Orbi_Dave_Gelsample2	Uncategorized Sample	BioSample 1	S09 (F020985)	| Symbols: ALDH12A1, ATP5CDH, P5CDH | aldehyde dehydrogenase 12A1 | chr5:25099768-25103159 REVERSE LENGTH=556	AT5G62530.1	TAIR10_pep_20101214_contaminants.fasta	61774.2	1	13	16	14	0.00927	0.253
201210Orbi_Dave_Gelsample (1)	Uncategorized Sample	BioSample 1	P38 (F020919)	| Symbols: DXR, PDE129 | 1-deoxy-D-xylulose 5-phosphate reductoisomerase | chr5:25214358-25217292 REVERSE LENGTH=477	AT5G62790.1	TAIR10_pep_20101214_contaminants.fasta	51964.8	1	6	6	9	0.0062	0.136
201210Orbi_Dave_Gelsample (1)	Uncategorized Sample	BioSample 1	P40 (F020921)	| Symbols: DXR, PDE129 | 1-deoxy-D-xylulose 5-phosphate reductoisomerase | chr5:25214358-25217292 REVERSE LENGTH=477	AT5G62790.1	TAIR10_pep_20101214_contaminants.fasta	51964.8	1	13	14	29	0.0161	0.287
201211Orbi_Dave_Gelsample2	Uncategorized Sample	BioSample 1	S14 (F020990)	| Symbols: DXR, PDE129 | 1-deoxy-D-xylulose 5-phosphate reductoisomerase | chr5:25214358-25217292 REVERSE LENGTH=477	AT5G62790.1	TAIR10_pep_20101214_contaminants.fasta	51964.8	1	7	7	15	0.0113	0.184
201211Orbi_Dave_Gelsample2	Uncategorized Sample	BioSample 1	S55 (F021052)	| Symbols: DXR, PDE129 | 1-deoxy-D-xylulose 5-phosphate reductoisomerase | chr5:25214358-25217292 REVERSE LENGTH=477	AT5G62790.1	TAIR10_pep_20101214_contaminants.fasta	51964.8	1	20	21	39	0.0262	0.493
201210Orbi_Dave_Gelsample (1)	Uncategorized Sample	BioSample 1	P65 (F020946)	| Symbols: NDPK2, NDPK1A, NDPK IA IA, NDPK IA, ATNDPK2 | nucleoside diphosphate kinase 2 | chr5:25372122-25373838 REVERSE LENGTH=231	AT5G63310.1	TAIR10_pep_20101214_contaminants.fasta	25550.9	0.998	2	2	3	0.0025	0.0909
201210Orbi_Dave_Gelsample (1)	Uncategorized Sample	BioSample 1	P68 (F020949)	| Symbols: NDPK2, NDPK1A, NDPK IA IA, NDPK IA, ATNDPK2 | nucleoside diphosphate kinase 2 | chr5:25372122-25373838 REVERSE LENGTH=231	AT5G63310.1	TAIR10_pep_20101214_contaminants.fasta	25550.9	1	3	3	6	0.0069	0.13
201211Orbi_Dave_Gelsample2	Uncategorized Sample	BioSample 1	S59 (F021056)	| Symbols: NDPK2, NDPK1A, NDPK IA IA, NDPK IA, ATNDPK2 | nucleoside diphosphate kinase 2 | chr5:25372122-25373838 REVERSE LENGTH=231	AT5G63310.1	TAIR10_pep_20101214_contaminants.fasta	25550.9	1	3	3	5	0.00661	0.13
201210Orbi_Dave_Gelsample (1)	Uncategorized Sample	BioSample 1	P37 (F020918)	| Symbols: ATERS, OVA3, ERS | glutamate tRNA synthetase | chr5:25630196-25633099 REVERSE LENGTH=570	AT5G64050.1	TAIR10_pep_20101214_contaminants.fasta	63467.1	0.998	2	2	3	0.0022	0.0509
201211Orbi_Dave_Gelsample2	Uncategorized Sample	BioSample 1	S57 (F021054)	| Symbols: ATERS, OVA3, ERS | glutamate tRNA synthetase | chr5:25630196-25633099 REVERSE LENGTH=570	AT5G64050.1	TAIR10_pep_20101214_contaminants.fasta	63467.1	1	8	8	14	0.00893	0.144
201210Orbi_Dave_Gelsample (1)	Uncategorized Sample	BioSample 1	P38 (F020919)	| Symbols: BETA-UP, PYD3 | beta-ureidopropionase | chr5:25739264-25741031 FORWARD LENGTH=408	AT5G64370.1	TAIR10_pep_20101214_contaminants.fasta	45553.6	0.998	2	2	2	0.0014	0.0662
201211Orbi_Dave_Gelsample2	Uncategorized Sample	BioSample 1	S55 (F021052)	| Symbols: BETA-UP, PYD3 | beta-ureidopropionase | chr5:25739264-25741031 FORWARD LENGTH=408	AT5G64370.1	TAIR10_pep_20101214_contaminants.fasta	45553.6	1	9	9	16	0.0108	0.279
201210Orbi_Dave_Gelsample (1)	Uncategorized Sample	BioSample 1	P53 (F020934)	| Symbols: | Phosphoglycerate mutase family protein | chr5:25773009-25775104 REVERSE LENGTH=282	AT5G64460.1,AT5G64460.2,AT5G64460.3,AT5G64460.4,AT5G64460.6,AT5G64460.8	TAIR10_pep_20101214_contaminants.fasta	31599.2	1	7	8	14	0.0091	0.323
201210Orbi_Dave_Gelsample (1)	Uncategorized Sample	BioSample 1	P54 (F020935)	| Symbols: | Phosphoglycerate mutase family protein | chr5:25773009-25775104 REVERSE LENGTH=282	AT5G64460.1,AT5G64460.2,AT5G64460.3,AT5G64460.4,AT5G64460.6,AT5G64460.8	TAIR10_pep_20101214_contaminants.fasta	31599.2	1	8	9	17	0.0134	0.365
201211Orbi_Dave_Gelsample2	Uncategorized Sample	BioSample 1	S21 (F020997)	| Symbols: | Phosphoglycerate mutase family protein | chr5:25773009-25775104 REVERSE LENGTH=282	AT5G64460.1,AT5G64460.2,AT5G64460.3,AT5G64460.4,AT5G64460.6,AT5G64460.8	TAIR10_pep_20101214_contaminants.fasta	31599.2	1	5	6	10	0.00763	0.216
201210Orbi_Dave_Gelsample (1)	Uncategorized Sample	BioSample 1	P29 (F020912)	| Symbols: ASN2 | asparagine synthetase 2 | chr5:25969224-25972278 FORWARD LENGTH=578	AT5G65010.1,AT5G65010.2	TAIR10_pep_20101214_contaminants.fasta	65031.8	1	16	22	40	0.0233	0.407
201210Orbi_Dave_Gelsample (1)	Uncategorized Sample	BioSample 1	P32 (F020914)	| Symbols: ASN2 | asparagine synthetase 2 | chr5:25969224-25972278 FORWARD LENGTH=578	AT5G65010.1,AT5G65010.2	TAIR10_pep_20101214_contaminants.fasta	65031.8	1	4	5	7	0.0051	0.137
201210Orbi_Dave_Gelsample (1)	Uncategorized Sample	BioSample 1	P48 (F020929)	| Symbols: ATLFNR1, FNR1 | ferredoxin-NADP(+)-oxidoreductase 1 | chr5:26451203-26453012 REVERSE LENGTH=360	AT5G66190.1	TAIR10_pep_20101214_contaminants.fasta	40327.5	1	6	7	13	0.0097	0.264
201210Orbi_Dave_Gelsample (1)	Uncategorized Sample	BioSample 1	P50 (F020931)	| Symbols: ATLFNR1, FNR1 | ferredoxin-NADP(+)-oxidoreductase 1 | chr5:26451203-26453012 REVERSE LENGTH=360	AT5G66190.1	TAIR10_pep_20101214_contaminants.fasta	40327.5	1	8	9	2	0.0015	0.0461
201211Orbi_Dave_Gelsample2	Uncategorized Sample	BioSample 1	S14 (F020990)	| Symbols: ATLFNR1, FNR1 | ferredoxin-NADP(+)-oxidoreductase 1 | chr5:26451203-26453012 REVERSE LENGTH=360	AT5G66190.1,AT5G66190.2	TAIR10_pep_20101214_contaminants.fasta	40327.5	1	4	4	4	0.0026	0.168
201210Orbi_Dave_Gelsample (1)	Uncategorized Sample	BioSample 1	P51 (F020932)	| Symbols: | Galactose mutarotase-like superfamily protein | chr5:26553821-26555575 REVERSE LENGTH=307	AT5G66530.1,AT5G66530.2	TAIR10_pep_20101214_contaminants.fasta	33692.7	1	4	4	74	0.0502	0.458
201211Orbi_Dave_Gelsample2	Uncategorized Sample	BioSample 1	S51 (F021048)	| Symbols: | Galactose mutarotase-like superfamily protein | chr5:26553821-26555575 REVERSE LENGTH=307	AT5G66530.1,AT5G66530.2	TAIR10_pep_20101214_contaminants.fasta	33692.7	1	4	4	7	0.00556	0.147
201210Orbi_Dave_Gelsample (1)	Uncategorized Sample	BioSample 1	P51 (F020932)	| Symbols: PSBO-1, OEE1, OEE33, OE33, PSBO1, MSP-1 | PS II oxygen-evolving complex 1 | chr5:26568744-26570124 FORWARD LENGTH=332	AT5G66570.1	TAIR10_pep_20101214_contaminants.fasta	35142.8	1	10	11	19	0.0148	0.404
201211Orbi_Dave_Gelsample2	Uncategorized Sample	BioSample 1	S22 (F020998)	| Symbols: PSBO-1, OEE1, OEE33, OE33, PSBO1, MSP-1 | PS II oxygen-evolving complex 1 | chr5:26568744-26570124 FORWARD LENGTH=332	AT5G66570.1	TAIR10_pep_20101214_contaminants.fasta	35142.8	1	9	13	32	0.0247	0.566
201211Orbi_Dave_Gelsample2	Uncategorized Sample	BioSample 1	S23 (F020999)	| Symbols: PSBO-1, OEE1, OEE33, OE33, PSBO1, MSP-1 | PS II oxygen-evolving complex 1 | chr5:26568744-26570124 FORWARD LENGTH=332	AT5G66570.1	TAIR10_pep_20101214_contaminants.fasta	35142.8	1	9	13	36	0.0269	0.66
201210Orbi_Dave_Gelsample (1)	Uncategorized Sample	BioSample 1	P02 (F020884)	| Symbols: ATPA | ATP synthase subunit alpha | chrC:9938-11461 REVERSE LENGTH=507	ATCG00120.1	TAIR10_pep_20101214_contaminants.fasta	55329.8	0.998	2	2	2	0.0012	0.0533
201210Orbi_Dave_Gelsample (1)	Uncategorized Sample	BioSample 1	P03 (F020895)	| Symbols: ATPA | ATP synthase subunit alpha | chrC:9938-11461 REVERSE LENGTH=507	ATCG00120.1	TAIR10_pep_20101214_contaminants.fasta	55329.8	1	15	20	34	0.0253	0.355
201210Orbi_Dave_Gelsample (1)	Uncategorized Sample	BioSample 1	P04 (F020968)	| Symbols: ATPA | ATP synthase subunit alpha | chrC:9938-11461 REVERSE LENGTH=507	ATCG00120.1	TAIR10_pep_20101214_contaminants.fasta	55329.8	1	9	12	21	0.0532	0.219
201210Orbi_Dave_Gelsample (1)	Uncategorized Sample	BioSample 1	P05 (F020904)	| Symbols: ATPA | ATP synthase subunit alpha | chrC:9938-11461 REVERSE LENGTH=507	ATCG00120.1	TAIR10_pep_20101214_contaminants.fasta	55329.8	1	20	28	52	0.0408	0.398
201210Orbi_Dave_Gelsample (1)	Uncategorized Sample	BioSample 1	P08 (F020969)	| Symbols: ATPA | ATP synthase subunit alpha | chrC:9938-11461 REVERSE LENGTH=507	ATCG00120.1	TAIR10_pep_20101214_contaminants.fasta	55329.8	1	6	7	10	0.0133	0.152
201210Orbi_Dave_Gelsample (1)	Uncategorized Sample	BioSample 1	P09 (F020907)	| Symbols: ATPA | ATP synthase subunit alpha | chrC:9938-11461 REVERSE LENGTH=507	ATCG00120.1	TAIR10_pep_20101214_contaminants.fasta	55329.8	1	20	31	74	0.0861	0.385
201210Orbi_Dave_Gelsample (1)	Uncategorized Sample	BioSample 1	P10 (F020875)	| Symbols: ATPA | ATP synthase subunit alpha | chrC:9938-11461 REVERSE LENGTH=507	ATCG00120.1	TAIR10_pep_20101214_contaminants.fasta	55329.8	1	12	13	21	0.0128	0.29
201210Orbi_Dave_Gelsample (1)	Uncategorized Sample	BioSample 1	P11 (F020876)	| Symbols: ATPA | ATP synthase subunit alpha | chrC:9938-11461 REVERSE LENGTH=507	ATCG00120.1	TAIR10_pep_20101214_contaminants.fasta	55329.8	1	32	46	135	0.0862	0.564
201210Orbi_Dave_Gelsample (1)	Uncategorized Sample	BioSample 1	P14 (F020965)	| Symbols: ATPA | ATP synthase subunit alpha | chrC:9938-11461 REVERSE LENGTH=507	ATCG00120.1	TAIR10_pep_20101214_contaminants.fasta	55329.8	1	5	6	8	0.0112	0.128
201210Orbi_Dave_Gelsample (1)	Uncategorized Sample	BioSample 1	P30 (F020966)	| Symbols: ATPA | ATP synthase subunit alpha | chrC:9938-11461 REVERSE LENGTH=507	ATCG00120.1	TAIR10_pep_20101214_contaminants.fasta	55329.8	1	8	10	16	0.0222	0.201
201210Orbi_Dave_Gelsample (1)	Uncategorized Sample	BioSample 1	P31 (F020913)	| Symbols: ATPA | ATP synthase subunit alpha | chrC:9938-11461 REVERSE LENGTH=507	ATCG00120.1	TAIR10_pep_20101214_contaminants.fasta	55329.8	1	4	6	7	0.0048	0.112
201210Orbi_Dave_Gelsample (1)	Uncategorized Sample	BioSample 1	P35 (F020917)	| Symbols: ATPA | ATP synthase subunit alpha | chrC:9938-11461 REVERSE LENGTH=507	ATCG00120.1	TAIR10_pep_20101214_contaminants.fasta	55329.8	1	15	19	36	0.0341	0.351
201210Orbi_Dave_Gelsample (1)	Uncategorized Sample	BioSample 1	P36 (F020967)	| Symbols: ATPA | ATP synthase subunit alpha | chrC:9938-11461 REVERSE LENGTH=507	ATCG00120.1	TAIR10_pep_20101214_contaminants.fasta	55329.8	1	10	13	24	0.0382	0.245
201211Orbi_Dave_Gelsample2	Uncategorized Sample	BioSample 1	S03 (F020979)	| Symbols: ATPA | ATP synthase subunit alpha | chrC:9938-11461 REVERSE LENGTH=507	ATCG00120.1	TAIR10_pep_20101214_contaminants.fasta	55329.8	1	14	16	34	0.0242	0.341
201211Orbi_Dave_Gelsample2	Uncategorized Sample	BioSample 1	S12 (F020988)	| Symbols: ATPA | ATP synthase subunit alpha | chrC:9938-11461 REVERSE LENGTH=507	ATCG00120.1	TAIR10_pep_20101214_contaminants.fasta	55329.8	1	4	4	6	0.00416	0.0907
201211Orbi_Dave_Gelsample2	Uncategorized Sample	BioSample 1	S18 (F020994)	| Symbols: ATPA | ATP synthase subunit alpha | chrC:9938-11461 REVERSE LENGTH=507	ATCG00120.1	TAIR10_pep_20101214_contaminants.fasta	55329.8	1	4	4	5	0.00468	0.0907
201211Orbi_Dave_Gelsample2	Uncategorized Sample	BioSample 1	S29 (F021005)	| Symbols: ATPA | ATP synthase subunit alpha | chrC:9938-11461 REVERSE LENGTH=507	ATCG00120.1	TAIR10_pep_20101214_contaminants.fasta	55329.8	1	4	4	8	0.00753	0.0907
201211Orbi_Dave_Gelsample2	Uncategorized Sample	BioSample 1	S31 (F021013)	| Symbols: ATPA | ATP synthase subunit alpha | chrC:9938-11461 REVERSE LENGTH=507	ATCG00120.1	TAIR10_pep_20101214_contaminants.fasta	55329.8	1	8	10	21	0.0161	0.126
201211Orbi_Dave_Gelsample2	Uncategorized Sample	BioSample 1	S32 (F021014)	| Symbols: ATPA | ATP synthase subunit alpha | chrC:9938-11461 REVERSE LENGTH=507	ATCG00120.1	TAIR10_pep_20101214_contaminants.fasta	55329.8	1	4	4	7	0.00461	0.0848
201211Orbi_Dave_Gelsample2	Uncategorized Sample	BioSample 1	S56 (F021053)	| Symbols: ATPA | ATP synthase subunit alpha | chrC:9938-11461 REVERSE LENGTH=507	ATCG00120.1	TAIR10_pep_20101214_contaminants.fasta	55329.8	1	3	3	6	0.00503	0.0651
201210Orbi_Dave_Gelsample (1)	Uncategorized Sample	BioSample 1	P46 (F020927)	| Symbols: PSBD | photosystem II reaction center protein D | chrC:32711-33772 FORWARD LENGTH=353	ATCG00270.1	TAIR10_pep_20101214_contaminants.fasta	39548.8	1	3	3	3	0.0021	0.0907
201211Orbi_Dave_Gelsample2	Uncategorized Sample	BioSample 1	S54 (F021051)	| Symbols: PSBD | photosystem II reaction center protein D | chrC:32711-33772 FORWARD LENGTH=353	ATCG00270.1	TAIR10_pep_20101214_contaminants.fasta	39548.8	1	3	3	5	0.00545	0.0907
201210Orbi_Dave_Gelsample (1)	Uncategorized Sample	BioSample 1	P62 (F020943)	| Symbols: ATPE | ATP synthase epsilon chain | chrC:52265-52663 REVERSE LENGTH=132	ATCG00470.1	TAIR10_pep_20101214_contaminants.fasta	14499.3	1	5	6	9	0.0072	0.424
201210Orbi_Dave_Gelsample (1)	Uncategorized Sample	BioSample 1	P69 (F020950)	| Symbols: ATPE | ATP synthase epsilon chain | chrC:52265-52663 REVERSE LENGTH=132	ATCG00470.1	TAIR10_pep_20101214_contaminants.fasta	14499.3	1	3	3	6	0.0073	0.341
201210Orbi_Dave_Gelsample (1)	Uncategorized Sample	BioSample 1	P72 (F020953)	| Symbols: ATPE | ATP synthase epsilon chain | chrC:52265-52663 REVERSE LENGTH=132	ATCG00470.1	TAIR10_pep_20101214_contaminants.fasta	14499.3	1	6	7	11	0.0111	0.508
201211Orbi_Dave_Gelsample2	Uncategorized Sample	BioSample 1	S01 (F020977)	| Symbols: ATPE | ATP synthase epsilon chain | chrC:52265-52663 REVERSE LENGTH=132	ATCG00470.1	TAIR10_pep_20101214_contaminants.fasta	14499.3	1	4	4	7	0.0082	0.417
201211Orbi_Dave_Gelsample2	Uncategorized Sample	BioSample 1	S38 (F021020)	| Symbols: ATPE | ATP synthase epsilon chain | chrC:52265-52663 REVERSE LENGTH=132	ATCG00470.1	TAIR10_pep_20101214_contaminants.fasta	14499.3	1	5	8	19	0.0164	0.477
201211Orbi_Dave_Gelsample2	Uncategorized Sample	BioSample 1	S45 (F021042)	| Symbols: ATPE | ATP synthase epsilon chain | chrC:52265-52663 REVERSE LENGTH=132	ATCG00470.1	TAIR10_pep_20101214_contaminants.fasta	14499.3	1	4	4	6	0.00617	0.409
201210Orbi_Dave_Gelsample (1)	Uncategorized Sample	BioSample 1	P11 (F020876)	| Symbols: ATPB, PB | ATP synthase subunit beta | chrC:52660-54156 REVERSE LENGTH=498	ATCG00480.1	TAIR10_pep_20101214_contaminants.fasta	53934.8	1	4	4	4	0.0026	0.133
201210Orbi_Dave_Gelsample (1)	Uncategorized Sample	BioSample 1	P36 (F020967)	| Symbols: ATPB, PB | ATP synthase subunit beta | chrC:52660-54156 REVERSE LENGTH=498	ATCG00480.1	TAIR10_pep_20101214_contaminants.fasta	53934.8	1	9	10	16	0.0255	0.277
201210Orbi_Dave_Gelsample (1)	Uncategorized Sample	BioSample 1	P44 (F020925)	| Symbols: ATPB, PB | ATP synthase subunit beta | chrC:52660-54156 REVERSE LENGTH=498	ATCG00480.1	TAIR10_pep_20101214_contaminants.fasta	53934.8	1	9	10	13	0.0073	0.217
201211Orbi_Dave_Gelsample2	Uncategorized Sample	BioSample 1	S04 (F020980)	| Symbols: ATPB, PB | ATP synthase subunit beta | chrC:52660-54156 REVERSE LENGTH=498	ATCG00480.1	TAIR10_pep_20101214_contaminants.fasta	53934.8	1	28	42	111	0.0717	0.679
201211Orbi_Dave_Gelsample2	Uncategorized Sample	BioSample 1	S13 (F020989)	| Symbols: ATPB, PB | ATP synthase subunit beta | chrC:52660-54156 REVERSE LENGTH=498	ATCG00480.1	TAIR10_pep_20101214_contaminants.fasta	53934.8	1	5	5	9	0.00611	0.127
201210Orbi_Dave_Gelsample (1)	Uncategorized Sample	BioSample 1	P01 (F020874)	| Symbols: RBCL | ribulose-bisphosphate carboxylases | chrC:54958-56397 FORWARD LENGTH=479	ATCG00490.1	TAIR10_pep_20101214_contaminants.fasta	52955.6	1	3	3	4	0.0025	0.0877
201210Orbi_Dave_Gelsample (1)	Uncategorized Sample	BioSample 1	P02 (F020884)	| Symbols: RBCL | ribulose-bisphosphate carboxylases | chrC:54958-56397 FORWARD LENGTH=479	ATCG00490.1	TAIR10_pep_20101214_contaminants.fasta	52955.6	1	3	3	4	0.0024	0.0731
201210Orbi_Dave_Gelsample (1)	Uncategorized Sample	BioSample 1	P03 (F020895)	| Symbols: RBCL | ribulose-bisphosphate carboxylases | chrC:54958-56397 FORWARD LENGTH=479	ATCG00490.1	TAIR10_pep_20101214_contaminants.fasta	52955.6	0.998	2	2	4	0.003	0.0605
201210Orbi_Dave_Gelsample (1)	Uncategorized Sample	BioSample 1	P04 (F020968)	| Symbols: RBCL | ribulose-bisphosphate carboxylases | chrC:54958-56397 FORWARD LENGTH=479	ATCG00490.1	TAIR10_pep_20101214_contaminants.fasta	52955.6	0.998	2	2	4	0.0101	0.0438
201210Orbi_Dave_Gelsample (1)	Uncategorized Sample	BioSample 1	P05 (F020904)	| Symbols: RBCL | ribulose-bisphosphate carboxylases | chrC:54958-56397 FORWARD LENGTH=479	ATCG00490.1	TAIR10_pep_20101214_contaminants.fasta	52955.6	1	5	5	8	0.0063	0.129
201210Orbi_Dave_Gelsample (1)	Uncategorized Sample	BioSample 1	P06 (F020905)	| Symbols: RBCL | ribulose-bisphosphate carboxylases | chrC:54958-56397 FORWARD LENGTH=479	ATCG00490.1	TAIR10_pep_20101214_contaminants.fasta	52955.6	1	4	4	6	0.004	0.0814
201210Orbi_Dave_Gelsample (1)	Uncategorized Sample	BioSample 1	P07 (F020906)	| Symbols: RBCL | ribulose-bisphosphate carboxylases | chrC:54958-56397 FORWARD LENGTH=479	ATCG00490.1	TAIR10_pep_20101214_contaminants.fasta	52955.6	1	9	9	14	0.0098	0.225
201210Orbi_Dave_Gelsample (1)	Uncategorized Sample	BioSample 1	P08 (F020969)	| Symbols: RBCL | ribulose-bisphosphate carboxylases | chrC:54958-56397 FORWARD LENGTH=479	ATCG00490.1	TAIR10_pep_20101214_contaminants.fasta	52955.6	1	4	4	7	0.0093	0.0856
201210Orbi_Dave_Gelsample (1)	Uncategorized Sample	BioSample 1	P09 (F020907)	| Symbols: RBCL | ribulose-bisphosphate carboxylases | chrC:54958-56397 FORWARD LENGTH=479	ATCG00490.1	TAIR10_pep_20101214_contaminants.fasta	52955.6	1	9	9	15	0.0175	0.207
201210Orbi_Dave_Gelsample (1)	Uncategorized Sample	BioSample 1	P10 (F020875)	| Symbols: RBCL | ribulose-bisphosphate carboxylases | chrC:54958-56397 FORWARD LENGTH=479	ATCG00490.1	TAIR10_pep_20101214_contaminants.fasta	52955.6	1	9	11	25	0.0152	0.215
201210Orbi_Dave_Gelsample (1)	Uncategorized Sample	BioSample 1	P11 (F020876)	| Symbols: RBCL | ribulose-bisphosphate carboxylases | chrC:54958-56397 FORWARD LENGTH=479	ATCG00490.1	TAIR10_pep_20101214_contaminants.fasta	52955.6	1	26	35	72	0.0459	0.468
201210Orbi_Dave_Gelsample (1)	Uncategorized Sample	BioSample 1	P13 (F020878)	| Symbols: RBCL | ribulose-bisphosphate carboxylases | chrC:54958-56397 FORWARD LENGTH=479	ATCG00490.1	TAIR10_pep_20101214_contaminants.fasta	52955.6	1	7	7	12	0.0216	0.169
201210Orbi_Dave_Gelsample (1)	Uncategorized Sample	BioSample 1	P14 (F020965)	| Symbols: RBCL | ribulose-bisphosphate carboxylases | chrC:54958-56397 FORWARD LENGTH=479	ATCG00490.1	TAIR10_pep_20101214_contaminants.fasta	52955.6	1	3	3	4	0.0056	0.0626
201210Orbi_Dave_Gelsample (1)	Uncategorized Sample	BioSample 1	P17 (F020881)	| Symbols: RBCL | ribulose-bisphosphate carboxylases | chrC:54958-56397 FORWARD LENGTH=479	ATCG00490.1	TAIR10_pep_20101214_contaminants.fasta	52955.6	1	9	9	26	0.0378	0.203
201210Orbi_Dave_Gelsample (1)	Uncategorized Sample	BioSample 1	P18 (F020882)	| Symbols: RBCL | ribulose-bisphosphate carboxylases | chrC:54958-56397 FORWARD LENGTH=479	ATCG00490.1	TAIR10_pep_20101214_contaminants.fasta	52955.6	0.998	2	2	6	0.0115	0.0438
201210Orbi_Dave_Gelsample (1)	Uncategorized Sample	BioSample 1	P19 (F020883)	| Symbols: RBCL | ribulose-bisphosphate carboxylases | chrC:54958-56397 FORWARD LENGTH=479	ATCG00490.1	TAIR10_pep_20101214_contaminants.fasta	52955.6	1	5	5	11	0.0141	0.117
201210Orbi_Dave_Gelsample (1)	Uncategorized Sample	BioSample 1	P20 (F020885)	| Symbols: RBCL | ribulose-bisphosphate carboxylases | chrC:54958-56397 FORWARD LENGTH=479	ATCG00490.1	TAIR10_pep_20101214_contaminants.fasta	52955.6	1	13	14	20	0.0157	0.332
201210Orbi_Dave_Gelsample (1)	Uncategorized Sample	BioSample 1	P21 (F020886)	| Symbols: RBCL | ribulose-bisphosphate carboxylases | chrC:54958-56397 FORWARD LENGTH=479	ATCG00490.1	TAIR10_pep_20101214_contaminants.fasta	52955.6	1	9	9	15	0.0118	0.251
201210Orbi_Dave_Gelsample (1)	Uncategorized Sample	BioSample 1	P22 (F020887)	| Symbols: RBCL | ribulose-bisphosphate carboxylases | chrC:54958-56397 FORWARD LENGTH=479	ATCG00490.1	TAIR10_pep_20101214_contaminants.fasta	52955.6	1	5	5	6	0.0053	0.117
201210Orbi_Dave_Gelsample (1)	Uncategorized Sample	BioSample 1	P24 (F020889)	| Symbols: RBCL | ribulose-bisphosphate carboxylases | chrC:54958-56397 FORWARD LENGTH=479	ATCG00490.1	TAIR10_pep_20101214_contaminants.fasta	52955.6	1	7	7	13	0.016	0.18
201210Orbi_Dave_Gelsample (1)	Uncategorized Sample	BioSample 1	P25 (F020908)	| Symbols: RBCL | ribulose-bisphosphate carboxylases | chrC:54958-56397 FORWARD LENGTH=479	ATCG00490.1	TAIR10_pep_20101214_contaminants.fasta	52955.6	1	7	7	9	0.01	0.167
201210Orbi_Dave_Gelsample (1)	Uncategorized Sample	BioSample 1	P26 (F020909)	| Symbols: RBCL | ribulose-bisphosphate carboxylases | chrC:54958-56397 FORWARD LENGTH=479	ATCG00490.1	TAIR10_pep_20101214_contaminants.fasta	52955.6	1	7	7	8	0.0088	0.167
201210Orbi_Dave_Gelsample (1)	Uncategorized Sample	BioSample 1	P27 (F020910)	| Symbols: RBCL | ribulose-bisphosphate carboxylases | chrC:54958-56397 FORWARD LENGTH=479	ATCG00490.1	TAIR10_pep_20101214_contaminants.fasta	52955.6	1	11	11	19	0.0127	0.282
201210Orbi_Dave_Gelsample (1)	Uncategorized Sample	BioSample 1	P28 (F020911)	| Symbols: RBCL | ribulose-bisphosphate carboxylases | chrC:54958-56397 FORWARD LENGTH=479	ATCG00490.1	TAIR10_pep_20101214_contaminants.fasta	52955.6	1	11	11	19	0.0128	0.273
201210Orbi_Dave_Gelsample (1)	Uncategorized Sample	BioSample 1	P29 (F020912)	| Symbols: RBCL | ribulose-bisphosphate carboxylases | chrC:54958-56397 FORWARD LENGTH=479	ATCG00490.1	TAIR10_pep_20101214_contaminants.fasta	52955.6	1	14	15	27	0.0157	0.355
201210Orbi_Dave_Gelsample (1)	Uncategorized Sample	BioSample 1	P30 (F020966)	| Symbols: RBCL | ribulose-bisphosphate carboxylases | chrC:54958-56397 FORWARD LENGTH=479	ATCG00490.1	TAIR10_pep_20101214_contaminants.fasta	52955.6	1	3	3	6	0.0083	0.0626
201210Orbi_Dave_Gelsample (1)	Uncategorized Sample	BioSample 1	P31 (F020913)	| Symbols: RBCL | ribulose-bisphosphate carboxylases | chrC:54958-56397 FORWARD LENGTH=479	ATCG00490.1	TAIR10_pep_20101214_contaminants.fasta	52955.6	1	11	11	19	0.0129	0.269
201210Orbi_Dave_Gelsample (1)	Uncategorized Sample	BioSample 1	P32 (F020914)	| Symbols: RBCL | ribulose-bisphosphate carboxylases | chrC:54958-56397 FORWARD LENGTH=479	ATCG00490.1	TAIR10_pep_20101214_contaminants.fasta	52955.6	1	16	17	33	0.024	0.37
201210Orbi_Dave_Gelsample (1)	Uncategorized Sample	BioSample 1	P33 (F020915)	| Symbols: RBCL | ribulose-bisphosphate carboxylases | chrC:54958-56397 FORWARD LENGTH=479	ATCG00490.1	TAIR10_pep_20101214_contaminants.fasta	52955.6	1	17	23	43	0.0304	0.392
201210Orbi_Dave_Gelsample (1)	Uncategorized Sample	BioSample 1	P34 (F020916)	| Symbols: RBCL | ribulose-bisphosphate carboxylases | chrC:54958-56397 FORWARD LENGTH=479	ATCG00490.1	TAIR10_pep_20101214_contaminants.fasta	52955.6	1	11	12	27	0.0223	0.278
201210Orbi_Dave_Gelsample (1)	Uncategorized Sample	BioSample 1	P35 (F020917)	| Symbols: RBCL | ribulose-bisphosphate carboxylases | chrC:54958-56397 FORWARD LENGTH=479	ATCG00490.1	TAIR10_pep_20101214_contaminants.fasta	52955.6	1	5	5	10	0.0095	0.125
201210Orbi_Dave_Gelsample (1)	Uncategorized Sample	BioSample 1	P36 (F020967)	| Symbols: RBCL | ribulose-bisphosphate carboxylases | chrC:54958-56397 FORWARD LENGTH=479	ATCG00490.1	TAIR10_pep_20101214_contaminants.fasta	52955.6	1	11	11	18	0.0287	0.282
201210Orbi_Dave_Gelsample (1)	Uncategorized Sample	BioSample 1	P37 (F020918)	| Symbols: RBCL | ribulose-bisphosphate carboxylases | chrC:54958-56397 FORWARD LENGTH=479	ATCG00490.1	TAIR10_pep_20101214_contaminants.fasta	52955.6	1	17	22	41	0.0299	0.407
201210Orbi_Dave_Gelsample (1)	Uncategorized Sample	BioSample 1	P38 (F020919)	| Symbols: RBCL | ribulose-bisphosphate carboxylases | chrC:54958-56397 FORWARD LENGTH=479	ATCG00490.1	TAIR10_pep_20101214_contaminants.fasta	52955.6	1	10	10	17	0.0118	0.238
201210Orbi_Dave_Gelsample (1)	Uncategorized Sample	BioSample 1	P40 (F020921)	| Symbols: RBCL | ribulose-bisphosphate carboxylases | chrC:54958-56397 FORWARD LENGTH=479	ATCG00490.1	TAIR10_pep_20101214_contaminants.fasta	52955.6	1	10	12	19	0.0106	0.255
201210Orbi_Dave_Gelsample (1)	Uncategorized Sample	BioSample 1	P43 (F020924)	| Symbols: RBCL | ribulose-bisphosphate carboxylases | chrC:54958-56397 FORWARD LENGTH=479	ATCG00490.1	TAIR10_pep_20101214_contaminants.fasta	52955.6	1	13	17	24	0.0125	0.301
201210Orbi_Dave_Gelsample (1)	Uncategorized Sample	BioSample 1	P49 (F020930)	| Symbols: RBCL | ribulose-bisphosphate carboxylases | chrC:54958-56397 FORWARD LENGTH=479	ATCG00490.1	TAIR10_pep_20101214_contaminants.fasta	52955.6	1	6	6	6	0.0036	0.132
201210Orbi_Dave_Gelsample (1)	Uncategorized Sample	BioSample 1	P53 (F020934)	| Symbols: RBCL | ribulose-bisphosphate carboxylases | chrC:54958-56397 FORWARD LENGTH=479	ATCG00490.1	TAIR10_pep_20101214_contaminants.fasta	52955.6	1	11	11	15	0.0098	0.248
201210Orbi_Dave_Gelsample (1)	Uncategorized Sample	BioSample 1	P54 (F020935)	| Symbols: RBCL | ribulose-bisphosphate carboxylases | chrC:54958-56397 FORWARD LENGTH=479	ATCG00490.1	TAIR10_pep_20101214_contaminants.fasta	52955.6	1	16	16	30	0.0236	0.378
201210Orbi_Dave_Gelsample (1)	Uncategorized Sample	BioSample 1	P57 (F020938)	| Symbols: RBCL | ribulose-bisphosphate carboxylases | chrC:54958-56397 FORWARD LENGTH=479	ATCG00490.1	TAIR10_pep_20101214_contaminants.fasta	52955.6	0.998	2	2	2	0.0013	0.0543
201210Orbi_Dave_Gelsample (1)	Uncategorized Sample	BioSample 1	P58 (F020939)	| Symbols: RBCL | ribulose-bisphosphate carboxylases | chrC:54958-56397 FORWARD LENGTH=479	ATCG00490.1	TAIR10_pep_20101214_contaminants.fasta	52955.6	1	5	5	9	0.0066	0.117
201210Orbi_Dave_Gelsample (1)	Uncategorized Sample	BioSample 1	P59 (F020940)	| Symbols: RBCL | ribulose-bisphosphate carboxylases | chrC:54958-56397 FORWARD LENGTH=479	ATCG00490.1	TAIR10_pep_20101214_contaminants.fasta	52955.6	1	13	16	31	0.0276	0.246
201210Orbi_Dave_Gelsample (1)	Uncategorized Sample	BioSample 1	P62 (F020943)	| Symbols: RBCL | ribulose-bisphosphate carboxylases | chrC:54958-56397 FORWARD LENGTH=479	ATCG00490.1	TAIR10_pep_20101214_contaminants.fasta	52955.6	1	4	4	6	0.0048	0.109
201210Orbi_Dave_Gelsample (1)	Uncategorized Sample	BioSample 1	P63 (F020944)	| Symbols: RBCL | ribulose-bisphosphate carboxylases | chrC:54958-56397 FORWARD LENGTH=479	ATCG00490.1	TAIR10_pep_20101214_contaminants.fasta	52955.6	1	5	6	9	0.0076	0.0919
201210Orbi_Dave_Gelsample (1)	Uncategorized Sample	BioSample 1	P65 (F020946)	| Symbols: RBCL | ribulose-bisphosphate carboxylases | chrC:54958-56397 FORWARD LENGTH=479	ATCG00490.1	TAIR10_pep_20101214_contaminants.fasta	52955.6	1	3	3	4	0.0033	0.0668
201210Orbi_Dave_Gelsample (1)	Uncategorized Sample	BioSample 1	P74 (F020955)	| Symbols: RBCL | ribulose-bisphosphate carboxylases | chrC:54958-56397 FORWARD LENGTH=479	ATCG00490.1	TAIR10_pep_20101214_contaminants.fasta	52955.6	0.998	2	2	3	0.0037	0.0438
201211Orbi_Dave_Gelsample2	Uncategorized Sample	BioSample 1	S03 (F020979)	| Symbols: RBCL | ribulose-bisphosphate carboxylases | chrC:54958-56397 FORWARD LENGTH=479	ATCG00490.1	TAIR10_pep_20101214_contaminants.fasta	52955.6	0.999	2	2	4	0.00285	0.0418
201211Orbi_Dave_Gelsample2	Uncategorized Sample	BioSample 1	S04 (F020980)	| Symbols: RBCL | ribulose-bisphosphate carboxylases | chrC:54958-56397 FORWARD LENGTH=479	ATCG00490.1	TAIR10_pep_20101214_contaminants.fasta	52955.6	1	3	3	4	0.00258	0.0626
201211Orbi_Dave_Gelsample2	Uncategorized Sample	BioSample 1	S16 (F020992)	| Symbols: RBCL | ribulose-bisphosphate carboxylases | chrC:54958-56397 FORWARD LENGTH=479	ATCG00490.1	TAIR10_pep_20101214_contaminants.fasta	52955.6	1	2	2	3	0.00215	0.0376
201211Orbi_Dave_Gelsample2	Uncategorized Sample	BioSample 1	S20 (F020996)	| Symbols: RBCL | ribulose-bisphosphate carboxylases | chrC:54958-56397 FORWARD LENGTH=479	ATCG00490.1	TAIR10_pep_20101214_contaminants.fasta	52955.6	1	2	2	3	0.00227	0.0626
201211Orbi_Dave_Gelsample2	Uncategorized Sample	BioSample 1	S21 (F020997)	| Symbols: RBCL | ribulose-bisphosphate carboxylases | chrC:54958-56397 FORWARD LENGTH=479	ATCG00490.1	TAIR10_pep_20101214_contaminants.fasta	52955.6	1	5	5	6	0.00458	0.0898
201211Orbi_Dave_Gelsample2	Uncategorized Sample	BioSample 1	S22 (F020998)	| Symbols: RBCL | ribulose-bisphosphate carboxylases | chrC:54958-56397 FORWARD LENGTH=479	ATCG00490.1	TAIR10_pep_20101214_contaminants.fasta	52955.6	1	3	3	4	0.00309	0.0585
201211Orbi_Dave_Gelsample2	Uncategorized Sample	BioSample 1	S26 (F021002)	| Symbols: RBCL | ribulose-bisphosphate carboxylases | chrC:54958-56397 FORWARD LENGTH=479	ATCG00490.1	TAIR10_pep_20101214_contaminants.fasta	52955.6	1	2	2	3	0.00263	0.0626
201211Orbi_Dave_Gelsample2	Uncategorized Sample	BioSample 1	S30 (F021012)	| Symbols: RBCL | ribulose-bisphosphate carboxylases | chrC:54958-56397 FORWARD LENGTH=479	ATCG00490.1	TAIR10_pep_20101214_contaminants.fasta	52955.6	1	3	3	5	0.00353	0.0522
201211Orbi_Dave_Gelsample2	Uncategorized Sample	BioSample 1	S53 (F021050)	| Symbols: RBCL | ribulose-bisphosphate carboxylases | chrC:54958-56397 FORWARD LENGTH=479	ATCG00490.1	TAIR10_pep_20101214_contaminants.fasta	52955.6	1	4	4	6	0.00442	0.0752
201211Orbi_Dave_Gelsample2	Uncategorized Sample	BioSample 1	S56 (F021053)	| Symbols: RBCL | ribulose-bisphosphate carboxylases | chrC:54958-56397 FORWARD LENGTH=479	ATCG00490.1	TAIR10_pep_20101214_contaminants.fasta	52955.6	1	12	13	20	0.0168	0.261
201210Orbi_Dave_Gelsample (1)	Uncategorized Sample	BioSample 1	P57 (F020938)	| Symbols: PETA | photosynthetic electron transfer A | chrC:61657-62619 FORWARD LENGTH=320	ATCG00540.1	TAIR10_pep_20101214_contaminants.fasta	35358	1	5	5	7	0.0045	0.209
201211Orbi_Dave_Gelsample2	Uncategorized Sample	BioSample 1	S10 (F020986)	| Symbols: PETA | photosynthetic electron transfer A | chrC:61657-62619 FORWARD LENGTH=320	ATCG00540.1	TAIR10_pep_20101214_contaminants.fasta	35358	1	4	4	8	0.00606	0.153
201211Orbi_Dave_Gelsample2	Uncategorized Sample	BioSample 1	S26 (F021002)	| Symbols: PETA | photosynthetic electron transfer A | chrC:61657-62619 FORWARD LENGTH=320	ATCG00540.1	TAIR10_pep_20101214_contaminants.fasta	35358	1	6	6	10	0.00876	0.206
